# Supplementary material for: The RNA helicase DDX39B activates FOXP3 RNA splicing to control T regulatory cell fate
Source: eLife. 2023 Jun 1;12:e76927. doi: 10.7554/eLife.76927 (PMC10234631; doi:10.7554/eLife.76927)
Supplement: Supplementary file 1. — Related to Figure 1 and Figure 1—figure supplement 1. [file elife-76927-supp1.xlsx]

## Sheet: 2RPKM_D1andD4_Sh3(03)-Sh5(01)
Supplementary file 1. Differentially expressed genes after DDX39B-depletion observed with both shRNAs in both donors. Related to Figure 1 and Figure 1-figure supplement 1.
ENS_name	Nice_name	Score_Donor1_Sh3	Score_Donor1_Sh5	Score_Donor4_Sh3	Score_Donor4_Sh5
ENSG00000262202.4	RP11-160E2.6	1.94615	1.14911	1.7165	0.91164
ENSG00000005379.15	BZRAP1	1.34563	2.26686	1.52773	2.16474
ENSG00000104936.17	DMPK	1.20206	0.668379	1.11223	0.698538
ENSG00000090382.6	LYZ	1.13706	0.477241	0.646703	0.327961
ENSG00000177606.6	JUN	1.07648	0.537562	0.886925	0.337942				Up	Down	Total
ENSG00000169715.14	MT1E	1.0661	0.387992	0.969781	0.626192				232	122	354
ENSG00000166987.14	MBD6	1.04871	0.863524	0.848216	0.644506
ENSG00000257764.2	RP11-1143G9.4	1.04507	0.210397	0.591723	0.381726
ENSG00000185800.11	DMWD	0.997074	0.623651	0.615994	0.487646
ENSG00000134982.16	APC	0.905264	0.522353	0.676423	0.463454
ENSG00000206530.8	CFAP44	0.870532	0.582802	0.718764	0.599135
ENSG00000120129.5	DUSP1	0.852057	0.314895	0.81744	0.51181
ENSG00000127184.10	COX7C	0.837008	0.560136	0.588197	0.51384
ENSG00000064547.13	LPAR2	0.833873	0.633183	0.768164	0.402435
ENSG00000135437.9	RDH5	0.826861	0.258641	0.926389	0.343905
ENSG00000007516.13	BAIAP3	0.80872	0.985346	0.670871	0.646755
ENSG00000138449.10	SLC40A1	0.798577	0.284413	0.482641	0.30491
ENSG00000181555.19	SETD2	0.769	0.655896	0.551257	0.469212
ENSG00000144674.16	GOLGA4	0.757627	0.497658	0.74874	0.670569
ENSG00000151233.10	GXYLT1	0.754378	0.373057	0.564172	0.465219
ENSG00000176749.8	CDK5R1	0.750664	0.847454	0.62461	0.665397
ENSG00000138413.13	IDH1	0.747325	0.393032	0.496998	0.281039
ENSG00000239775.1	AC017116.11	0.722679	0.59084	0.485067	0.360688
ENSG00000164708.5	PGAM2	0.719688	0.675062	0.473212	0.318237
ENSG00000113360.16	DROSHA	0.696882	0.511647	0.549241	0.29425
ENSG00000161996.17	WDR90	0.690637	0.74915	0.532863	0.446275
ENSG00000273188.1	RP3-402G11.25	0.68318	0.485431	0.367181	0.173087
ENSG00000109787.12	KLF3	0.68184	0.465891	0.346767	0.373045
ENSG00000146757.13	ZNF92	0.680011	0.39219	0.316557	0.385663
ENSG00000085465.12	OVGP1	0.673486	0.497601	0.747144	0.224104
ENSG00000143387.12	CTSK	0.672763	0.499679	0.955859	0.561118
ENSG00000065526.10	SPEN	0.669558	0.538831	0.370409	0.203958
ENSG00000047634.14	SCML1	0.667034	0.265088	0.558612	0.522702
ENSG00000111676.14	ATN1	0.666998	0.405792	0.536671	0.2882
ENSG00000196247.11	ZNF107	0.660755	0.312533	0.613218	0.498643
ENSG00000264112.1	RP11-159D12.2	0.660181	0.53765	0.801141	0.637828
ENSG00000100852.12	ARHGAP5	0.658082	0.193859	0.429155	0.314332
ENSG00000112303.13	VNN2	0.652304	0.414566	0.337566	0.109254
ENSG00000101350.7	KIF3B	0.646198	0.202794	0.589104	0.23074
ENSG00000260948.1	RP11-552M11.8	0.64356	0.359409	0.405853	0.21659
ENSG00000006459.10	KDM7A	0.642216	0.378163	0.444335	0.45528
ENSG00000118965.14	WDR35	0.633948	0.448126	0.687729	0.464128
ENSG00000111229.15	ARPC3	0.633627	0.403282	0.478945	0.460976
ENSG00000116539.10	ASH1L	0.63205	0.596292	0.512491	0.446307
ENSG00000095951.16	HIVEP1	0.623473	0.492841	0.38156	0.259398
ENSG00000118412.12	CASP8AP2	0.621976	0.301148	0.336069	0.334481
ENSG00000255031.5	RP11-802E16.3	0.621972	0.240367	0.407054	0.111468
ENSG00000270127.2	RP11-526I2.5	0.619196	0.181031	0.495099	0.333808
ENSG00000101745.15	ANKRD12	0.618221	0.260839	0.749389	0.650686
ENSG00000226423.1	AC093642.4	0.617673	0.697057	0.597129	0.377598
ENSG00000186174.12	BCL9L	0.613885	0.500377	0.32206	0.201605
ENSG00000127125.8	PPCS	0.611269	0.483744	0.523306	0.596121
ENSG00000123360.11	PDE1B	0.610127	0.816129	0.76612	0.736829
ENSG00000100918.12	REC8	0.601106	0.437847	0.779295	0.365277
ENSG00000279658.1	RP11-389G6.4	0.600577	0.34365	0.331551	0.52831
ENSG00000265972.5	TXNIP	0.597966	0.699459	0.438893	0.624171
ENSG00000170385.9	SLC30A1	0.59375	0.285995	0.361926	0.409315
ENSG00000112110.9	MRPL18	0.584542	0.162366	0.305831	0.181687
ENSG00000269352.1	PTOV1-AS2	0.580164	0.500486	0.484919	0.256471
ENSG00000173230.15	GOLGB1	0.575883	0.589465	0.409492	0.416743
ENSG00000121671.11	CRY2	0.573668	0.46311	0.512468	0.295543
ENSG00000166326.6	TRIM44	0.573013	0.288192	0.391599	0.276134
ENSG00000221978.11	CCNL2	0.568039	0.421721	0.399231	0.163929
ENSG00000034053.14	APBA2	0.567913	0.605149	0.543767	0.236489
ENSG00000124074.11	ENKD1	0.565587	0.809493	0.570867	0.690526
ENSG00000258515.1	RP11-203M5.7	0.563355	0.336167	0.354555	0.110774
ENSG00000101247.17	NDUFAF5	0.556099	0.405887	0.425021	0.446187
ENSG00000160305.17	DIP2A	0.547213	0.332582	0.367461	0.203149
ENSG00000154945.6	ANKRD40	0.546656	0.146757	0.539044	0.323498
ENSG00000135205.14	CCDC146	0.544372	0.224241	0.431176	0.206778
ENSG00000205702.10	CYP2D7	0.542934	0.634335	0.526058	0.126267
ENSG00000089639.10	GMIP	0.539021	0.398265	0.335328	0.117619
ENSG00000179010.14	MRFAP1	0.535418	0.143221	0.445353	0.151673
ENSG00000261373.1	VPS9D1-AS1	0.534955	0.584464	0.376726	0.403705
ENSG00000124103.8	FAM209A	0.532279	0.425924	0.4617	0.350043
ENSG00000073331.17	ALPK1	0.532151	0.341549	0.353495	0.165672
ENSG00000173020.10	ADRBK1	0.532121	0.304772	0.420468	0.222067
ENSG00000174243.9	DDX23	0.53145	0.23357	0.445133	0.101619
ENSG00000026652.13	AGPAT4	0.528929	0.244439	0.578973	0.20292
ENSG00000136153.19	LMO7	0.52749	0.267942	0.336324	0.145714
ENSG00000009335.17	UBE3C	0.52305	0.138283	0.340961	0.180174
ENSG00000108465.14	CDK5RAP3	0.520708	0.416335	0.515661	0.302324
ENSG00000108509.20	CAMTA2	0.520518	0.457935	0.429625	0.305128
ENSG00000183530.13	PRR14L	0.519339	0.489538	0.351312	0.336908
ENSG00000109572.13	CLCN3	0.516782	0.193111	0.390558	0.299283
ENSG00000172819.16	RARG	0.514398	0.331306	0.32662	0.172705
ENSG00000104960.15	PTOV1	0.513887	0.508321	0.314567	0.147213
ENSG00000068697.6	LAPTM4A	0.512788	0.162317	0.37927	0.204216
ENSG00000213799.10	ZNF845	0.512189	0.182018	0.31138	0.185381
ENSG00000257027.1	RP11-705C15.3	0.511127	0.1297	0.58333	0.245823
ENSG00000090372.14	STRN4	0.507453	0.195287	0.408358	0.149798
ENSG00000188636.3	LDOC1L	0.506734	0.383481	0.326599	0.179373
ENSG00000261490.1	RP11-448G15.3	0.506053	0.574576	0.512957	0.705197
ENSG00000130787.13	HIP1R	0.504458	0.437701	0.384553	0.161906
ENSG00000158805.11	ZNF276	0.503785	0.319185	0.341461	0.199755
ENSG00000161013.16	MGAT4B	0.503685	0.343844	0.347502	0.174346
ENSG00000279155.1	LL0XNC01-36H8.1	0.50302	0.367232	0.325538	0.122042
ENSG00000137500.9	CCDC90B	0.501684	0.425622	0.327731	0.443647
ENSG00000258034.1	RP11-493P1.2	0.500495	0.386885	0.303973	0.218975
ENSG00000063245.14	EPN1	0.499521	0.136073	0.414353	0.11833
ENSG00000170638.9	TRABD	0.497952	0.104589	0.513388	0.112929
ENSG00000141279.15	NPEPPS	0.497165	0.342687	0.368398	0.285281
ENSG00000100441.9	KHNYN	0.49708	0.402921	0.375081	0.237169
ENSG00000179094.13	PER1	0.494832	0.51968	0.401878	0.157774
ENSG00000149091.15	DGKZ	0.492965	0.396339	0.486981	0.211011
ENSG00000110719.9	TCIRG1	0.492494	0.351973	0.470027	0.150391
ENSG00000197892.12	KIF13B	0.491615	0.189743	0.44774	0.152805
ENSG00000146830.9	GIGYF1	0.491276	0.433097	0.344298	0.196837
ENSG00000177728.14	TMEM94	0.488523	0.318716	0.463895	0.109238
ENSG00000120662.15	MTRF1	0.486853	0.13457	0.381697	0.206541
ENSG00000146350.13	TBC1D32	0.486108	0.237443	0.534889	0.363547
ENSG00000147231.13	CXorf57	0.483223	0.211098	0.550393	0.166836
ENSG00000278299.4	TBC1D3C	0.482584	0.416807	0.394303	0.145338
ENSG00000163482.11	STK36	0.478663	0.511788	0.452643	0.268026
ENSG00000135315.11	CEP162	0.478431	0.376853	0.438767	0.375263
ENSG00000167778.8	SPRYD3	0.476321	0.177629	0.349096	0.127966
ENSG00000100815.12	TRIP11	0.476264	0.291153	0.328581	0.335048
ENSG00000160683.4	CXCR5	0.473579	0.392539	0.333194	0.206441
ENSG00000166860.2	ZBTB39	0.470837	0.300767	0.328387	0.27456
ENSG00000158769.17	F11R	0.468899	0.137207	0.565874	0.179105
ENSG00000240053.8	LY6G5B	0.468632	0.41917	0.499529	0.304235
ENSG00000115216.13	NRBP1	0.468485	0.316704	0.332764	0.147156
ENSG00000177084.16	POLE	0.466157	0.39013	0.307706	0.188619
ENSG00000257550.1	RP11-793H13.3	0.460657	0.250704	0.310009	0.193374
ENSG00000139636.15	LMBR1L	0.459456	0.341988	0.439627	0.107815
ENSG00000258441.1	LINC00641	0.459167	0.245119	0.542828	0.460503
ENSG00000139644.12	TMBIM6	0.458063	0.26285	0.359778	0.295326
ENSG00000204305.13	AGER	0.456642	0.558094	0.319592	0.398927
ENSG00000140474.12	ULK3	0.453177	0.33295	0.453755	0.240042
ENSG00000115548.16	KDM3A	0.452964	0.439166	0.35888	0.423909
ENSG00000110888.17	CAPRIN2	0.451096	0.501499	0.369135	0.355313
ENSG00000274419.5	TBC1D3D	0.448529	0.355016	0.324913	0.133239
ENSG00000260121.1	RP5-1142A6.9	0.447645	0.377123	0.349434	0.181852
ENSG00000117000.8	RLF	0.447081	0.29766	0.340539	0.346387
ENSG00000111752.10	PHC1	0.445356	0.254474	0.401252	0.273518
ENSG00000205903.6	ZNF316	0.443919	0.328985	0.351423	0.14465
ENSG00000148358.19	GPR107	0.44383	0.257315	0.344232	0.168693
ENSG00000177853.14	ZNF518A	0.443017	0.355151	0.446879	0.470404
ENSG00000274512.4	TBC1D3L	0.441688	0.445555	0.40007	0.186908
ENSG00000172932.14	ANKRD13D	0.441555	0.501209	0.338926	0.331667
ENSG00000264701.1	RP11-6N17.10	0.441214	0.283422	0.416155	0.234094
ENSG00000187764.11	SEMA4D	0.440523	0.316457	0.425799	0.298724
ENSG00000161204.11	ABCF3	0.439487	0.269216	0.353201	0.102621
ENSG00000122482.20	ZNF644	0.439197	0.393102	0.359738	0.516529
ENSG00000067182.7	TNFRSF1A	0.439105	0.419522	0.375105	0.388335
ENSG00000281691.1	RBM5-AS1	0.438579	0.240917	0.302798	0.155307
ENSG00000263766.5	RP11-580I16.2	0.437377	0.312949	0.343841	0.169374
ENSG00000125447.16	GGA3	0.436089	0.297855	0.339775	0.10507
ENSG00000148343.18	FAM73B	0.434336	0.439898	0.347353	0.180397
ENSG00000261052.5	SULT1A3	0.433724	0.352988	0.322304	0.242553
ENSG00000274627.1	RP11-104N10.2	0.432573	0.319079	0.378613	0.153551
ENSG00000112079.8	STK38	0.431384	0.325205	0.370552	0.253299
ENSG00000213648.10	SULT1A4	0.428097	0.353963	0.317472	0.242725
ENSG00000172943.18	PHF8	0.425844	0.244988	0.37018	0.174103
ENSG00000039650.9	PNKP	0.425679	0.312295	0.405329	0.18971
ENSG00000198925.10	ATG9A	0.423353	0.410479	0.30892	0.15776
ENSG00000117155.16	SSX2IP	0.423342	0.165017	0.478837	0.499906
ENSG00000162929.13	KIAA1841	0.423296	0.119595	0.33228	0.312872
ENSG00000112182.14	BACH2	0.421642	0.224564	0.429645	0.313326
ENSG00000128563.13	PRKRIP1	0.421521	0.373825	0.315229	0.142034
ENSG00000173482.16	PTPRM	0.420583	0.37261	0.424794	0.114215
ENSG00000173153.13	ESRRA	0.420444	0.124804	0.479147	0.172394
ENSG00000010322.15	NISCH	0.420366	0.442722	0.355543	0.11803
ENSG00000080200.9	CRYBG3	0.419878	0.38309	0.406995	0.465011
ENSG00000090238.11	YPEL3	0.418985	0.329613	0.321483	0.192346
ENSG00000158109.14	TPRG1L	0.418241	0.19114	0.318488	0.128869
ENSG00000179406.6	LINC00174	0.417848	0.557471	0.365213	0.291838
ENSG00000160796.16	NBEAL2	0.417569	0.282863	0.332114	0.119924
ENSG00000077254.14	USP33	0.41755	0.17446	0.331085	0.30612
ENSG00000214655.10	ZSWIM8	0.417528	0.489878	0.309406	0.18354
ENSG00000107021.15	TBC1D13	0.416878	0.285693	0.343278	0.111371
ENSG00000132017.10	DCAF15	0.414707	0.312734	0.331562	0.166215
ENSG00000103335.19	PIEZO1	0.413767	0.425838	0.324354	0.1073
ENSG00000146587.17	RBAK	0.413349	0.374046	0.397957	0.348458
ENSG00000051009.10	FAM160A2	0.41238	0.406354	0.323774	0.173962
ENSG00000274226.5	TBC1D3H	0.411871	0.316538	0.30947	0.115211
ENSG00000139055.6	ERP27	0.407496	0.381235	0.443211	0.317123
ENSG00000088179.8	PTPN4	0.406941	0.116905	0.300007	0.363557
ENSG00000143373.17	ZNF687	0.405884	0.437002	0.378249	0.235909
ENSG00000270015.1	RP11-540B6.6	0.405767	0.312222	0.33788	0.120546
ENSG00000154889.16	MPPE1	0.40334	0.346916	0.40835	0.333651
ENSG00000203485.12	INF2	0.402169	0.278507	0.351834	0.200176
ENSG00000213523.9	SRA1	0.400965	0.370566	0.309751	0.195584
ENSG00000160584.15	SIK3	0.398822	0.378871	0.410073	0.192094
ENSG00000103496.14	STX4	0.398462	0.429419	0.338958	0.23869
ENSG00000232774.7	FLJ22447	0.397748	0.201718	0.328874	0.160733
ENSG00000164506.14	STXBP5	0.397607	0.215184	0.411544	0.501336
ENSG00000136271.10	DDX56	0.395664	0.293768	0.381607	0.1648
ENSG00000111877.17	MCM9	0.394481	0.11247	0.306192	0.100877
ENSG00000072778.19	ACADVL	0.393458	0.319378	0.309445	0.171505
ENSG00000149187.17	CELF1	0.390365	0.283479	0.32648	0.286853
ENSG00000100242.15	SUN2	0.390005	0.455269	0.338705	0.247789
ENSG00000204116.11	CHIC1	0.386669	0.195531	0.330273	0.340669
ENSG00000185989.10	RASA3	0.385827	0.230837	0.382028	0.114689
ENSG00000141404.15	GNAL	0.385043	0.219798	0.419298	0.284237
ENSG00000114302.15	PRKAR2A	0.384206	0.269444	0.502303	0.458008
ENSG00000225450.1	RP3-508I15.14	0.382365	0.49184	0.358571	0.1588
ENSG00000065802.11	ASB1	0.380484	0.132127	0.453525	0.105707
ENSG00000019995.6	ZRANB1	0.380364	0.140651	0.31396	0.202572
ENSG00000003756.16	RBM5	0.379421	0.262047	0.302795	0.109397
ENSG00000166908.17	PIP4K2C	0.377488	0.334103	0.348412	0.222656
ENSG00000008128.22	CDK11A	0.373147	0.183777	0.366086	0.143073
ENSG00000281991.1	TMEM265	0.372603	0.127034	0.425211	0.172488
ENSG00000141179.13	PCTP	0.371674	0.221619	0.319654	0.123082
ENSG00000109381.19	ELF2	0.369158	0.161007	0.332631	0.296367
ENSG00000198863.7	RUNDC1	0.368575	0.138496	0.311158	0.183112
ENSG00000123124.13	WWP1	0.351403	0.247702	0.302558	0.334319
ENSG00000163249.9	CCNYL1	0.351165	0.432173	0.433839	0.570128
ENSG00000080298.15	RFX3	0.348984	0.310513	0.665659	0.52563
ENSG00000000971.15	CFH	0.345505	0.106941	0.5452	0.359333
ENSG00000280211.1	RP11-2C24.3	0.34445	0.164377	0.403519	0.127768
ENSG00000011021.21	CLCN6	0.34436	0.36691	0.304137	0.12994
ENSG00000107560.10	RAB11FIP2	0.344133	0.338576	0.323555	0.586538
ENSG00000135823.13	STX6	0.342536	0.131918	0.309286	0.196863
ENSG00000248333.8	CDK11B	0.341318	0.136764	0.33963	0.112215
ENSG00000138081.19	FBXO11	0.339857	0.289708	0.321513	0.415636
ENSG00000260804.3	PKI55	0.336829	0.309268	0.417802	0.29928
ENSG00000251022.6	THAP9-AS1	0.328049	0.105258	0.36349	0.323795
ENSG00000177169.9	ULK1	0.323341	0.328398	0.309204	0.115827
ENSG00000133794.17	ARNTL	0.322256	0.281577	0.383085	0.335498
ENSG00000100461.17	RBM23	0.320683	0.329955	0.352958	0.33718
ENSG00000149257.13	SERPINH1	0.318268	0.300726	0.309901	0.189283
ENSG00000105520.10	PLPPR2	0.318224	0.48599	0.396895	0.267684
ENSG00000120889.12	TNFRSF10B	0.317266	0.193502	0.379933	0.151413
ENSG00000272851.1	RP11-801F7.1	0.315333	0.287983	0.390852	0.693344
ENSG00000188234.13	AGAP4	0.314665	0.254495	0.340276	0.17522
ENSG00000124374.8	PAIP2B	0.31209	0.56792	0.471069	0.577622
ENSG00000152520.13	PAN3	0.307591	0.168573	0.348381	0.313775
ENSG00000182109.7	RP11-69E11.4	0.306928	0.127733	0.481822	0.145933
ENSG00000142347.16	MYO1F	0.306693	0.359053	0.443407	0.314261
ENSG00000183889.12	AC138969.4	0.301117	0.216406	0.315946	0.186499
ENSG00000233024.7	RP11-1212A22.4	0.30053	0.230214	0.307219	0.167258
ENSG00000223865.10	HLA-DPB1	-0.315274	-0.658529	-0.347346	-0.75258
ENSG00000131323.14	TRAF3	-0.317361	-0.103829	-0.340711	-0.323397
ENSG00000100097.11	LGALS1	-0.319966	-0.427276	-0.323009	-0.249678
ENSG00000129226.13	CD68	-0.321069	-0.193684	-0.309892	-0.549218
ENSG00000140284.10	SLC27A2	-0.324196	-0.274611	-0.361351	-0.111342
ENSG00000089692.8	LAG3	-0.326437	-0.334219	-0.326605	-0.388731
ENSG00000282851.1	BISPR	-0.328129	-0.220689	-0.589115	-0.474494
ENSG00000131089.13	ARHGEF9	-0.328462	-0.241872	-0.334857	-0.430212
ENSG00000226950.6	DANCR	-0.328481	-0.169507	-0.307488	-0.292812
ENSG00000272502.1	RP11-713M15.2	-0.330407	-0.528738	-0.496619	-0.607483
ENSG00000166750.9	SLFN5	-0.337688	-0.213623	-0.438936	-0.181426
ENSG00000162073.13	PAQR4	-0.340698	-0.21817	-0.409251	-0.326322
ENSG00000176912.3	TYMSOS	-0.345753	-0.475342	-0.420978	-0.159649
ENSG00000163568.13	AIM2	-0.347469	-0.291769	-0.478922	-0.478639
ENSG00000223534.1	HLA-DQB1-AS1	-0.347591	-0.760733	-0.302729	-0.578745
ENSG00000142694.6	EVA1B	-0.351612	-0.278581	-0.457032	-0.103261
ENSG00000099194.5	SCD	-0.352076	-0.209515	-0.833798	-0.164354
ENSG00000243989.7	ACY1	-0.366034	-0.311587	-0.306189	-0.179902
ENSG00000261801.5	LOXL1-AS1	-0.369584	-0.358973	-0.321396	-0.220016
ENSG00000196735.11	HLA-DQA1	-0.371099	-0.949401	-0.715431	-0.927311
ENSG00000091409.14	ITGA6	-0.37182	-0.367422	-0.479898	-0.295541
ENSG00000216490.3	IFI30	-0.377985	-0.1502	-0.448359	-0.369177
ENSG00000171813.13	PWWP2B	-0.378328	-0.235453	-0.416141	-0.325536
ENSG00000147443.12	DOK2	-0.380844	-0.271875	-0.337863	-0.11336
ENSG00000117228.9	GBP1	-0.385931	-0.324232	-0.650865	-0.487442
ENSG00000130303.12	BST2	-0.394743	-0.209512	-0.547495	-0.468107
ENSG00000154165.4	GPR15	-0.396372	-0.222983	-0.376616	-0.338183
ENSG00000228594.3	C1orf233	-0.397354	-0.292161	-0.540483	-0.18385
ENSG00000126767.17	ELK1	-0.403855	-0.125682	-0.416849	-0.261174
ENSG00000143222.11	UFC1	-0.404599	-0.332255	-0.462751	-0.244779
ENSG00000183813.6	CCR4	-0.406005	-0.532948	-0.524574	-0.537868
ENSG00000171843.15	MLLT3	-0.407507	-0.222752	-0.866623	-0.176039
ENSG00000166228.8	PCBD1	-0.407654	-0.293714	-0.67172	-0.190476
ENSG00000166503.8	RP11-382A20.3	-0.417037	-0.60164	-0.692246	-0.17943
ENSG00000099860.8	GADD45B	-0.4175	-0.2222	-0.32502	-0.389821
ENSG00000167900.11	TK1	-0.423703	-0.713126	-0.531582	-0.477252
ENSG00000114978.17	MOB1A	-0.424977	-0.389774	-0.465206	-0.181668
ENSG00000114779.19	ABHD14B	-0.425461	-0.139939	-0.401641	-0.207622
ENSG00000169100.13	SLC25A6	-0.42775	-0.199509	-0.68544	-0.499108
ENSGR0000169100.13	SLC25A6	-0.42775	-0.199509	-0.68544	-0.499108
ENSG00000145022.4	TCTA	-0.427765	-0.449364	-0.58857	-0.617209
ENSG00000227507.2	LTB	-0.428438	-0.400991	-0.647136	-0.407108
ENSG00000278195.1	SSTR3	-0.432286	-0.285032	-0.809958	-0.773185
ENSG00000239264.8	TXNDC5	-0.435147	-0.208246	-0.584763	-0.130428
ENSG00000280334.1	RP11-361L15.5	-0.444304	-0.351928	-0.4175	-0.288478
ENSG00000186810.7	CXCR3	-0.445526	-0.282826	-0.331279	-0.318188
ENSG00000076248.10	UNG	-0.446432	-0.269122	-0.42363	-0.108653
ENSG00000028137.16	TNFRSF1B	-0.449853	-0.23847	-0.325366	-0.226682
ENSG00000171777.15	RASGRP4	-0.451618	-0.18459	-0.657787	-0.600338
ENSG00000184489.11	PTP4A3	-0.452421	-0.438611	-0.473466	-0.336803
ENSG00000277192.1	RP11-89G4.1	-0.457355	-0.305162	-0.467699	-0.318283
ENSG00000084754.10	HADHA	-0.4599	-0.410648	-0.569731	-0.492727
ENSG00000071539.13	TRIP13	-0.461474	-0.666447	-0.463765	-0.445905
ENSG00000216895.8	AC009403.2	-0.464023	-0.140466	-0.357597	-0.209838
ENSG00000184009.9	ACTG1	-0.466185	-0.159033	-0.373841	-0.125066
ENSG00000198502.5	HLA-DRB5	-0.466854	-1.14515	-0.356124	-0.909845
ENSG00000179344.16	HLA-DQB1	-0.467115	-0.852459	-0.413154	-0.808452
ENSG00000147883.10	CDKN2B	-0.467756	-0.647363	-0.405501	-0.207981
ENSG00000186827.10	TNFRSF4	-0.474181	-0.175865	-0.361489	-0.101952
ENSG00000185262.8	UBALD2	-0.483776	-0.457925	-0.303842	-0.301114
ENSG00000232533.1	AC093673.5	-0.489783	-0.220042	-0.441009	-0.299826
ENSG00000255221.2	CARD17	-0.4909	-0.396405	-0.715218	-0.658173
ENSG00000231682.1	AC097713.4	-0.497507	-0.184251	-0.493955	-0.131847
ENSG00000086598.10	TMED2	-0.50224	-0.283615	-0.636391	-0.150789
ENSG00000173113.6	TRMT112	-0.504295	-0.357874	-0.559899	-0.370006
ENSG00000164649.19	CDCA7L	-0.510387	-0.198058	-0.726464	-0.503788
ENSG00000172725.13	CORO1B	-0.511953	-0.207371	-0.622735	-0.249929
ENSG00000185201.16	IFITM2	-0.514446	-0.196646	-0.543701	-0.15765
ENSG00000203668.1	CHML	-0.517875	-0.261377	-0.709024	-0.127383
ENSG00000204287.13	HLA-DRA	-0.541318	-1.23549	-0.574018	-1.0488
ENSG00000231721.6	LINC-PINT	-0.54954	-0.214601	-0.456531	-0.233055
ENSG00000130590.13	SAMD10	-0.552579	-0.172722	-0.552714	-0.181692
ENSG00000134460.15	IL2RA	-0.55395	-0.302229	-0.632206	-0.271799
ENSG00000245164.6	LINC00861	-0.553963	-0.394982	-0.55733	-0.416912
ENSG00000172543.7	CTSW	-0.55406	-0.578162	-0.400158	-0.385163
ENSG00000233093.5	LINC00892	-0.584735	-0.830326	-0.625086	-0.71807
ENSG00000183153.6	GJD3	-0.585434	-0.167511	-0.530396	-0.514782
ENSG00000106682.14	EIF4H	-0.586512	-0.499339	-0.618386	-0.556177
ENSG00000197006.13	METTL9	-0.5905	-0.241271	-0.683884	-0.150776
ENSG00000175567.8	UCP2	-0.592079	-0.210461	-0.531954	-0.389837
ENSG00000271856.1	LINC01215	-0.598444	-0.359341	-0.792726	-0.536651
ENSG00000276043.4	UHRF1	-0.603167	-0.632124	-0.507182	-0.229175
ENSG00000075785.12	RAB7A	-0.603328	-0.228916	-0.613269	-0.197236
ENSG00000228716.6	DHFR	-0.613508	-0.690988	-0.663479	-0.329524
ENSG00000188021.8	UBQLN2	-0.615615	-0.397769	-0.489094	-0.164357
ENSG00000069399.12	BCL3	-0.619718	-0.139022	-0.526505	-0.200309
ENSG00000172824.14	CES4A	-0.623668	-0.349208	-0.605839	-0.422978
ENSG00000116649.9	SRM	-0.627634	-0.348117	-0.727632	-0.550701
ENSG00000143507.17	DUSP10	-0.638524	-0.210878	-0.394936	-0.236293
ENSG00000147889.16	CDKN2A	-0.64184	-0.590863	-0.389871	-0.44661
ENSG00000177494.5	ZBED2	-0.654652	-0.526858	-0.601763	-0.729891
ENSG00000173218.14	VANGL1	-0.654917	-0.116432	-0.793767	-0.118319
ENSG00000130164.11	LDLR	-0.662105	-0.522665	-0.599878	-0.507786
ENSG00000257453.1	RP11-290L1.3	-0.665084	-0.302457	-0.754793	-0.4494
ENSG00000270557.1	RP11-546J1.1	-0.666791	-0.333576	-0.385027	-0.164951
ENSG00000049768.14	FOXP3	-0.677535	-0.527601	-0.668853	-0.515637
ENSG00000115415.18	STAT1	-0.682618	-0.494634	-0.934264	-0.672077
ENSG00000090339.8	ICAM1	-0.683375	-0.430654	-0.705863	-0.594122
ENSG00000151690.14	MFSD6	-0.697508	-0.408948	-0.599756	-0.415894
ENSG00000147955.16	SIGMAR1	-0.705629	-0.295855	-0.816339	-0.50064
ENSG00000100298.15	APOBEC3H	-0.717575	-0.170123	-0.402375	-0.127096
ENSG00000276116.2	FUT8-AS1	-0.723042	-0.153113	-0.599219	-0.263043
ENSG00000184557.4	SOCS3	-0.766629	-0.719984	-0.433036	-0.321623
ENSG00000139289.13	PHLDA1	-0.809275	-0.492126	-0.889135	-0.427784
ENSG00000092964.16	DPYSL2	-0.823541	-0.519491	-0.61781	-0.315182
ENSG00000266208.1	CTD-2267D19.3	-0.826296	-0.472219	-0.805535	-0.663775
ENSG00000277511.1	CTD-2095E4.5	-0.827112	-0.173109	-0.906406	-0.466095
ENSG00000279108.1	CTC-490E21.11	-0.870525	-0.453235	-0.609139	-0.180414
ENSG00000146674.14	IGFBP3	-0.903314	-0.456217	-0.639846	-0.444682
ENSG00000245532.5	NEAT1	-0.912233	-0.192266	-0.837176	-0.423996
ENSG00000196126.10	HLA-DRB1	-0.930593	-0.897495	-0.785684	-0.795071
ENSG00000170476.15	MZB1	-0.954517	-1.25822	-1.22571	-1.02494
ENSG00000170522.9	ELOVL6	-0.97908	-0.439483	-0.980853	-0.278062
ENSG00000183134.4	PTGDR2	-1.04901	-0.536647	-1.15186	-0.479224
ENSG00000107317.11	PTGDS	-1.12885	-0.296647	-0.776498	-0.105371
ENSG00000077984.5	CST7	-1.18708	-0.454293	-0.505398	-0.204882
ENSG00000069869.15	NEDD4	-1.19769	-0.369061	-0.686696	-0.296733
ENSG00000266088.5	RP5-1028K7.2	-1.22444	-0.736882	-1.19774	-0.540616
ENSG00000135318.11	NT5E	-1.26986	-0.649318	-1.15762	-0.545882
ENSG00000274021.1	RP11-823E8.3	-1.30696	-0.73241	-0.49369	-0.153661
ENSG00000120738.7	EGR1	-1.35062	-0.707645	-0.96944	-0.674605
ENSG00000198563.13	DDX39B	-1.45119	-0.103808	-1.3145	-0.346774
