# Supplementary material for: The RNA helicase DDX39B activates FOXP3 RNA splicing to control T regulatory cell fate
Source: eLife. 2023 Jun 1;12:e76927. doi: 10.7554/eLife.76927 (PMC10234631; doi:10.7554/eLife.76927)
Supplement: Supplementary file 2. — Related to Figure 1 and Figure 1—figure supplement 1. [file elife-76927-supp2.xlsx]

## Sheet: 2RPKM_D1andD4-Sh3(03)
Supplementary file 2. Differentially expressed genes after DDX39B-depletion (Sh3) observed in both donors. Related to Figure 1 and figure 1-figure supplement 1.
ENS_name	GENECODE gene_name	Score_Donor1_Sh3	Score_Donor4_Sh3
ENSG00000262202.4	RP11-160E2.6	1.94615	1.7165
ENSG00000198417.6	MT1F	1.49241	1.19686				Up	Down	Total
ENSG00000140465.13	CYP1A1	1.40317	1.19629			Differential expressed genes	426	336	762
ENSG00000005379.15	BZRAP1	1.34563	1.52773
ENSG00000166963.12	MAP1A	1.24022	0.706875
ENSG00000134709.10	HOOK1	1.20984	0.976915
ENSG00000104936.17	DMPK	1.20206	1.11223
ENSG00000090382.6	LYZ	1.13706	0.646703
ENSG00000177606.6	JUN	1.07648	0.886925
ENSG00000169715.14	MT1E	1.0661	0.969781
ENSG00000267395.5	AC074212.6	1.06239	0.61888
ENSG00000166987.14	MBD6	1.04871	0.848216
ENSG00000257764.2	RP11-1143G9.4	1.04507	0.591723
ENSG00000179899.8	PHC1P1	1.01232	0.806289
ENSG00000185800.11	DMWD	0.997074	0.615994
ENSG00000275395.4	FCGBP	0.933834	0.65266
ENSG00000151692.14	RNF144A	0.911458	0.656382
ENSG00000134982.16	APC	0.905264	0.676423
ENSG00000117643.14	MAN1C1	0.893116	0.478429
ENSG00000213976.4	CTD-2561J22.2	0.881403	0.552492
ENSG00000206530.8	CFAP44	0.870532	0.718764
ENSG00000261375.1	RP11-632K20.6	0.865803	0.703456
ENSG00000115657.12	ABCB6	0.863139	0.597702
ENSG00000120129.5	DUSP1	0.852057	0.81744
ENSG00000127184.10	COX7C	0.837008	0.588197
ENSG00000157514.16	TSC22D3	0.835725	0.579805
ENSG00000142173.14	COL6A2	0.83528	0.313354
ENSG00000064547.13	LPAR2	0.833873	0.768164
ENSG00000109063.14	MYH3	0.828848	0.685661
ENSG00000135437.9	RDH5	0.826861	0.926389
ENSG00000007516.13	BAIAP3	0.80872	0.670871
ENSG00000100292.16	HMOX1	0.800092	0.769959
ENSG00000138449.10	SLC40A1	0.798577	0.482641
ENSG00000125148.6	MT2A	0.781976	0.709048
ENSG00000092529.22	CAPN3	0.776668	0.626521
ENSG00000260784.1	AC026150.6	0.776626	0.867698
ENSG00000181555.19	SETD2	0.769	0.551257
ENSG00000260549.1	MT1L	0.763654	0.49483
ENSG00000105245.9	NUMBL	0.762483	0.625987
ENSG00000144674.16	GOLGA4	0.757627	0.74874
ENSG00000151233.10	GXYLT1	0.754378	0.564172
ENSG00000176749.8	CDK5R1	0.750664	0.62461
ENSG00000138413.13	IDH1	0.747325	0.496998
ENSG00000254912.2	RP11-632K20.2	0.730561	0.630386
ENSG00000239775.1	AC017116.11	0.722679	0.485067
ENSG00000164708.5	PGAM2	0.719688	0.473212
ENSG00000248334.6	WHAMMP2	0.703922	0.38717
ENSG00000113360.16	DROSHA	0.696882	0.549241
ENSG00000161996.17	WDR90	0.690637	0.532863
ENSG00000110721.11	CHKA	0.686421	0.392872
ENSG00000273188.1	RP3-402G11.25	0.68318	0.367181
ENSG00000109787.12	KLF3	0.68184	0.346767
ENSG00000146757.13	ZNF92	0.680011	0.316557
ENSG00000085465.12	OVGP1	0.673486	0.747144
ENSG00000143387.12	CTSK	0.672763	0.955859
ENSG00000065526.10	SPEN	0.669558	0.370409
ENSG00000047634.14	SCML1	0.667034	0.558612
ENSG00000111676.14	ATN1	0.666998	0.536671
ENSG00000130810.19	PPAN	0.666122	0.314129
ENSG00000258352.1	RP11-23J18.1	0.665878	0.73228
ENSG00000135127.11	CCDC64	0.662876	0.482041
ENSG00000196247.11	ZNF107	0.660755	0.613218
ENSG00000264112.1	RP11-159D12.2	0.660181	0.801141
ENSG00000100852.12	ARHGAP5	0.658082	0.429155
ENSG00000112303.13	VNN2	0.652304	0.337566
ENSG00000101350.7	KIF3B	0.646198	0.589104
ENSG00000260948.1	RP11-552M11.8	0.64356	0.405853
ENSG00000006459.10	KDM7A	0.642216	0.444335
ENSG00000118965.14	WDR35	0.633948	0.687729
ENSG00000111229.15	ARPC3	0.633627	0.478945
ENSG00000116539.10	ASH1L	0.63205	0.512491
ENSG00000095951.16	HIVEP1	0.623473	0.38156
ENSG00000118412.12	CASP8AP2	0.621976	0.336069
ENSG00000255031.5	RP11-802E16.3	0.621972	0.407054
ENSG00000187193.8	MT1X	0.620084	0.946935
ENSG00000270127.2	RP11-526I2.5	0.619196	0.495099
ENSG00000101745.15	ANKRD12	0.618221	0.749389
ENSG00000226423.1	AC093642.4	0.617673	0.597129
ENSG00000250067.11	YJEFN3	0.614521	0.55355
ENSG00000186174.12	BCL9L	0.613885	0.32206
ENSG00000127125.8	PPCS	0.611269	0.523306
ENSG00000123360.11	PDE1B	0.610127	0.76612
ENSG00000100918.12	REC8	0.601106	0.779295
ENSG00000113319.11	RASGRF2	0.601036	0.542508
ENSG00000279658.1	RP11-389G6.4	0.600577	0.331551
ENSG00000141540.10	TTYH2	0.598545	0.500832
ENSG00000265972.5	TXNIP	0.597966	0.438893
ENSG00000177383.4	MAGEF1	0.594384	0.508597
ENSG00000170385.9	SLC30A1	0.59375	0.361926
ENSG00000149503.12	INCENP	0.58988	0.415497
ENSG00000168071.21	CCDC88B	0.586756	0.419129
ENSG00000112110.9	MRPL18	0.584542	0.305831
ENSG00000269352.1	PTOV1-AS2	0.580164	0.484919
ENSG00000173230.15	GOLGB1	0.575883	0.409492
ENSG00000121671.11	CRY2	0.573668	0.512468
ENSG00000166326.6	TRIM44	0.573013	0.391599
ENSG00000221978.11	CCNL2	0.568039	0.399231
ENSG00000034053.14	APBA2	0.567913	0.543767
ENSG00000233184.6	RP11-421L21.3	0.567142	0.345678
ENSG00000102547.18	CAB39L	0.565905	0.460905
ENSG00000124074.11	ENKD1	0.565587	0.570867
ENSG00000258515.1	RP11-203M5.7	0.563355	0.354555
ENSG00000109854.13	HTATIP2	0.56295	0.3675
ENSG00000116852.14	KIF21B	0.562941	0.30285
ENSG00000127366.5	TAS2R5	0.561996	0.59039
ENSG00000101247.17	NDUFAF5	0.556099	0.425021
ENSG00000255389.1	C6orf3	0.554332	0.604528
ENSG00000102531.16	FNDC3A	0.550419	0.406649
ENSG00000253476.1	RP11-395I14.2	0.550264	0.330969
ENSG00000214174.8	AMZ2P1	0.549003	0.361146
ENSG00000160305.17	DIP2A	0.547213	0.367461
ENSG00000154945.6	ANKRD40	0.546656	0.539044
ENSG00000135205.14	CCDC146	0.544372	0.431176
ENSG00000205702.10	CYP2D7	0.542934	0.526058
ENSG00000173575.18	CHD2	0.540763	0.403653
ENSG00000227372.10	TP73-AS1	0.540748	0.495499
ENSG00000181045.14	SLC26A11	0.53943	0.365124
ENSG00000089639.10	GMIP	0.539021	0.335328
ENSG00000132359.13	RAP1GAP2	0.538496	0.595723
ENSG00000179010.14	MRFAP1	0.535418	0.445353
ENSG00000261373.1	VPS9D1-AS1	0.534955	0.376726
ENSG00000124103.8	FAM209A	0.532279	0.4617
ENSG00000073331.17	ALPK1	0.532151	0.353495
ENSG00000173020.10	ADRBK1	0.532121	0.420468
ENSG00000174243.9	DDX23	0.53145	0.445133
ENSG00000078487.17	ZCWPW1	0.529223	0.37829
ENSG00000026652.13	AGPAT4	0.528929	0.578973
ENSG00000136153.19	LMO7	0.52749	0.336324
ENSG00000009335.17	UBE3C	0.52305	0.340961
ENSG00000108465.14	CDK5RAP3	0.520708	0.515661
ENSG00000108509.20	CAMTA2	0.520518	0.429625
ENSG00000183530.13	PRR14L	0.519339	0.351312
ENSG00000280407.2	RP13-516M14.8	0.518851	0.309733
ENSG00000105397.13	TYK2	0.518097	0.360308
ENSG00000109572.13	CLCN3	0.516782	0.390558
ENSG00000100151.15	PICK1	0.515312	0.470218
ENSG00000172819.16	RARG	0.514398	0.32662
ENSG00000104960.15	PTOV1	0.513887	0.314567
ENSG00000272333.5	KMT2B	0.513819	0.326101
ENSG00000182685.7	BRICD5	0.513281	0.416993
ENSG00000188185.11	LINC00265	0.513231	0.582443
ENSG00000068697.6	LAPTM4A	0.512788	0.37927
ENSG00000213799.10	ZNF845	0.512189	0.31138
ENSG00000257027.1	RP11-705C15.3	0.511127	0.58333
ENSG00000090372.14	STRN4	0.507453	0.408358
ENSG00000188636.3	LDOC1L	0.506734	0.326599
ENSG00000261490.1	RP11-448G15.3	0.506053	0.512957
ENSG00000159753.13	RLTPR	0.505028	0.362619
ENSG00000130787.13	HIP1R	0.504458	0.384553
ENSG00000096433.10	ITPR3	0.503803	0.380134
ENSG00000158805.11	ZNF276	0.503785	0.341461
ENSG00000161013.16	MGAT4B	0.503685	0.347502
ENSG00000279155.1	LL0XNC01-36H8.1	0.50302	0.325538
ENSG00000176868.2	RP11-334J6.7	0.502851	0.427921
ENSG00000012779.10	ALOX5	0.502405	0.400054
ENSG00000163428.3	LRRC58	0.502353	0.338372
ENSG00000137500.9	CCDC90B	0.501684	0.327731
ENSG00000258034.1	RP11-493P1.2	0.500495	0.303973
ENSG00000063245.14	EPN1	0.499521	0.414353
ENSG00000270194.1	RP11-259K5.2	0.499172	0.368491
ENSG00000197603.13	C5orf42	0.498478	0.37763
ENSG00000170638.9	TRABD	0.497952	0.513388
ENSG00000141279.15	NPEPPS	0.497165	0.368398
ENSG00000100441.9	KHNYN	0.49708	0.375081
ENSG00000179094.13	PER1	0.494832	0.401878
ENSG00000102225.15	CDK16	0.493747	0.36391
ENSG00000149091.15	DGKZ	0.492965	0.486981
ENSG00000110719.9	TCIRG1	0.492494	0.470027
ENSG00000127511.9	SIN3B	0.491818	0.373603
ENSG00000197892.12	KIF13B	0.491615	0.44774
ENSG00000146830.9	GIGYF1	0.491276	0.344298
ENSG00000161912.17	ADCY10P1	0.491186	0.53902
ENSG00000244257.5	PKD1P1	0.490967	0.337422
ENSG00000139574.8	NPFF	0.490434	0.756222
ENSG00000169239.12	CA5B	0.489285	0.365569
ENSG00000177728.14	TMEM94	0.488523	0.463895
ENSG00000120662.15	MTRF1	0.486853	0.381697
ENSG00000146350.13	TBC1D32	0.486108	0.534889
ENSG00000205746.9	RP11-1212A22.1	0.485329	0.30167
ENSG00000196352.14	CD55	0.485246	0.358166
ENSG00000163157.14	TMOD4	0.485045	0.38533
ENSG00000262967.1	RP11-294J22.6	0.484517	0.463418
ENSG00000147231.13	CXorf57	0.483223	0.550393
ENSG00000278299.4	TBC1D3C	0.482584	0.394303
ENSG00000129347.19	KRI1	0.482476	0.414841
ENSG00000116157.5	GPX7	0.4817	0.302664
ENSG00000183458.13	RP11-958N24.1	0.479495	0.309063
ENSG00000163482.11	STK36	0.478663	0.452643
ENSG00000092148.12	HECTD1	0.47857	0.316389
ENSG00000135315.11	CEP162	0.478431	0.438767
ENSG00000260973.1	RP11-105C19.2	0.477879	0.414126
ENSG00000229659.1	RP11-345K20.2	0.47754	0.410328
ENSG00000167778.8	SPRYD3	0.476321	0.349096
ENSG00000100815.12	TRIP11	0.476264	0.328581
ENSG00000154059.9	IMPACT	0.474041	0.309658
ENSG00000160683.4	CXCR5	0.473579	0.333194
ENSG00000146828.17	SLC12A9	0.47337	0.368093
ENSG00000166860.2	ZBTB39	0.470837	0.328387
ENSG00000164114.18	MAP9	0.469636	0.636645
ENSG00000158769.17	F11R	0.468899	0.565874
ENSG00000240053.8	LY6G5B	0.468632	0.499529
ENSG00000115216.13	NRBP1	0.468485	0.332764
ENSG00000117758.13	STX12	0.467004	0.394606
ENSG00000186088.15	GSAP	0.466956	0.484513
ENSG00000164880.15	INTS1	0.466782	0.321083
ENSG00000177084.16	POLE	0.466157	0.307706
ENSG00000152193.7	RNF219	0.466059	0.322046
ENSG00000227077.3	AC107983.4	0.46503	0.442369
ENSG00000115307.16	AUP1	0.463589	0.317417
ENSG00000248124.7	RRN3P1	0.460671	0.378047
ENSG00000257550.1	RP11-793H13.3	0.460657	0.310009
ENSG00000139636.15	LMBR1L	0.459456	0.439627
ENSG00000141551.14	CSNK1D	0.459359	0.309937
ENSG00000258441.1	LINC00641	0.459167	0.542828
ENSG00000235333.3	PVRIG2P	0.459072	0.359529
ENSG00000143772.9	ITPKB	0.458667	0.366194
ENSG00000139644.12	TMBIM6	0.458063	0.359778
ENSG00000128159.11	TUBGCP6	0.457936	0.320185
ENSG00000204305.13	AGER	0.456642	0.319592
ENSG00000008838.17	MED24	0.454086	0.321186
ENSG00000140474.12	ULK3	0.453177	0.453755
ENSG00000115548.16	KDM3A	0.452964	0.35888
ENSG00000226744.1	AC079781.5	0.452006	0.438977
ENSG00000185359.12	HGS	0.451709	0.459662
ENSG00000110888.17	CAPRIN2	0.451096	0.369135
ENSG00000163577.7	EIF5A2	0.450471	0.348269
ENSG00000153790.11	C7orf31	0.448896	0.452828
ENSG00000274419.5	TBC1D3D	0.448529	0.324913
ENSG00000204149.9	AGAP6	0.448184	0.380245
ENSG00000165410.14	CFL2	0.447863	0.365095
ENSG00000260121.1	RP5-1142A6.9	0.447645	0.349434
ENSG00000117000.8	RLF	0.447081	0.340539
ENSG00000163597.14	SNHG16	0.445711	0.427173
ENSG00000111752.10	PHC1	0.445356	0.401252
ENSG00000150054.18	MPP7	0.444698	0.457651
ENSG00000205903.6	ZNF316	0.443919	0.351423
ENSG00000148358.19	GPR107	0.44383	0.344232
ENSG00000103549.21	RNF40	0.443697	0.341058
ENSG00000177853.14	ZNF518A	0.443017	0.446879
ENSG00000114383.9	TUSC2	0.441827	0.366848
ENSG00000274512.4	TBC1D3L	0.441688	0.40007
ENSG00000172932.14	ANKRD13D	0.441555	0.338926
ENSG00000264701.1	RP11-6N17.10	0.441214	0.416155
ENSG00000278259.4	MYO19	0.440652	0.33194
ENSG00000187764.11	SEMA4D	0.440523	0.425799
ENSG00000184445.11	KNTC1	0.44045	0.302335
ENSG00000161204.11	ABCF3	0.439487	0.353201
ENSG00000122482.20	ZNF644	0.439197	0.359738
ENSG00000067182.7	TNFRSF1A	0.439105	0.375105
ENSG00000281691.1	RBM5-AS1	0.438579	0.302798
ENSG00000082269.16	FAM135A	0.437597	0.443212
ENSG00000263766.5	RP11-580I16.2	0.437377	0.343841
ENSG00000273253.2	RP3-402G11.26	0.436806	0.465198
ENSG00000125447.16	GGA3	0.436089	0.339775
ENSG00000076928.17	ARHGEF1	0.435814	0.371804
ENSG00000148343.18	FAM73B	0.434336	0.347353
ENSG00000261052.5	SULT1A3	0.433724	0.322304
ENSG00000198932.12	GPRASP1	0.433501	0.496241
ENSG00000213445.8	SIPA1	0.433351	0.32824
ENSG00000274627.1	RP11-104N10.2	0.432573	0.378613
ENSG00000186026.6	ZNF284	0.431923	0.397882
ENSG00000112079.8	STK38	0.431384	0.370552
ENSG00000159346.12	ADIPOR1	0.43084	0.343929
ENSG00000176945.16	MUC20	0.430239	0.371588
ENSG00000116747.12	TROVE2	0.429911	0.335156
ENSG00000100450.12	GZMH	0.428376	0.304066
ENSG00000213648.10	SULT1A4	0.428097	0.317472
ENSG00000104814.12	MAP4K1	0.426565	0.375446
ENSG00000172943.18	PHF8	0.425844	0.37018
ENSG00000039650.9	PNKP	0.425679	0.405329
ENSG00000198925.10	ATG9A	0.423353	0.30892
ENSG00000117155.16	SSX2IP	0.423342	0.478837
ENSG00000162929.13	KIAA1841	0.423296	0.33228
ENSG00000112182.14	BACH2	0.421642	0.429645
ENSG00000128563.13	PRKRIP1	0.421521	0.315229
ENSG00000234484.1	RP1-55C23.7	0.42145	0.662882
ENSG00000173482.16	PTPRM	0.420583	0.424794
ENSG00000189050.14	RNFT1	0.420463	0.364801
ENSG00000173153.13	ESRRA	0.420444	0.479147
ENSG00000010322.15	NISCH	0.420366	0.355543
ENSG00000080200.9	CRYBG3	0.419878	0.406995
ENSG00000090238.11	YPEL3	0.418985	0.321483
ENSG00000158109.14	TPRG1L	0.418241	0.318488
ENSG00000179406.6	LINC00174	0.417848	0.365213
ENSG00000160796.16	NBEAL2	0.417569	0.332114
ENSG00000077254.14	USP33	0.41755	0.331085
ENSG00000214655.10	ZSWIM8	0.417528	0.309406
ENSG00000264608.1	RP11-192H23.8	0.417372	0.426903
ENSG00000107021.15	TBC1D13	0.416878	0.343278
ENSG00000127947.15	PTPN12	0.415826	0.308618
ENSG00000132017.10	DCAF15	0.414707	0.331562
ENSG00000260482.3	CTD-2196E14.9	0.413849	0.391439
ENSG00000103335.19	PIEZO1	0.413767	0.324354
ENSG00000146587.17	RBAK	0.413349	0.397957
ENSG00000100804.18	PSMB5	0.412388	0.411194
ENSG00000051009.10	FAM160A2	0.41238	0.323774
ENSG00000105255.10	FSD1	0.412076	0.306343
ENSG00000274226.5	TBC1D3H	0.411871	0.30947
ENSG00000211766.1	TRBJ2-2P	0.411235	0.425017
ENSG00000104884.14	ERCC2	0.409535	0.365626
ENSG00000198089.14	SFI1	0.409268	0.325427
ENSG00000048392.11	RRM2B	0.408082	0.359136
ENSG00000136295.14	TTYH3	0.407833	0.352889
ENSG00000139055.6	ERP27	0.407496	0.443211
ENSG00000088179.8	PTPN4	0.406941	0.300007
ENSG00000279716.1	AC006128.2	0.406311	0.370881
ENSG00000172046.18	USP19	0.406181	0.305171
ENSG00000143373.17	ZNF687	0.405884	0.378249
ENSG00000270015.1	RP11-540B6.6	0.405767	0.33788
ENSG00000248323.5	LUCAT1	0.403943	0.330557
ENSG00000154889.16	MPPE1	0.40334	0.40835
ENSG00000162402.13	USP24	0.402345	0.30194
ENSG00000203485.12	INF2	0.402169	0.351834
ENSG00000213523.9	SRA1	0.400965	0.309751
ENSG00000157404.15	KIT	0.400038	0.706594
ENSG00000160584.15	SIK3	0.398822	0.410073
ENSG00000103496.14	STX4	0.398462	0.338958
ENSG00000232774.7	FLJ22447	0.397748	0.328874
ENSG00000164506.14	STXBP5	0.397607	0.411544
ENSG00000259607.1	CTD-2647L4.5	0.395897	0.32844
ENSG00000136271.10	DDX56	0.395664	0.381607
ENSG00000107796.12	ACTA2	0.395305	0.332827
ENSG00000180139.11	ACTA2-AS1	0.395201	0.428001
ENSG00000123636.17	BAZ2B	0.394482	0.39908
ENSG00000111877.17	MCM9	0.394481	0.306192
ENSG00000072778.19	ACADVL	0.393458	0.309445
ENSG00000196235.13	SUPT5H	0.391572	0.319141
ENSG00000149187.17	CELF1	0.390365	0.32648
ENSG00000100242.15	SUN2	0.390005	0.338705
ENSG00000134970.13	TMED7	0.387132	0.318272
ENSG00000204116.11	CHIC1	0.386669	0.330273
ENSG00000092098.16	RNF31	0.386151	0.327416
ENSG00000249456.1	RP11-298J20.4	0.386123	0.320378
ENSG00000185989.10	RASA3	0.385827	0.382028
ENSG00000141404.15	GNAL	0.385043	0.419298
ENSG00000114302.15	PRKAR2A	0.384206	0.502303
ENSG00000114650.18	SCAP	0.383118	0.307871
ENSG00000225450.1	RP3-508I15.14	0.382365	0.358571
ENSG00000179832.17	MROH1	0.381037	0.345488
ENSG00000065802.11	ASB1	0.380484	0.453525
ENSG00000019995.6	ZRANB1	0.380364	0.31396
ENSG00000077044.9	DGKD	0.379961	0.301788
ENSG00000003756.16	RBM5	0.379421	0.302795
ENSG00000166908.17	PIP4K2C	0.377488	0.348412
ENSG00000281371.1	INE2	0.37747	0.353231
ENSG00000032444.15	PNPLA6	0.377153	0.352393
ENSG00000103932.11	RPAP1	0.374899	0.339258
ENSG00000008128.22	CDK11A	0.373147	0.366086
ENSG00000281991.1	TMEM265	0.372603	0.425211
ENSG00000141179.13	PCTP	0.371674	0.319654
ENSG00000167930.15	FAM234A	0.3693	0.357127
ENSG00000109381.19	ELF2	0.369158	0.332631
ENSG00000198863.7	RUNDC1	0.368575	0.311158
ENSG00000103197.16	TSC2	0.36367	0.312239
ENSG00000260306.1	RP11-645C24.5	0.359239	0.464024
ENSG00000258777.1	HIF1A-AS1	0.35862	0.352009
ENSG00000151151.5	IPMK	0.355538	0.344662
ENSG00000110514.19	MADD	0.355089	0.321688
ENSG00000142687.17	KIAA0319L	0.354794	0.371254
ENSG00000143303.11	RRNAD1	0.353164	0.311053
ENSG00000054983.16	GALC	0.352599	0.404327
ENSG00000127419.16	TMEM175	0.352576	0.327178
ENSG00000244165.1	P2RY11	0.352233	0.392665
ENSG00000123124.13	WWP1	0.351403	0.302558
ENSG00000163249.9	CCNYL1	0.351165	0.433839
ENSG00000204859.11	ZBTB48	0.350537	0.402361
ENSG00000080298.15	RFX3	0.348984	0.665659
ENSG00000100038.19	TOP3B	0.34808	0.303332
ENSG00000132024.17	CC2D1A	0.347157	0.393287
ENSG00000122958.14	VPS26A	0.345544	0.316408
ENSG00000000971.15	CFH	0.345505	0.5452
ENSG00000280211.1	RP11-2C24.3	0.34445	0.403519
ENSG00000011021.21	CLCN6	0.34436	0.304137
ENSG00000107560.10	RAB11FIP2	0.344133	0.323555
ENSG00000078124.11	ACER3	0.343379	0.508381
ENSG00000116793.15	PHTF1	0.342617	0.315493
ENSG00000135823.13	STX6	0.342536	0.309286
ENSG00000143622.10	RIT1	0.34166	0.34394
ENSG00000104522.15	TSTA3	0.34137	0.320698
ENSG00000248333.8	CDK11B	0.341318	0.33963
ENSG00000138081.19	FBXO11	0.339857	0.321513
ENSG00000231686.1	RP1-203P18.1	0.339092	0.337759
ENSG00000235505.7	RP11-693N9.2	0.33857	0.350815
ENSG00000119725.17	ZNF410	0.337419	0.307244
ENSG00000260804.3	PKI55	0.336829	0.417802
ENSG00000097046.12	CDC7	0.332794	0.41849
ENSG00000131697.17	NPHP4	0.331982	0.346853
ENSG00000196961.12	AP2A1	0.331895	0.318231
ENSG00000104643.9	MTMR9	0.33106	0.363454
ENSG00000106799.12	TGFBR1	0.330807	0.513404
ENSG00000144815.14	NXPE3	0.330742	0.341165
ENSG00000136048.13	DRAM1	0.330029	0.523047
ENSG00000270871.1	AC015849.19	0.329911	0.669552
ENSG00000251022.6	THAP9-AS1	0.328049	0.36349
ENSG00000162636.15	FAM102B	0.327753	0.308989
ENSG00000275888.1	RP13-516M14.10	0.327632	0.40333
ENSG00000138757.14	G3BP2	0.327286	0.348651
ENSG00000102081.13	FMR1	0.325554	0.351118
ENSG00000177169.9	ULK1	0.323341	0.309204
ENSG00000133794.17	ARNTL	0.322256	0.383085
ENSG00000119661.14	DNAL1	0.322161	0.465543
ENSG00000100461.17	RBM23	0.320683	0.352958
ENSG00000138834.12	MAPK8IP3	0.319303	0.317093
ENSG00000149257.13	SERPINH1	0.318268	0.309901
ENSG00000105520.10	PLPPR2	0.318224	0.396895
ENSG00000204165.5	CXorf65	0.31779	0.32096
ENSG00000120889.12	TNFRSF10B	0.317266	0.379933
ENSG00000272851.1	RP11-801F7.1	0.315333	0.390852
ENSG00000188234.13	AGAP4	0.314665	0.340276
ENSG00000198689.9	SLC9A6	0.31331	0.373562
ENSG00000100916.13	BRMS1L	0.312928	0.330254
ENSG00000178498.15	DTX3	0.312877	0.326295
ENSG00000145214.13	DGKQ	0.312712	0.445966
ENSG00000124374.8	PAIP2B	0.31209	0.471069
ENSG00000240291.1	RP11-499P20.2	0.309301	0.488775
ENSG00000269981.1	RP11-34P13.16	0.309075	0.421413
ENSG00000152520.13	PAN3	0.307591	0.348381
ENSG00000044446.11	PHKA2	0.307542	0.327686
ENSG00000182109.7	RP11-69E11.4	0.306928	0.481822
ENSG00000142347.16	MYO1F	0.306693	0.443407
ENSG00000264272.1	CTD-2514K5.4	0.302807	0.390049
ENSG00000197056.9	ZMYM1	0.302388	0.313495
ENSG00000123352.17	SPATS2	0.30155	0.540634
ENSG00000183889.12	AC138969.4	0.301117	0.315946
ENSG00000233024.7	RP11-1212A22.4	0.30053	0.307219
ENSG00000268218.1	AC137932.4	0.300524	0.453367
ENSG00000147408.14	CSGALNACT1	-0.302226	-0.332034
ENSG00000241978.9	AKAP2	-0.303233	-0.598924
ENSG00000236871.7	LINC00106	-0.304028	-0.370861
ENSGR0000236871.7	LINC00106	-0.304028	-0.370861
ENSG00000156256.14	USP16	-0.30521	-0.353862
ENSG00000138459.8	SLC35A5	-0.30683	-0.3395
ENSG00000085117.11	CD82	-0.30694	-0.366724
ENSG00000206344.6	HCG27	-0.307815	-0.315038
ENSG00000273015.2	RP11-352M15.2	-0.307963	-0.304234
ENSG00000125354.22	SEPT_6	-0.309172	-0.334692
ENSG00000083099.10	LYRM2	-0.311013	-0.389446
ENSG00000166200.14	COPS2	-0.312845	-0.39933
ENSG00000089486.16	CDIP1	-0.313555	-0.30415
ENSG00000164010.13	ERMAP	-0.313618	-0.386548
ENSG00000072163.18	LIMS2	-0.314052	-0.442829
ENSG00000223865.10	HLA-DPB1	-0.315274	-0.347346
ENSG00000167740.9	CYB5D2	-0.315427	-0.327989
ENSG00000134897.13	BIVM	-0.315902	-0.30383
ENSG00000109971.13	HSPA8	-0.316172	-0.403567
ENSG00000131323.14	TRAF3	-0.317361	-0.340711
ENSG00000227946.1	AC007383.3	-0.317925	-0.379252
ENSG00000141425.17	RPRD1A	-0.318703	-0.317978
ENSG00000155265.10	GOLGA7B	-0.318796	-0.335085
ENSG00000233830.2	EIF4HP1	-0.31983	-0.302466
ENSG00000100097.11	LGALS1	-0.319966	-0.323009
ENSG00000142192.20	APP	-0.320551	-0.55417
ENSG00000129226.13	CD68	-0.321069	-0.309892
ENSG00000235314.1	LINC00957	-0.321181	-0.584851
ENSG00000155330.9	C16orf87	-0.323422	-0.514483
ENSG00000140284.10	SLC27A2	-0.324196	-0.361351
ENSG00000172936.12	MYD88	-0.324205	-0.311555
ENSG00000116171.16	SCP2	-0.326071	-0.331687
ENSG00000089692.8	LAG3	-0.326437	-0.326605
ENSG00000282851.1	BISPR	-0.328129	-0.589115
ENSG00000131089.13	ARHGEF9	-0.328462	-0.334857
ENSG00000226950.6	DANCR	-0.328481	-0.307488
ENSG00000163818.16	LZTFL1	-0.329173	-0.304568
ENSG00000272502.1	RP11-713M15.2	-0.330407	-0.496619
ENSG00000085377.13	PREP	-0.332294	-0.331517
ENSG00000063046.17	EIF4B	-0.332501	-0.332485
ENSG00000145349.16	CAMK2D	-0.332742	-0.331694
ENSG00000100299.17	ARSA	-0.333696	-0.408413
ENSG00000268509.2	RP11-572B2.1	-0.3343	-0.387752
ENSG00000102804.14	TSC22D1	-0.335526	-0.317407
ENSG00000166750.9	SLFN5	-0.337688	-0.438936
ENSG00000033170.16	FUT8	-0.338334	-0.404132
ENSG00000163154.5	TNFAIP8L2	-0.339819	-0.43268
ENSG00000196295.11	AC005154.6	-0.340251	-0.309014
ENSG00000162073.13	PAQR4	-0.340698	-0.409251
ENSG00000176912.3	TYMSOS	-0.345753	-0.420978
ENSG00000163568.13	AIM2	-0.347469	-0.478922
ENSG00000223534.1	HLA-DQB1-AS1	-0.347591	-0.302729
ENSG00000128463.12	EMC4	-0.348617	-0.306118
ENSG00000021300.13	PLEKHB1	-0.349172	-0.411326
ENSG00000154451.14	GBP5	-0.349918	-0.625457
ENSG00000266412.5	NCOA4	-0.35097	-0.41523
ENSG00000237568.1	RP4-620F22.2	-0.351069	-0.598185
ENSG00000142694.6	EVA1B	-0.351612	-0.457032
ENSG00000099194.5	SCD	-0.352076	-0.833798
ENSG00000273445.1	RP11-1399P15.1	-0.352429	-0.437778
ENSG00000162777.16	DENND2D	-0.352606	-0.476898
ENSG00000270062.1	RP11-248J18.3	-0.356065	-0.305312
ENSG00000077380.15	DYNC1I2	-0.359986	-0.322369
ENSG00000253882.6	RP11-61L23.2	-0.360383	-0.37697
ENSG00000130021.13	PUDP	-0.360688	-0.379091
ENSG00000122986.13	HVCN1	-0.360805	-0.464944
ENSG00000172216.5	CEBPB	-0.361485	-0.413574
ENSG00000101558.13	VAPA	-0.362498	-0.435603
ENSG00000081087.14	OSTM1	-0.363486	-0.338092
ENSG00000243989.7	ACY1	-0.366034	-0.306189
ENSG00000260563.3	RP13-516M14.1	-0.368139	-0.3004
ENSG00000135842.16	FAM129A	-0.368389	-0.332268
ENSG00000261801.5	LOXL1-AS1	-0.369584	-0.321396
ENSG00000135002.11	RFK	-0.37024	-0.746999
ENSG00000196735.11	HLA-DQA1	-0.371099	-0.715431
ENSG00000091409.14	ITGA6	-0.37182	-0.479898
ENSG00000216490.3	IFI30	-0.377985	-0.448359
ENSG00000171813.13	PWWP2B	-0.378328	-0.416141
ENSG00000253522.3	MIR3142HG	-0.378543	-0.758539
ENSG00000157191.19	NECAP2	-0.379939	-0.37337
ENSG00000071575.11	TRIB2	-0.380336	-0.375482
ENSG00000147443.12	DOK2	-0.380844	-0.337863
ENSG00000228784.7	LINC00954	-0.382021	-0.347264
ENSG00000185787.14	MORF4L1	-0.382631	-0.397284
ENSG00000117228.9	GBP1	-0.385931	-0.650865
ENSG00000274712.1	RP11-147L13.15	-0.386946	-0.363576
ENSG00000235437.7	LINC01278	-0.387555	-0.441142
ENSG00000113300.11	CNOT6	-0.388712	-0.429084
ENSG00000112419.14	PHACTR2	-0.390397	-0.379097
ENSG00000164048.13	ZNF589	-0.391704	-0.472134
ENSG00000117298.14	ECE1	-0.391728	-0.516912
ENSG00000133195.11	SLC39A11	-0.393317	-0.558446
ENSG00000130303.12	BST2	-0.394743	-0.547495
ENSG00000154165.4	GPR15	-0.396372	-0.376616
ENSG00000125898.12	FAM110A	-0.396636	-0.323558
ENSG00000138778.11	CENPE	-0.396966	-0.467125
ENSG00000228594.3	C1orf233	-0.397354	-0.540483
ENSG00000221944.4	TIGD1	-0.398022	-0.356007
ENSG00000135018.13	UBQLN1	-0.398154	-0.440535
ENSG00000121644.18	DESI2	-0.400437	-0.400308
ENSG00000279399.1	RP11-369J21.12	-0.403168	-0.493304
ENSG00000213965.3	NUDT19	-0.403411	-0.401175
ENSG00000126767.17	ELK1	-0.403855	-0.416849
ENSG00000143222.11	UFC1	-0.404599	-0.462751
ENSG00000198937.8	CCDC167	-0.405009	-0.340005
ENSG00000171700.13	RGS19	-0.405437	-0.46932
ENSG00000183813.6	CCR4	-0.406005	-0.524574
ENSG00000171843.15	MLLT3	-0.407507	-0.866623
ENSG00000166228.8	PCBD1	-0.407654	-0.67172
ENSG00000282889.1	AL365273.1	-0.407966	-0.517878
ENSG00000280194.1	AD000864.6	-0.408135	-0.366746
ENSG00000244480.1	AC005154.7	-0.408723	-0.391691
ENSG00000265148.5	BZRAP1-AS1	-0.413791	-0.409632
ENSG00000166401.13	SERPINB8	-0.41399	-0.329649
ENSG00000166503.8	RP11-382A20.3	-0.417037	-0.692246
ENSG00000099860.8	GADD45B	-0.4175	-0.32502
ENSG00000173706.12	HEG1	-0.418552	-0.551856
ENSG00000175582.19	RAB6A	-0.418923	-0.398574
ENSG00000122042.9	UBL3	-0.42025	-0.407921
ENSG00000169679.14	BUB1	-0.420376	-0.382076
ENSG00000185189.15	NRBP2	-0.422541	-0.384188
ENSG00000276216.1	CH17-373J23.1	-0.42266	-0.332777
ENSG00000167900.11	TK1	-0.423703	-0.531582
ENSG00000114978.17	MOB1A	-0.424977	-0.465206
ENSG00000114779.19	ABHD14B	-0.425461	-0.401641
ENSG00000125430.8	HS3ST3B1	-0.425889	-0.499117
ENSG00000260793.2	RP5-882C2.2	-0.426483	-0.54604
ENSG00000169100.13	SLC25A6	-0.42775	-0.68544
ENSGR0000169100.13	SLC25A6	-0.42775	-0.68544
ENSG00000145022.4	TCTA	-0.427765	-0.58857
ENSG00000227507.2	LTB	-0.428438	-0.647136
ENSG00000075826.16	SEC31B	-0.43059	-0.463674
ENSG00000109911.17	ELP4	-0.430791	-0.400901
ENSG00000116237.15	ICMT	-0.431123	-0.441992
ENSG00000108375.12	RNF43	-0.431657	-0.38669
ENSG00000278195.1	SSTR3	-0.432286	-0.809958
ENSG00000280077.1	RP11-87H9.4	-0.43278	-0.436068
ENSG00000104687.12	GSR	-0.43448	-0.393167
ENSG00000239264.8	TXNDC5	-0.435147	-0.584763
ENSG00000099942.12	CRKL	-0.436947	-0.326466
ENSG00000261526.2	CTB-31O20.2	-0.440561	-0.353934
ENSG00000104472.9	CHRAC1	-0.443642	-0.54257
ENSG00000280334.1	RP11-361L15.5	-0.444304	-0.4175
ENSG00000108861.8	DUSP3	-0.445471	-0.325588
ENSG00000186810.7	CXCR3	-0.445526	-0.331279
ENSG00000076248.10	UNG	-0.446432	-0.42363
ENSG00000182934.11	SRPR	-0.446945	-0.437702
ENSG00000196154.11	S100A4	-0.446958	-0.61475
ENSG00000147119.3	CHST7	-0.44731	-0.339911
ENSG00000138185.17	ENTPD1	-0.448879	-0.421855
ENSG00000028137.16	TNFRSF1B	-0.449853	-0.325366
ENSG00000078269.13	SYNJ2	-0.451193	-0.468517
ENSG00000171777.15	RASGRP4	-0.451618	-0.657787
ENSG00000168394.10	TAP1	-0.452072	-0.613445
ENSG00000184489.11	PTP4A3	-0.452421	-0.473466
ENSG00000168040.4	FADD	-0.453671	-0.448605
ENSG00000076554.15	TPD52	-0.455938	-0.410565
ENSG00000135677.10	GNS	-0.456635	-0.501143
ENSG00000277192.1	RP11-89G4.1	-0.457355	-0.467699
ENSG00000128989.10	ARPP19	-0.457653	-0.371364
ENSG00000138764.13	CCNG2	-0.458435	-0.466836
ENSG00000179818.13	PCBP1-AS1	-0.458933	-0.435011
ENSG00000084754.10	HADHA	-0.4599	-0.569731
ENSG00000182551.13	ADI1	-0.460388	-0.461298
ENSG00000071539.13	TRIP13	-0.461474	-0.463765
ENSG00000169564.6	PCBP1	-0.46188	-0.447356
ENSG00000120509.10	PDZD11	-0.463972	-0.555375
ENSG00000198252.11	STYX	-0.46399	-0.473514
ENSG00000216895.8	AC009403.2	-0.464023	-0.357597
ENSG00000184009.9	ACTG1	-0.466185	-0.373841
ENSG00000133678.13	TMEM254	-0.466387	-0.518504
ENSG00000198502.5	HLA-DRB5	-0.466854	-0.356124
ENSG00000179344.16	HLA-DQB1	-0.467115	-0.413154
ENSG00000101928.12	MOSPD1	-0.467559	-0.318632
ENSG00000147883.10	CDKN2B	-0.467756	-0.405501
ENSG00000122862.4	SRGN	-0.467779	-0.481484
ENSG00000086065.13	CHMP5	-0.468125	-0.555361
ENSG00000170876.7	TMEM43	-0.469195	-0.447766
ENSG00000186827.10	TNFRSF4	-0.474181	-0.361489
ENSG00000147454.13	SLC25A37	-0.475223	-0.40461
ENSG00000182552.14	RWDD4	-0.475952	-0.432545
ENSG00000101856.9	PGRMC1	-0.479149	-0.487908
ENSG00000161405.16	IKZF3	-0.479241	-0.324667
ENSG00000060558.3	GNA15	-0.479643	-0.337554
ENSG00000114812.12	VIPR1	-0.482363	-0.566472
ENSG00000170632.13	ARMC10	-0.483479	-0.602145
ENSG00000185262.8	UBALD2	-0.483776	-0.303842
ENSG00000165527.6	ARF6	-0.484608	-0.374638
ENSG00000154429.10	CCSAP	-0.486424	-0.346322
ENSG00000232533.1	AC093673.5	-0.489783	-0.441009
ENSG00000255221.2	CARD17	-0.4909	-0.715218
ENSG00000168214.20	RBPJ	-0.491847	-0.342439
ENSG00000170017.12	ALCAM	-0.491907	-0.336147
ENSG00000174171.5	RP11-23P13.6	-0.492182	-0.356892
ENSG00000084234.16	APLP2	-0.495349	-0.361006
ENSG00000128342.4	LIF	-0.49598	-0.785193
ENSG00000227081.5	RP11-543P15.1	-0.496372	-0.904972
ENSG00000231682.1	AC097713.4	-0.497507	-0.493955
ENSG00000272341.1	RP1-151F17.2	-0.497613	-0.408575
ENSG00000254721.1	RP11-805J14.5	-0.498429	-0.444368
ENSG00000229931.1	RP1-151F17.1	-0.498754	-0.608142
ENSG00000086598.10	TMED2	-0.50224	-0.636391
ENSG00000129055.12	ANAPC13	-0.502248	-0.370977
ENSG00000173113.6	TRMT112	-0.504295	-0.559899
ENSG00000165355.7	FBXO33	-0.505057	-0.462406
ENSG00000164649.19	CDCA7L	-0.510387	-0.726464
ENSG00000137720.7	C11orf1	-0.511342	-0.406886
ENSG00000172725.13	CORO1B	-0.511953	-0.622735
ENSG00000258555.5	SPECC1L-ADORA2A	-0.513781	-0.467669
ENSG00000185201.16	IFITM2	-0.514446	-0.543701
ENSG00000196839.12	ADA	-0.517126	-0.334266
ENSG00000203668.1	CHML	-0.517875	-0.709024
ENSG00000236439.4	RP11-175B9.3	-0.518095	-0.963852
ENSG00000140262.17	TCF12	-0.518339	-0.4797
ENSG00000263394.1	RP11-160E2.19	-0.519103	-0.332012
ENSG00000115170.13	ACVR1	-0.520914	-0.502584
ENSG00000244270.1	RPL32P29	-0.527231	-0.564284
ENSG00000170571.11	EMB	-0.529733	-0.460923
ENSG00000138758.11	SEPT_6	-0.53056	-0.373784
ENSG00000140740.10	UQCRC2	-0.531036	-0.544677
ENSG00000280128.1	XXbac-BPG283O16.9	-0.533345	-0.302338
ENSG00000170275.14	CRTAP	-0.533684	-0.554643
ENSG00000173409.13	ARV1	-0.533898	-0.694972
ENSG00000128271.20	ADORA2A	-0.534897	-0.505405
ENSG00000204287.13	HLA-DRA	-0.541318	-0.574018
ENSG00000077782.19	FGFR1	-0.547593	-1.08975
ENSG00000231721.6	LINC-PINT	-0.54954	-0.456531
ENSG00000087502.17	ERGIC2	-0.55101	-0.544708
ENSG00000144895.11	EIF2A	-0.55145	-0.555873
ENSG00000130590.13	SAMD10	-0.552579	-0.552714
ENSG00000140941.12	MAP1LC3B	-0.55285	-0.448851
ENSG00000134460.15	IL2RA	-0.55395	-0.632206
ENSG00000245164.6	LINC00861	-0.553963	-0.55733
ENSG00000172543.7	CTSW	-0.55406	-0.400158
ENSG00000123091.4	RNF11	-0.567997	-0.569055
ENSG00000065989.15	PDE4A	-0.569017	-0.402335
ENSG00000160179.18	ABCG1	-0.573506	-0.9369
ENSG00000139278.9	GLIPR1	-0.578446	-0.465171
ENSG00000112782.15	CLIC5	-0.581451	-0.487919
ENSG00000268471.4	DKFZP434I0714	-0.582175	-0.534824
ENSG00000229664.1	RP11-536K7.5	-0.584713	-0.493537
ENSG00000233093.5	LINC00892	-0.584735	-0.625086
ENSG00000183153.6	GJD3	-0.585434	-0.530396
ENSG00000254750.1	CASP1P2	-0.58557	-0.394425
ENSG00000106682.14	EIF4H	-0.586512	-0.618386
ENSG00000123427.15	METTL21B	-0.586991	-0.330768
ENSG00000134109.10	EDEM1	-0.589286	-0.438317
ENSG00000197006.13	METTL9	-0.5905	-0.683884
ENSG00000175567.8	UCP2	-0.592079	-0.531954
ENSG00000107281.9	NPDC1	-0.592629	-0.50488
ENSG00000163297.16	ANTXR2	-0.59649	-0.393932
ENSG00000271856.1	LINC01215	-0.598444	-0.792726
ENSG00000250312.6	ZNF718	-0.601921	-0.342255
ENSG00000196693.14	ZNF33B	-0.602178	-0.611525
ENSG00000276043.4	UHRF1	-0.603167	-0.507182
ENSG00000075785.12	RAB7A	-0.603328	-0.613269
ENSG00000261094.2	RP11-355O1.11	-0.606506	-0.398276
ENSG00000228716.6	DHFR	-0.613508	-0.663479
ENSG00000188021.8	UBQLN2	-0.615615	-0.489094
ENSG00000126860.11	EVI2A	-0.619268	-0.597128
ENSG00000069399.12	BCL3	-0.619718	-0.526505
ENSG00000224950.2	RP5-1086K13.1	-0.622373	-0.447334
ENSG00000172824.14	CES4A	-0.623668	-0.605839
ENSG00000075426.11	FOSL2	-0.625611	-0.312431
ENSG00000196123.12	KIAA0895L	-0.626344	-0.472094
ENSG00000116649.9	SRM	-0.627634	-0.727632
ENSG00000204161.13	C10orf128	-0.632481	-0.369783
ENSG00000275180.1	RP11-631N16.4	-0.633476	-0.477916
ENSG00000143507.17	DUSP10	-0.638524	-0.394936
ENSG00000147889.16	CDKN2A	-0.64184	-0.389871
ENSG00000082074.15	FYB	-0.649591	-0.451979
ENSG00000177954.11	RPS27	-0.65048	-0.911487
ENSG00000177494.5	ZBED2	-0.654652	-0.601763
ENSG00000173218.14	VANGL1	-0.654917	-0.793767
ENSG00000119950.20	MXI1	-0.657824	-0.467236
ENSG00000130164.11	LDLR	-0.662105	-0.599878
ENSG00000257453.1	RP11-290L1.3	-0.665084	-0.754793
ENSG00000270557.1	RP11-546J1.1	-0.666791	-0.385027
ENSG00000129521.13	EGLN3	-0.668691	-0.511689
ENSG00000131171.12	SH3BGRL	-0.673189	-0.661173
ENSG00000125735.10	TNFSF14	-0.674626	-0.350537
ENSG00000239713.7	APOBEC3G	-0.676509	-0.431246
ENSG00000049768.14	FOXP3	-0.677535	-0.668853
ENSG00000089050.14	RBBP9	-0.680247	-0.546347
ENSG00000115415.18	STAT1	-0.682618	-0.934264
ENSG00000090339.8	ICAM1	-0.683375	-0.705863
ENSG00000188985.6	DHFRP1	-0.68869	-0.588248
ENSG00000164120.13	HPGD	-0.695652	-0.348875
ENSG00000151690.14	MFSD6	-0.697508	-0.599756
ENSG00000177868.11	SVBP	-0.698112	-0.71188
ENSG00000145391.13	SETD7	-0.700608	-0.617757
ENSG00000147955.16	SIGMAR1	-0.705629	-0.816339
ENSG00000100298.15	APOBEC3H	-0.717575	-0.402375
ENSG00000276116.2	FUT8-AS1	-0.723042	-0.599219
ENSG00000211899.8	IGHM	-0.733364	-0.78903
ENSG00000178038.16	ALS2CL	-0.740506	-0.848987
ENSG00000184743.12	ATL3	-0.758066	-0.517951
ENSG00000164032.11	H2AFZ	-0.760223	-0.867908
ENSG00000273373.1	RP5-1074L1.4	-0.761073	-0.455082
ENSG00000113328.18	CCNG1	-0.762125	-0.585104
ENSG00000170035.15	UBE2E3	-0.76527	-0.440658
ENSG00000184557.4	SOCS3	-0.766629	-0.433036
ENSG00000214114.8	MYCBP	-0.783016	-0.699323
ENSG00000270189.1	RP11-258C19.7	-0.786781	-0.473474
ENSG00000160789.19	LMNA	-0.78737	-0.528247
ENSG00000139289.13	PHLDA1	-0.809275	-0.889135
ENSG00000145649.7	GZMA	-0.821733	-0.457227
ENSG00000092964.16	DPYSL2	-0.823541	-0.61781
ENSG00000266208.1	CTD-2267D19.3	-0.826296	-0.805535
ENSG00000277511.1	CTD-2095E4.5	-0.827112	-0.906406
ENSG00000029534.19	ANK1	-0.84264	-0.676668
ENSG00000198911.11	SREBF2	-0.860665	-0.904459
ENSG00000138678.10	GPAT3	-0.865699	-0.851751
ENSG00000279108.1	CTC-490E21.11	-0.870525	-0.609139
ENSG00000056972.18	TRAF3IP2	-0.883313	-0.632532
ENSG00000146674.14	IGFBP3	-0.903314	-0.639846
ENSG00000245532.5	NEAT1	-0.912233	-0.837176
ENSG00000121807.5	CCR2	-0.922141	-0.519105
ENSG00000196126.10	HLA-DRB1	-0.930593	-0.785684
ENSG00000170476.15	MZB1	-0.954517	-1.22571
ENSG00000170522.9	ELOVL6	-0.97908	-0.980853
ENSG00000183134.4	PTGDR2	-1.04901	-1.15186
ENSG00000261061.1	RP11-303E16.2	-1.07617	-1.09345
ENSG00000232810.3	TNF	-1.0982	-0.38567
ENSG00000238268.2	RP11-229P13.19	-1.11152	-0.875959
ENSG00000171246.5	NPTX1	-1.1218	-0.618989
ENSG00000185340.15	GAS2L1	-1.12391	-0.327146
ENSG00000107317.11	PTGDS	-1.12885	-0.776498
ENSG00000077984.5	CST7	-1.18708	-0.505398
ENSG00000069869.15	NEDD4	-1.19769	-0.686696
ENSG00000266088.5	RP5-1028K7.2	-1.22444	-1.19774
ENSG00000135318.11	NT5E	-1.26986	-1.15762
ENSG00000274021.1	RP11-823E8.3	-1.30696	-0.49369
ENSG00000120738.7	EGR1	-1.35062	-0.96944
ENSG00000139318.7	DUSP6	-1.39009	-0.612241
ENSG00000198563.13	DDX39B	-1.45119	-1.3145
