# Supplementary material for: The RNA helicase DDX39B activates FOXP3 RNA splicing to control T regulatory cell fate
Source: eLife. 2023 Jun 1;12:e76927. doi: 10.7554/eLife.76927 (PMC10234631; doi:10.7554/eLife.76927)
Supplement: Supplementary file 3. — Related to Figure 1 and Figure 1—figure supplements 2 and 3. [file elife-76927-supp3.xlsx]

## Sheet: Sheet1
Supplementary file 3. List of MS Susceptibility SNPs and genes analyzed. Related to Figures 1 and Figure 1-figure supplements 2 and 3.
SNPs	Alternative name	MS_Susceptible_Gene	A1	A2	OR_A1†	RiskAllele	eQTL_A1	eQTL_A2	NES_eQTL_A1§	HighExpressionAllele	Classification
chr1:154983036	rs112344141	ADAM15	T	G	0.8448	G	T	G	0.14	G	Pathogenic
chr1:154983036	rs112344141	SHC1	T	G	0.8448	G	T	G	0.33	G	Pathogenic
chr3:121783015	rs75937181	IQCB1	T	G	1.1199	T	T	G	-0.15	T	Pathogenic
chr6:119215402	rs11542663	CEP85L	A	C	1.0776	A	A	C	-0.07	A	Pathogenic
chr6:119215402	rs11542663	FAM184A	A	C	1.0776	A	A	C	-0.011	A	Pathogenic
chr7:50328339	rs116877451	IKZF1	A	G	1.0912	A	A	G	-0.36	A	Pathogenic
chr8:95851818	rs78727559	INTS8	T	G	0.8674	G	T	G	0.069	G	Pathogenic
chr8:95851818	rs78727559	TP53INP1	T	G	0.8674	G	T	G	0.12	G	Pathogenic
rs10063294		IL7R	A	G	0.8874	G	G	A	-0.18	G	Pathogenic
rs1014486		IL12A	C	T	1.11	C	T	C	0.028	C	Pathogenic
rs10191360		CXCR4	T	C	1.0836	T	T	C	-0.097	T	Pathogenic
rs10245867		JAZF1	G	T	0.9349	T	G	T	0.042	T	Pathogenic
rs1026916		MLX	G	A	0.8976	A	A	G	-0.043	A	Pathogenic
rs1026916		RAB5C	G	A	0.8976	A	A	G	-0.072	A	Pathogenic
rs1026916		STAT5A	G	A	0.8976	A	A	G	-0.086	A	Pathogenic
rs10271373		ZC3HAV1	C	A	0.9459	A	A	C	-0.15	A	Pathogenic
rs10271373		ZC3HAV1L	C	A	0.9459	A	A	C	-0.09	A	Pathogenic
rs1076928		PXT1	C	T	0.885	T	T	C	-0.15	T	Pathogenic
rs1087056		ZNF438	G	A	0.9193	A	G	A	0.25	A	Pathogenic
rs10936602		LRRC31	T	C	1.0766	T	T	C	-0.15	T	Pathogenic
rs10951042		CHST12	C	T	1.1021	C	T	C	0.14	C	Pathogenic
rs10951154		HOXA1	T	C	0.926	C	C	T	-0.3	C	Pathogenic
rs10951154		HOXA4	T	C	0.926	C	C	T	-0.19	C	Pathogenic
rs10951154		SKAP2	T	C	0.926	C	C	T	-0.13	C	Pathogenic
rs11079784		ITGB3	C	T	1.1074	C	T	C	0.0066	C	Pathogenic
rs11079784		NPEPPS	C	T	1.1074	C	T	C	0.14	C	Pathogenic
rs11079784		TBKBP1	C	T	1.1074	C	T	C	0.44	C	Pathogenic
rs11083862		NPAS1	A	T	1.0769	A	A	T	-0.1	A	Pathogenic
rs11083862		ZC3H4	A	T	1.0769	A	A	T	-0.08	A	Pathogenic
rs11125803		NCOA1	T	C	0.9338	C	C	T	-0.075	C	Pathogenic
rs1112718		IDE	A	G	1.086	A	A	G	-0.038	A	Pathogenic
rs11161550		BCL10	A	G	0.9425	G	G	A	-0.095	G	Pathogenic
rs11161550		DDAH1	A	G	0.9425	G	G	A	-0.19	G	Pathogenic
rs11231749		CCDC88B	C	T	1.0681	C	T	C	0.014	C	Pathogenic
rs11231749		FLRT1	C	T	1.0681	C	T	C	0.1	C	Pathogenic
rs11231749		PLCB3	C	T	1.0681	C	T	C	0.059	C	Pathogenic
rs11231749		RPS6KA4	C	T	1.0681	C	T	C	0.015	C	Pathogenic
rs11256593		IL15RA	T	C	1.2062	T	C	T	0.013	T	Pathogenic
rs11749040		DAB2	G	A	0.8699	A	G	A	0.072	A	Pathogenic
rs11749040		PTGER4	G	A	0.8699	A	G	A	0.16	A	Pathogenic
rs1177228		C2orf74	G	A	1.0953	G	A	G	0.43	G	Pathogenic
rs1177228		PUS10	G	A	1.0953	G	A	G	0.16	G	Pathogenic
rs1177228		REL	G	A	1.0953	G	A	G	0.00066	G	Pathogenic
rs1177228		USP34	G	A	1.0953	G	A	G	0.038	G	Pathogenic
rs11809700		FAM69A	C	T	0.8849	T	C	T	0.022	T	Pathogenic
rs11809700		GFI1	C	T	0.8849	T	C	T	0.095	T	Pathogenic
rs11919880		CCR4	A	G	1.0603	A	A	G	-0.071	A	Pathogenic
rs11919880		GLB1	A	G	1.0603	A	A	G	-0.062	A	Pathogenic
rs12133753		EVI5	C	T	1.131	C	C	T	-0.025	C	Pathogenic
rs12133753		FAM69A	C	T	1.131	C	C	T	-0.079	C	Pathogenic
rs12133753		TGFBR3	C	T	1.131	C	C	T	-0.11	C	Pathogenic
rs12365699		CXCR5	G	A	1.1237	G	G	A	-0.051	G	Pathogenic
rs12365699		DDX6	G	A	1.2659	G	G	A	-0.1	G	Pathogenic
rs12365699		TMEM25	G	A	1.1237	G	G	A	-0.061	G	Pathogenic
rs1250551		ZMIZ1	G	T	0.9083	T	G	T	0.11	T	Pathogenic
rs12609500		ILF3	C	T	1.0581	C	C	T	-0.047	C	Pathogenic
rs12609500		LDLR	C	T	1.0581	C	C	T	-0.058	C	Pathogenic
rs12614091		CD28	A	T	1.076	A	A	T	-0.27	A	Pathogenic
rs12622670		FBXO48	T	C	1.0901	T	C	T	0.06	T	Pathogenic
rs12722559		IL15RA	C	A	1.1372	C	C	A	-0.083	C	Pathogenic
rs12971909		CTB-50L17.10	G	A	0.9324	A	G	A	0.07	A	Pathogenic
rs12971909		PLIN4	G	A	0.9324	A	G	A	0.11	A	Pathogenic
rs12971909		SH3GL1	G	A	0.9324	A	G	A	0.093	A	Pathogenic
rs13136820		RHOH	C	T	1.0775	C	C	T	-0.095	C	Pathogenic
rs1323292		RGS1	A	G	1.1625	A	G	A	0.053	A	Pathogenic
rs13327021		CMC1	C	T	0.9232	T	C	T	0.16	T	Pathogenic
rs13327021		EOMES	C	T	0.9232	T	C	T	0.00023	T	Pathogenic
rs13385171		SPRED2	C	T	1.0679	C	T	C	0.12	C	Pathogenic
rs1365120		PRR5L	T	C	0.9126	C	C	T	-0.11	C	Pathogenic
rs1399180		GATA3	T	C	0.9078	C	T	C	0.12	C	Pathogenic
rs140522		NCAPH2	C	T	0.8962	T	T	C	-0.091	T	Pathogenic
rs140522		SCO2	C	T	0.8962	T	T	C	-0.36	T	Pathogenic
rs1415069		EVI5	C	G	0.931	G	G	C	-0.015	G	Pathogenic
rs1465697		SLC6A16	C	T	0.9113	T	C	T	0.17	T	Pathogenic
rs17051321		TNIP3	C	T	0.9222	T	C	T	0.068	T	Pathogenic
rs1738074		RSPH3	T	C	0.8828	C	T	C	0.069	C	Pathogenic
rs1738074		TAGAP	T	C	0.8828	C	T	C	0.12	C	Pathogenic
rs17724508		WWOX	T	C	1.1431	T	T	C	-0.14	T	Pathogenic
rs17741873		CFAP70	G	T	1.0676	G	G	T	-0.14	G	Pathogenic
rs17741873		ECD	G	T	1.0676	G	G	T	-0.077	G	Pathogenic
rs17741873		NDST2	G	T	1.0676	G	G	T	-0.067	G	Pathogenic
rs17741873		SEC24C	G	T	1.0676	G	G	T	-0.15	G	Pathogenic
rs17741873		ZSWIM8	G	T	1.0676	G	G	T	-0.13	G	Pathogenic
rs17780048		TNFAIP3	C	T	1.1008	C	C	T	-0.074	C	Pathogenic
rs1800693		TNFRSF1A	T	C	0.87	C	T	C	0.19	C	Pathogenic
rs1801133		CLCN6	A	G	0.9033	G	G	A	-0.24	G	Pathogenic
rs1801133		MTHFR	A	G	0.9033	G	G	A	-0.36	G	Pathogenic
rs2084007		CATSPER3	C	T	1.0835	C	C	T	-0.049	C	Pathogenic
rs2084007		JADE2	C	T	1.0835	C	C	T	-0.44	C	Pathogenic
rs2084007		TCF7	C	T	1.0835	C	C	T	-0.061	C	Pathogenic
rs2150879		BCAS3	G	A	1.1163	G	G	A	-0.12	G	Pathogenic
rs2150879		HEATR6	G	A	1.1163	G	G	A	-0.17	G	Pathogenic
rs2269434		DDB2	T	C	0.9169	C	T	C	0.15	C	Pathogenic
rs2269434		FNBP4	T	C	0.9169	C	T	C	0.012	C	Pathogenic
rs2269434		LRP4	T	C	0.9169	C	T	C	0.0051	C	Pathogenic
rs2269434		RAPSN	T	C	0.9169	C	T	C	0.039	C	Pathogenic
rs2317231		FCRL1	G	T	1.0804	G	G	T	-0.2	G	Pathogenic
rs2317231		FCRL4	G	T	1.0804	G	G	T	-0.011	G	Pathogenic
rs2317231		FCRL5	G	T	1.0804	G	G	T	-0.045	G	Pathogenic
rs2327586		HBS1L	T	C	1.1053	T	C	T	0.14	T	Pathogenic
rs2331964		EAF2	C	T	1.0948	C	T	C	0.49	C	Pathogenic
rs2331964		FBXO40	C	T	1.0948	C	T	C	0.3	C	Pathogenic
rs2331964		GOLGB1	C	T	1.0948	C	T	C	0.091	C	Pathogenic
rs2331964		ILDR1	C	T	1.0948	C	T	C	0.24	C	Pathogenic
rs2331964		IQCB1	C	T	1.0948	C	T	C	0.71	C	Pathogenic
rs2331964		SLC15A2	C	T	1.0948	C	T	C	0.29	C	Pathogenic
rs244656		CDKN2AIPNL	A	T	1.1116	A	T	A	0.049	A	Pathogenic
rs244656		TCF7	A	T	1.1116	A	T	A	0.22	A	Pathogenic
rs249677		NDFIP1	C	A	0.9313	A	C	A	0.35	A	Pathogenic
rs2546890		IL12B	A	G	1.0878	A	A	G	-0.1	A	Pathogenic
rs2590438		BCL6	T	G	0.9357	G	T	G	0.059	G	Pathogenic
rs2590438		LPP	T	G	0.9357	G	T	G	0.049	G	Pathogenic
rs2705616		PTPN13	G	C	0.9283	C	C	G	-0.11	C	Pathogenic
rs2726479		PPA2	T	C	0.9368	C	T	C	0.049	C	Pathogenic
rs2726479		TET2	T	C	0.9368	C	T	C	0.043	C	Pathogenic
rs28834106		KRI1	T	C	1.1171	T	T	C	-0.054	T	Pathogenic
rs28834106		TYK2	T	C	1.1171	T	T	C	-0.0071	T	Pathogenic
rs2986736		HES2	T	C	0.8928	C	T	C	0.00034	C	Pathogenic
rs3184504		ALDH2	T	C	1.0643	T	T	C	-0.045	T	Pathogenic
rs3184504		ATXN2	T	C	1.0643	T	T	C	-0.026	T	Pathogenic
rs3184504		CUX2	T	C	1.0643	T	T	C	-0.063	T	Pathogenic
rs3184504		SH2B3	T	C	1.0643	T	T	C	-0.13	T	Pathogenic
rs3184504		TMEM116	T	C	1.0643	T	T	C	-0.11	T	Pathogenic
rs32658		HSD17B4	G	T	0.9406	T	G	T	0.1	T	Pathogenic
rs32658		TNFAIP8	G	T	0.9406	T	G	T	0.36	T	Pathogenic
rs34536443		ICAM3	G	C	1.204	G	G	C	-0.14	G	Pathogenic
rs34536443		SMARCA4	G	C	1.204	G	G	C	-0.097	G	Pathogenic
rs34947566		CLEC16A	C	A	1.1463	C	C	A	-0.014	C	Pathogenic
rs34947566		PRM2	C	A	1.1463	C	C	A	-0.063	C	Pathogenic
rs34947566		RMI2	C	A	1.1463	C	C	A	-0.25	C	Pathogenic
rs354033		ZNF746	G	A	1.0813	G	G	A	-0.15	G	Pathogenic
rs354033		ZNF777	G	A	1.0813	G	G	A	-0.24	G	Pathogenic
rs3737798		CASQ1	A	G	1.0741	A	A	G	-0.06	A	Pathogenic
rs3737798		COPA	A	G	1.0741	A	A	G	-0.046	A	Pathogenic
rs3737798		VANGL2	A	G	1.0741	A	A	G	-0.067	A	Pathogenic
rs3809627		TBX6	A	C	0.9138	C	C	A	-0.39	C	Pathogenic
rs3809627		YPEL3	A	C	0.9138	C	C	A	-0.12	C	Pathogenic
rs3923387		GRINA	T	C	1.0639	T	C	T	0.0055	T	Pathogenic
rs3923387		SPATC1	T	C	1.0639	T	C	T	0.062	T	Pathogenic
rs4262739		ETS1	A	G	0.9366	G	G	A	-0.077	G	Pathogenic
rs4409785		FAM76B	T	C	0.9196	C	T	C	0.12	C	Pathogenic
rs4409785		SESN3	T	C	0.9196	C	T	C	0.038	C	Pathogenic
rs4728142		IRF5	G	A	0.9449	A	G	A	0.23	A	Pathogenic
rs4796224		DHRS11	A	G	0.9161	G	G	A	-0.39	G	Pathogenic
rs4796224		MRM1	A	G	0.9161	G	G	A	-0.06	G	Pathogenic
rs4796224		MYO19	A	G	0.9161	G	G	A	-0.17	G	Pathogenic
rs4796224		PIGW	A	G	0.9161	G	G	A	-0.034	G	Pathogenic
rs4808760		IL12RB1	G	C	0.893	C	C	G	-0.27	C	Pathogenic
rs4808760		MAST3	G	C	0.893	C	C	G	-0.059	C	Pathogenic
rs4808760		PDE4C	G	C	0.893	C	C	G	-0.29	C	Pathogenic
rs483180		PHGDH	G	C	0.9209	C	C	G	-0.074	C	Pathogenic
rs4939490		CD5	G	C	1.1237	G	C	G	0.12	G	Pathogenic
rs4939490		CD6	G	C	1.1237	G	C	G	0.16	G	Pathogenic
rs4940730		ALPK2	A	G	1.0626	A	A	G	-0.19	A	Pathogenic
rs4940730		MALT1	A	G	1.0626	A	A	G	-0.24	A	Pathogenic
rs531612		BANF1	C	T	0.9355	T	C	T	0.057	T	Pathogenic
rs531612		C11orf68	C	T	0.9355	T	C	T	0.017	T	Pathogenic
rs531612		CCDC85B	C	T	0.9355	T	C	T	0.0026	T	Pathogenic
rs531612		CFL1	C	T	0.9355	T	C	T	0.036	T	Pathogenic
rs531612		CST6	C	T	0.9355	T	C	T	0.045	T	Pathogenic
rs531612		CTSW	C	T	0.9355	T	C	T	0.16	T	Pathogenic
rs531612		EHBP1L1	C	T	0.9355	T	C	T	0.021	T	Pathogenic
rs531612		MAP3K11	C	T	0.9355	T	C	T	0.15	T	Pathogenic
rs531612		MUS81	C	T	0.9355	T	C	T	0.12	T	Pathogenic
rs531612		SART1	C	T	0.9355	T	C	T	0.079	T	Pathogenic
rs531612		SF3B2	C	T	0.9355	T	C	T	0.055	T	Pathogenic
rs531612		SIPA1	C	T	0.9355	T	C	T	0.052	T	Pathogenic
rs56095240		FAM76B	T	A	0.9024	A	T	A	0.024	A	Pathogenic
rs57116599		ANAPC1	A	G	0.9137	G	G	A	-0.048	G	Pathogenic
rs57116599		MERTK	A	G	0.9137	G	G	A	-0.14	G	Pathogenic
rs57116599		MERTK	A	G	0.9137	G	G	A	-0.14	G	Pathogenic
rs58166386		C19orf44	G	A	1.108	G	A	G	0.08	G	Pathogenic
rs58166386		CALR3	G	A	1.108	G	A	G	0.084	G	Pathogenic
rs58166386		EPS15L1	G	A	1.108	G	A	G	0.014	G	Pathogenic
rs58166386		SLC35E1	G	A	1.108	G	A	G	0.056	G	Pathogenic
rs59655222		KIF21B	T	C	1.1049	T	T	C	-0.017	T	Pathogenic
rs6020055		PTPN1	A	G	1.0591	A	A	G	-0.14	A	Pathogenic
rs6020055		SLC9A8	A	G	1.0591	A	A	G	-0.11	A	Pathogenic
rs6072343		PLCG1	G	A	0.9246	A	G	A	0.2	A	Pathogenic
rs61884005		CYP2R1	A	G	0.7772	G	C	G	0.12	G	Pathogenic
rs61884005		RRAS2	A	G	0.7772	G	C	G	0.087	G	Pathogenic
rs62013236		CTSH	C	T	1.106	C	C	T	-0.51	C	Pathogenic
rs62420820		IL22RA2	A	G	1.1444	A	G	A	0.052	A	Pathogenic
rs6427540		CD48	C	T	1.106	C	C	T	-0.017	C	Pathogenic
rs6496663		CRTC3	A	C	0.9177	C	A	C	0.11	C	Pathogenic
rs6496663		IQGAP1	A	C	0.9177	C	A	C	0.086	C	Pathogenic
rs6496663		ZNF774	A	C	0.9177	C	A	C	0.18	C	Pathogenic
rs6533052		MANBA	A	G	1.0927	A	G	A	0.095	A	Pathogenic
rs6533052		SLC9B2	A	G	1.0927	A	G	A	0.069	A	Pathogenic
rs6589706		BCL9L	A	G	1.11	A	A	G	-0.016	A	Pathogenic
rs6589706		DDX6	A	G	1.11	A	A	G	-0.055	A	Pathogenic
rs6589706		TMEM25	A	G	1.11	A	A	G	-0.097	A	Pathogenic
rs6589939		UBASH3B	A	G	0.9235	G	A	G	0.11	G	Pathogenic
rs67111717		LMAN2	G	A	1.1041	G	A	G	0.008	G	Pathogenic
rs67111717		MXD3	G	A	1.1041	G	A	G	0.073	G	Pathogenic
rs67111717		NSD1	G	A	1.1041	G	A	G	0.11	G	Pathogenic
rs67111717		RGS14	G	A	1.1041	G	A	G	0.18	G	Pathogenic
rs67111717		SLC34A1	G	A	1.1041	G	A	G	0.1	G	Pathogenic
rs6742		LIME1	C	T	1.1492	C	T	C	0.084	C	Pathogenic
rs6742		RTEL1	C	T	1.1492	C	T	C	0.098	C	Pathogenic
rs6742		TNFRSF6B	C	T	1.1492	C	T	C	0.056	C	Pathogenic
rs6789653		ZBTB38	G	A	1.0595	G	G	A	-0.032	G	Pathogenic
rs6837324		TEC	A	G	0.9376	G	A	G	0.053	G	Pathogenic
rs6911131		FUCA2	A	G	0.8919	G	A	G	0.45	G	Pathogenic
rs6990534		LINC00977	A	G	0.9074	G	A	G	0.026	G	Pathogenic
rs6990534		PVT1	A	G	0.9074	G	A	G	0.0021	G	Pathogenic
rs701006		CYP27B1	G	A	1.124	G	A	G	0.03	G	Pathogenic
rs701006		OS9	G	A	1.124	G	A	G	0.15	G	Pathogenic
rs701006		PIP4K2C	G	A	1.124	G	A	G	0.12	G	Pathogenic
rs701006		TSFM	G	A	1.124	G	A	G	0.22	G	Pathogenic
rs701006		TSPAN31	G	A	1.124	G	A	G	0.063	G	Pathogenic
rs7222450		MAP3K14	A	G	1.0617	A	G	A	0.19	A	Pathogenic
rs7260482		PVR	A	C	0.9278	C	A	C	0.096	C	Pathogenic
rs72922276		AK4	G	A	1.1642	G	G	A	-0.2	G	Pathogenic
rs72922276		JAK1	G	A	1.1642	G	G	A	-0.16	G	Pathogenic
rs72922276		RAVER2	G	A	1.1642	G	G	A	-0.11	G	Pathogenic
rs72989863		MARCH1	G	A	1.066	G	G	A	-0.04	G	Pathogenic
rs735542		LINC00977	A	G	1.0728	A	G	A	0.12	A	Pathogenic
rs735542		POU5F1B	A	G	1.0728	A	G	A	0.093	A	Pathogenic
rs7620803		CD200R1	T	G	1.3609	T	C	T	0.11	T	Pathogenic
rs7731626		IL6ST	G	A	1.0944	G	G	A	-0.0089	G	Pathogenic
rs7855251		NANS	T	C	1.0774	T	T	C	-0.04	T	Pathogenic
rs7855251		TRIM14	T	C	1.0774	T	T	C	-0.15	T	Pathogenic
rs7975763		C12orf65	C	T	0.9214	T	C	T	0.17	T	Pathogenic
rs7975763		OGFOD2	C	T	0.9214	T	C	T	0.31	T	Pathogenic
rs7975763		PITPNM2	C	T	0.9214	T	C	T	0.14	T	Pathogenic
rs7977720		CLEC2D	C	T	0.9095	T	C	T	0.012	T	Pathogenic
rs7977720		CLECL1	C	T	0.9095	T	C	T	0.38	T	Pathogenic
rs8062446		NLRC5	T	C	1.0878	T	C	T	0.045	T	Pathogenic
rs883871		GSDMB	G	A	0.8865	A	G	A	0.055	A	Pathogenic
rs883871		NR1D1	G	A	0.8865	A	G	A	0.058	A	Pathogenic
rs9308424		FLVCR1	A	G	0.9136	G	G	A	-0.16	G	Pathogenic
rs9308424		TATDN3	A	G	0.9136	G	G	A	-0.039	G	Pathogenic
rs9308424		UBE2D3	A	G	0.9136	G	G	A	-0.0057	G	Pathogenic
rs9591325		ST13P4	T	C	1.2276	T	T	C	-0.23	T	Pathogenic
rs962052		RND3	C	T	1.0628	C	C	T	-0.061	C	Pathogenic
rs9808753		IFNGR2	G	A	1.082	G	A	G	0.19	G	Pathogenic
rs9808753		IL10RB	G	A	1.082	G	A	G	0.087	G	Pathogenic
rs9808753		ITSN1	G	A	1.082	G	A	G	0.097	G	Pathogenic
rs9808753		SON	G	A	1.082	G	A	G	0.013	G	Pathogenic
rs983494		SLAMF7	G	A	1.0875	G	G	A	-0.35	G	Pathogenic
rs9843355		ARHGAP31	G	A	1.1525	G	G	A	-0.16	G	Pathogenic
rs9843355		CD80	G	A	1.1525	G	G	A	-0.031	G	Pathogenic
rs9843355		POGLUT1	G	A	1.1525	G	G	A	-0.35	G	Pathogenic
rs9863496		KCNH8	T	C	0.9298	C	T	C	0.13	C	Pathogenic
rs9863496		SATB1	T	C	0.9298	C	T	C	0.1	C	Pathogenic
rs9900529		GGA3	C	G	1.0648	C	C	G	-0.076	C	Pathogenic
rs9900529		GRB2	C	G	1.0648	C	C	G	-0.035	C	Pathogenic
rs9900529		MIF4GD	C	G	1.0648	C	C	G	-0.044	C	Pathogenic
rs9900529		MYO15B	C	G	1.0648	C	C	G	-0.052	C	Pathogenic
rs9900529		NT5C	C	G	1.0648	C	C	G	-0.13	C	Pathogenic
rs9900529		NUP85	C	G	1.0648	C	C	G	-0.092	C	Pathogenic
rs9909593		CSF3	A	G	0.9249	G	A	G	0.0054	G	Pathogenic
rs9909593		ERBB2	A	G	0.9249	G	A	G	0.062	G	Pathogenic
rs9909593		IKZF3	A	G	0.9249	G	A	G	0.37	G	Pathogenic
rs9909593		MED24	A	G	0.9249	G	A	G	0.14	G	Pathogenic
rs9909593		PGAP3	A	G	0.9249	G	A	G	0.0056	G	Pathogenic
rs9909593		STARD3	A	G	0.9249	G	A	G	0.073	G	Pathogenic
rs9909593		TCAP	A	G	0.9249	G	A	G	0.11	G	Pathogenic
rs9909593		ZPBP2	A	G	0.9249	G	A	G	0.34	G	Pathogenic
chr1:154983036	rs112344141	FLAD1	T	G	0.8448	G	T	G	-0.035	T	Protective
chr1:154983036	rs112344141	KCNN3	T	G	0.8448	G	T	G	-0.21	T	Protective
chr1:154983036	rs112344141	PMVK	T	G	0.8448	G	T	G	-0.12	T	Protective
chr13:100026952	rs77654077	TM9SF2	A	C	1.11	A	A	C	0.075	C	Protective
chr14:88523488	rs116899835	GALC	C	T	1.3316	C	C	T	0.12	T	Protective
chr16:11213951	rs6498163	CLEC16A	T	C	0.8367	C	C	T	0.1	T	Protective
chr16:11353879	rs146566517	CLEC16A	C	T	0.9169	T	C	T	-0.081	C	Protective
chr16:11353879	rs146566517	RMI2	C	T	0.9169	T	C	T	-0.43	C	Protective
chr6:119215402	rs11542663	ASF1A	A	C	1.0776	A	A	C	0.11	C	Protective
chr6:119215402	rs11542663	MCM9	A	C	1.0776	A	A	C	0.34	C	Protective
chr6:14691215	rs111635774	CD83	C	T	1.1108	C	C	T	0.098	T	Protective
chr6:14691215	rs111635774	JARID2	C	T	1.1108	C	C	T	0.26	T	Protective
rs10191360		DARS	T	C	1.0836	T	T	C	0.015	C	Protective
rs10230723		IKZF1	A	T	1.0876	A	A	T	0.0055	T	Protective
rs1026916		STAT3	G	A	0.8976	A	A	G	0.041	G	Protective
rs1076928		ETV7	C	T	0.885	T	T	C	0.17	C	Protective
rs1076928		KCTD20	C	T	0.885	T	T	C	0.18	C	Protective
rs1076928		STK38	C	T	0.885	T	T	C	0.13	C	Protective
rs1077667		C3	C	T	1.1546	C	C	T	0.1	T	Protective
rs1077667		TNFSF14	C	T	1.1546	C	C	T	0.32	T	Protective
rs10801908		CD58	C	T	1.2987	C	C	T	0.29	T	Protective
rs1087056		ZEB1-AS1	G	A	0.9193	A	G	A	-0.08	G	Protective
rs10936602		LRRC34	T	C	1.0766	T	T	C	0.035	C	Protective
rs10936602		LRRIQ4	T	C	1.0766	T	T	C	0.28	C	Protective
rs10936602		MYNN	T	C	1.0766	T	T	C	0.12	C	Protective
rs10951042		CARD11	C	T	1.1021	C	T	C	-0.037	T	Protective
rs11079784		EFCAB13	C	T	1.1074	C	T	C	-0.14	T	Protective
rs11079784		TBX21	C	T	1.1074	C	T	C	-0.0033	T	Protective
rs11083862		HIF3A	A	T	1.0769	A	A	T	0.031	T	Protective
rs11083862		TMEM160	A	T	1.0769	A	A	T	0.12	T	Protective
rs11125803		ADCY3	T	C	0.9338	C	C	T	0.19	T	Protective
rs11125803		CENPO	T	C	0.9338	C	C	T	0.033	T	Protective
rs1112718		HHEX	A	G	1.086	A	A	G	0.11	G	Protective
rs11161550		C1orf52	A	G	0.9425	G	G	A	0.14	A	Protective
rs11161550		SYDE2	A	G	0.9425	G	G	A	0.21	A	Protective
rs11231749		FKBP2	C	T	1.0681	C	T	C	-0.2	T	Protective
rs11231749		GPR137	C	T	1.0681	C	T	C	-0.072	T	Protective
rs11231749		VEGFB	C	T	1.0681	C	T	C	-0.05	T	Protective
rs11256593		IL2RA	T	C	1.2062	T	C	T	-0.0028	C	Protective
rs11578655		DPH6	T	G	0.9203	G	T	G	-0.083	T	Protective
rs11578655		SLC30A7	T	G	0.9203	G	T	G	-0.038	T	Protective
rs11749040		DAB2	A	T	0.9331	T	G	A	0.072	A	Protective
rs11749040		PTGER4	A	T	0.9331	T	G	A	0.16	A	Protective
rs1177228		AHSA2	G	A	1.0953	G	A	G	-0.075	A	Protective
rs1177228		KIAA1841	G	A	1.0953	G	A	G	-0.043	A	Protective
rs11809700		EVI5	C	T	0.8849	T	C	T	-0.1	C	Protective
rs11852059		FRMD6	A	C	0.9132	C	A	C	-0.1	A	Protective
rs11852059		GNG2	A	C	0.9132	C	A	C	-0.11	A	Protective
rs11899404		TRIB2	T	C	0.9482	C	T	C	-0.0072	T	Protective
rs12147246		TRAF3	G	A	0.9138	A	A	G	0.16	G	Protective
rs12211604		RREB1	A	G	0.9386	G	G	A	0.01	A	Protective
rs12365699		PHLDB1	G	A	1.1237	G	G	A	0.057	A	Protective
rs12434551		ZFP36L1	A	T	1.0822	A	A	T	0.084	T	Protective
rs12478539		HAAO	G	C	1.1165	G	G	C	0.025	C	Protective
rs12478539		ZFP36L2	G	C	1.1165	G	G	C	0.16	C	Protective
rs12588969		RCOR1	C	G	0.9288	G	G	C	0.17	C	Protective
rs12588969		TRAF3	C	G	0.9288	G	G	C	0.39	C	Protective
rs12609500		AP1M2	C	T	1.0581	C	C	T	0.19	T	Protective
rs12609500		ATG4D	C	T	1.0581	C	C	T	0.0046	T	Protective
rs12609500		SMARCA4	C	T	1.0581	C	C	T	0.12	T	Protective
rs12614091		CTLA4	A	T	1.076	A	A	T	0.079	T	Protective
rs12614091		RAPH1	A	T	1.076	A	A	T	0.12	T	Protective
rs12622670		PLEK	T	C	1.0901	T	C	T	-0.027	C	Protective
rs12722559		IL2RA	C	A	1.1372	C	C	A	0.16	A	Protective
rs12925972		WWOX	C	T	1.107	C	T	C	-0.095	T	Protective
rs12971909		CHAF1A	G	A	0.9324	A	G	A	-0.024	G	Protective
rs12971909		UBXN6	G	A	0.9324	A	G	A	-0.0072	G	Protective
rs13066789		LPP	C	T	1.0666	C	C	T	0.092	T	Protective
rs13136820		CHRNA9	C	T	1.0775	C	C	T	0.03	T	Protective
rs13385171		ACTR2	C	T	1.0679	C	T	C	-0.032	T	Protective
rs137955		ENTHD1	T	C	1.0568	T	T	C	0.084	C	Protective
rs137955		GRAP2	T	C	1.0568	T	T	C	0.15	C	Protective
rs1399180		GATA3-AS1	T	C	0.9078	C	T	C	-0.21	T	Protective
rs1399180		TAF3	T	C	0.9078	C	T	C	-0.083	T	Protective
rs140522		CHKB	C	T	0.8962	T	T	C	0.058	C	Protective
rs140522		CPT1B	C	T	0.8962	T	T	C	0.24	C	Protective
rs140522		KLHDC7B	C	T	0.8962	T	T	C	0.16	C	Protective
rs140522		LMF2	C	T	0.8962	T	T	C	0.0018	C	Protective
rs140522		ODF3B	C	T	0.8962	T	T	C	0.23	C	Protective
rs140522		TYMP	C	T	0.8962	T	T	C	0.23	C	Protective
rs1415069		FAM69A	C	G	0.931	G	G	C	0.00091	C	Protective
rs1415069		GFI1	C	G	0.931	G	G	C	0.056	C	Protective
rs1415069		SNORA66	C	G	0.931	G	G	C	0.086	C	Protective
rs1465697		CCDC155	C	T	0.9113	T	C	T	-0.57	C	Protective
rs1465697		CD37	C	T	0.9113	T	C	T	-0.09	C	Protective
rs1465697		TEAD2	C	T	0.9113	T	C	T	-0.14	C	Protective
rs17741873		AGAP5	G	T	1.0676	G	G	T	0.097	T	Protective
rs17741873		ANXA7	G	T	1.0676	G	G	T	0.0037	T	Protective
rs17741873		CAMK2G	G	T	1.0676	G	G	T	0.068	T	Protective
rs17741873		DNAJC9	G	T	1.0676	G	G	T	0.017	T	Protective
rs17741873		FAM149B1	G	T	1.0676	G	G	T	0.042	T	Protective
rs17741873		PLAU	G	T	1.0676	G	G	T	0.0012	T	Protective
rs17741873		SYNPO2L	G	T	1.0676	G	G	T	0.006	T	Protective
rs17780048		IL22RA2	C	T	1.1008	C	C	T	0.038	T	Protective
rs1800693		PLEKHG6	T	C	0.87	C	T	C	-0.098	T	Protective
rs1800693		SCNN1A	T	C	0.87	C	T	C	-0.094	T	Protective
rs1801133		MFN2	A	G	0.9033	G	G	A	0.059	A	Protective
rs2084007		CAMLG	C	T	1.0835	C	C	T	0.028	T	Protective
rs2150879		RNFT1	G	A	1.1163	G	G	A	0.27	A	Protective
rs2150879		TUBD1	G	A	1.1163	G	G	A	0.14	A	Protective
rs2150879		VMP1	G	A	1.1163	G	G	A	0.1	A	Protective
rs2248137		BCAS1	G	C	0.9158	C	C	G	0.18	G	Protective
rs2269434		ACP2	T	C	0.9169	C	T	C	-0.23	T	Protective
rs2269434		MADD	T	C	0.9169	C	T	C	-0.042	T	Protective
rs2269434		MTCH2	T	C	0.9169	C	T	C	-0.05	T	Protective
rs2269434		MYBPC3	T	C	0.9169	C	T	C	-0.051	T	Protective
rs2269434		NR1H3	T	C	0.9169	C	T	C	-0.29	T	Protective
rs2269434		PSMC3	T	C	0.9169	C	T	C	-0.012	T	Protective
rs2269434		PTPRJ	T	C	0.9169	C	T	C	-0.019	T	Protective
rs2269434		SLC39A13	T	C	0.9169	C	T	C	-0.14	T	Protective
rs2269434		SPI1	T	C	0.9169	C	T	C	-0.052	T	Protective
rs2286974		CLEC16A	G	A	0.9084	A	A	G	0.028	G	Protective
rs2289746		CBLB	C	T	1.0846	C	T	C	-0.15	T	Protective
rs2317231		FCRL2	G	T	1.0804	G	G	T	0.029	T	Protective
rs2317231		FCRL3	G	T	1.0804	G	G	T	0.38	T	Protective
rs2327586		AHI1	T	C	1.1053	T	C	T	-0.059	C	Protective
rs2327586		ALDH8A1	T	C	1.1053	T	C	T	-0.0037	C	Protective
rs2327586		MYB	T	C	1.1053	T	C	T	-0.013	C	Protective
rs2331964		HCLS1	C	T	1.0948	C	T	C	-0.059	T	Protective
rs2364485		LTBR	C	A	0.8962	A	C	A	-0.055	C	Protective
rs2364485		TNFRSF1A	C	A	0.8962	A	C	A	-0.0015	C	Protective
rs244656		JADE2	A	T	1.1116	A	T	A	-0.052	T	Protective
rs2469434		CD226	T	C	0.9482	C	T	C	-0.21	T	Protective
rs2585447		BCAS1	T	C	0.9192	C	T	C	-0.045	T	Protective
rs2705616		AFF1	G	C	0.9283	C	C	G	0.11	G	Protective
rs2705616		C4orf36	G	C	0.9283	C	C	G	0.17	G	Protective
rs2836438		TMPRSS3	G	A	0.904	A	A	G	0.024	G	Protective
rs28703878		PKIA	A	G	0.9026	G	A	G	-0.25	A	Protective
rs28703878		ZC2HC1A	A	G	0.9026	G	A	G	-0.63	A	Protective
rs28834106		KEAP1	T	C	1.1171	T	T	C	0.14	C	Protective
rs28834106		PDE4A	T	C	1.1171	T	T	C	0.1	C	Protective
rs28834106		S1PR5	T	C	1.1171	T	T	C	0.036	C	Protective
rs28834106		SMARCA4	T	C	1.1171	T	T	C	0.023	C	Protective
rs2986736		ESPN	T	C	0.8928	C	T	C	-0.043	T	Protective
rs2986736		PLEKHG5	T	C	0.8928	C	T	C	-0.23	T	Protective
rs2986736		TNFRSF25	T	C	0.8928	C	T	C	-0.14	T	Protective
rs3184504		HECTD4	T	C	1.0643	T	T	C	0.0016	C	Protective
rs3184504		TRAFD1	T	C	1.0643	T	T	C	0.0041	C	Protective
rs34026809		CXCR5	C	G	0.917	G	G	C	0.43	C	Protective
rs34026809		DDX6	C	G	0.917	G	G	C	0.55	C	Protective
rs34026809		TMEM25	C	G	0.917	G	G	C	0.3	C	Protective
rs34681760		PAPD7	C	T	1.0819	C	T	C	-0.057	T	Protective
rs34695601		BATF	T	C	1.0832	T	T	C	0.13	C	Protective
rs34695601		FLVCR2	T	C	1.0832	T	T	C	0.05	C	Protective
rs35540610		SP110	C	T	1.1423	C	T	C	-0.27	T	Protective
rs35540610		SP140	C	T	1.1423	C	T	C	-0.47	T	Protective
rs35703946		IRF8	G	A	1.1315	G	G	A	0.044	A	Protective
rs3737798		CD48	A	G	1.0741	A	A	G	0.056	G	Protective
rs3809627		SEPT1	A	C	0.9138	C	C	A	0.0071	A	Protective
rs3809627		CORO1A	A	C	0.9138	C	C	A	0.03	A	Protective
rs3809627		DOC2A	A	C	0.9138	C	C	A	0.099	A	Protective
rs3809627		FAM57B	A	C	0.9138	C	C	A	0.34	A	Protective
rs3809627		GDPD3	A	C	0.9138	C	C	A	0.33	A	Protective
rs3809627		INO80E	A	C	0.9138	C	C	A	0.15	A	Protective
rs3809627		MAPK3	A	C	0.9138	C	C	A	0.37	A	Protective
rs3809627		PPP4C	A	C	0.9138	C	C	A	0.11	A	Protective
rs3809627		TAOK2	A	C	0.9138	C	C	A	0.045	A	Protective
rs3809627		TBC1D10B	A	C	0.9138	C	C	A	0.076	A	Protective
rs3809627		ZNF48	A	C	0.9138	C	C	A	0.17	A	Protective
rs3923387		MAF1	T	C	1.0639	T	C	T	-0.058	C	Protective
rs3923387		PARP10	T	C	1.0639	T	C	T	-0.017	C	Protective
rs3923387		PLEC	T	C	1.0639	T	C	T	-0.37	C	Protective
rs405343		SOX8	G	T	0.9082	T	G	T	-0.17	G	Protective
rs4325907		NFKBIZ	C	T	1.1557	C	C	T	0.14	T	Protective
rs4325907		PCNP	C	T	1.1557	C	C	T	0.062	T	Protective
rs4325907		SENP7	C	T	1.1557	C	C	T	0.0019	T	Protective
rs438613		CMC1	C	T	1.1504	C	T	C	-0.038	T	Protective
rs438613		EOMES	C	T	1.1504	C	T	C	-0.16	T	Protective
rs4728142		KCP	G	A	0.9449	A	G	A	-0.27	G	Protective
rs4728142		TNPO3	G	A	0.9449	A	G	A	-0.2	G	Protective
rs4796224		GGNBP2	A	G	0.9161	G	G	A	0.36	A	Protective
rs4808760		IFI30	G	C	0.893	C	C	G	0.1	G	Protective
rs4808760		KIAA1683	G	C	0.893	C	C	G	0.14	G	Protective
rs4808760		MPV17L2	G	C	0.893	C	C	G	0.15	G	Protective
rs4808760		RAB3A	G	C	0.893	C	C	G	0.12	G	Protective
rs4812772		TOX2	C	T	1.0743	C	T	C	-0.018	T	Protective
rs4896153		AHI1	A	T	0.8967	T	T	A	0.96	A	Protective
rs4896153		MYB	A	T	0.8967	T	T	A	0.19	A	Protective
rs531612		AP5B1	C	T	0.9355	T	C	T	-0.14	C	Protective
rs531612		EFEMP2	C	T	0.9355	T	C	T	-0.11	C	Protective
rs531612		FIBP	C	T	0.9355	T	C	T	-0.094	C	Protective
rs531612		FOSL1	C	T	0.9355	T	C	T	-0.044	C	Protective
rs531612		GAL3ST3	C	T	0.9355	T	C	T	-0.1	C	Protective
rs531612		SNX32	C	T	0.9355	T	C	T	-0.16	C	Protective
rs56095240		SESN3	T	A	0.9024	A	T	A	-0.24	T	Protective
rs57116599		ANAPC1	T	C	0.9346	C	G	A	-0.048	G	Protective
rs57116599		MERTK	T	C	0.9346	C	G	A	-0.14	G	Protective
rs57116599		TMEM87B	A	G	0.9137	G	G	A	0.041	A	Protective
rs5756405		CSF2RB	A	G	1.0645	A	A	G	0.29	G	Protective
rs5756405		NCF4	A	G	1.0645	A	A	G	0.18	G	Protective
rs58394161		EVI5	T	C	0.8829	C	T	C	-0.11	T	Protective
rs58394161		FAM69A	T	C	0.8829	C	T	C	-0.097	T	Protective
rs59655222		C1orf106	T	C	1.1049	T	T	C	0.0025	C	Protective
rs6020055		B4GALT5	A	G	1.0591	A	A	G	0.038	G	Protective
rs6032662		CD40	C	T	1.0995	C	C	T	0.087	T	Protective
rs6032662		NCOA5	C	T	1.0995	C	C	T	0.0031	T	Protective
rs6032662		SLC12A5	C	T	1.0995	C	C	T	0.19	T	Protective
rs60600003		ELMO1	T	G	0.8726	G	T	G	-0.19	T	Protective
rs6072343		CHD6	G	A	0.9246	A	G	A	-0.19	G	Protective
rs6072343		LPIN3	G	A	0.9246	A	G	A	-0.31	G	Protective
rs6072343		ZHX3	G	A	0.9246	A	G	A	-0.13	G	Protective
rs61708525		CEP83	G	A	1.0702	G	A	G	-0.12	A	Protective
rs61708525		PLXNC1	G	A	1.0702	G	A	G	-0.051	A	Protective
rs61863928		ADO	G	T	1.0891	G	G	T	0.028	T	Protective
rs61863928		ZNF365	G	T	1.0891	G	G	T	0.12	T	Protective
rs61884005		PDE3B	C	G	1.0953	C	C	G	0.36	G	Protective
rs61884005		RRAS2	C	G	1.0953	C	C	G	0.087	G	Protective
rs62013236		MORF4L1	C	T	1.106	C	C	T	0.059	T	Protective
rs6427540		SLAMF1	C	T	1.106	C	C	T	0.13	T	Protective
rs6427540		VANGL2	C	T	1.106	C	C	T	0.13	T	Protective
rs6533052		BDH2	A	G	1.0927	A	G	A	-0.0092	G	Protective
rs6533052		CENPE	A	G	1.0927	A	G	A	-0.0085	G	Protective
rs6533052		CISD2	A	G	1.0927	A	G	A	-0.044	G	Protective
rs6533052		NFKB1	A	G	1.0927	A	G	A	-0.055	G	Protective
rs6533052		UBE2D3	A	G	1.0927	A	G	A	-0.15	G	Protective
rs6564681		WWOX	T	C	0.9252	C	C	T	0.057	T	Protective
rs6589706		CXCR5	A	G	1.11	A	A	G	0.054	G	Protective
rs6670198		MMEL1	C	T	0.8797	T	T	C	0.056	C	Protective
rs6670198		PANK4	C	T	0.8797	T	T	C	0.1	C	Protective
rs6670198		PLCH2	C	T	0.8797	T	T	C	0.032	C	Protective
rs6670198		TNFRSF14	C	T	0.8797	T	T	C	0.17	C	Protective
rs6670198		TTC34	C	T	0.8797	T	T	C	0.4	C	Protective
rs6670198		UBE2D3	C	T	0.8797	T	T	C	0.087	C	Protective
rs6672420		RUNX3	T	A	0.9404	A	A	T	0.025	T	Protective
rs6672420		SYF2	T	A	0.9404	A	A	T	0.028	T	Protective
rs6738544		STAT4	C	A	1.0741	C	A	C	-0.17	A	Protective
rs6742		SLC2A4RG	C	T	1.1492	C	T	C	-0.0023	T	Protective
rs6742		ZGPAT	C	T	1.1492	C	T	C	-0.0086	T	Protective
rs6789653		RASA2	G	A	1.0595	G	G	A	0.15	A	Protective
rs6837324		NIPAL1	A	G	0.9376	G	A	G	-0.074	A	Protective
rs6837324		TXK	A	G	0.9376	G	A	G	-0.12	A	Protective
rs6911131		ADAT2	A	G	0.8919	G	A	G	-0.082	A	Protective
rs6911131		PHACTR2	A	G	0.8919	G	A	G	-0.12	A	Protective
rs6921288		L3MBTL3	T	C	1.0547	T	G	A	0.15	A	Protective
rs6990534		LINC00977	T	C	0.8891	C	A	G	0.026	G	Protective
rs6990534		POU5F1B	T	C	0.8891	C	A	G	-0.12	A	Protective
rs701006		MARCH9	G	A	1.124	G	A	G	-0.025	A	Protective
rs701006		AGAP2	G	A	1.124	G	A	G	-0.075	A	Protective
rs701006		ARHGEF25	G	A	1.124	G	A	G	-0.15	A	Protective
rs701006		B4GALNT1	G	A	1.124	G	A	G	-0.2	A	Protective
rs701006		METTL21B	G	A	1.124	G	A	G	-0.41	A	Protective
rs701006		SLC26A10	G	A	1.124	G	A	G	-0.2	A	Protective
rs719316		ATXN1	T	C	1.0723	T	C	T	-0.19	C	Protective
rs72928038		BACH2	G	A	0.8663	A	G	A	-0.13	G	Protective
rs73414214		SYPL1	C	A	1.1282	C	C	A	0.12	A	Protective
rs760517		CSF2RB	C	T	1.07	C	C	T	0.14	T	Protective
rs760517		NCF4	C	T	1.07	C	C	T	0.16	T	Protective
rs7975763		CDK2AP1	C	T	0.9214	T	C	T	-0.22	C	Protective
rs7975763		MPHOSPH9	C	T	0.9214	T	C	T	-0.016	C	Protective
rs7975763		RILPL2	C	T	0.9214	T	C	T	-0.017	C	Protective
rs7975763		SBNO1	C	T	0.9214	T	C	T	-0.0089	C	Protective
rs7975763		SNRNP35	C	T	0.9214	T	C	T	-0.14	C	Protective
rs7977720		KLRB1	C	T	0.9095	T	C	T	-0.31	C	Protective
rs883871		THRA	G	A	0.8865	A	G	A	-0.12	G	Protective
rs9308424		BATF3	A	G	0.9136	G	G	A	0.11	A	Protective
rs9308424		NSL1	A	G	0.9136	G	G	A	0.087	A	Protective
rs9568402		ST13P4	A	T	0.9175	T	A	T	-0.091	A	Protective
rs9610458		MAPK1	T	C	1.0893	T	C	T	-0.16	C	Protective
rs9610458		PPM1F	T	C	1.0893	T	C	T	-0.18	C	Protective
rs9610458		TOP3B	T	C	1.0893	T	C	T	-0.0069	C	Protective
rs962052		RBM43	C	T	1.0628	C	C	T	0.11	T	Protective
rs9808753		TMEM50B	G	A	1.082	G	A	G	-0.31	A	Protective
rs983494		CD48	G	A	1.0875	G	G	A	0.049	A	Protective
rs983494		LY9	G	A	1.0875	G	G	A	0.083	A	Protective
rs983494		VANGL2	G	A	1.0875	G	G	A	0.017	A	Protective
rs9843355		TMEM39A	G	A	1.1525	G	G	A	0.0083	A	Protective
rs9878602		FOXP1	T	G	1.1002	T	T	G	0.007	G	Protective
rs9900529		CASKIN2	C	G	1.0648	C	C	G	0.16	G	Protective
rs9900529		MRPS7	C	G	1.0648	C	C	G	0.29	G	Protective
rs9900529		SLC16A5	C	G	1.0648	C	C	G	0.12	G	Protective
rs9900529		SLC25A19	C	G	1.0648	C	C	G	0.067	G	Protective
rs9900529		TSEN54	C	G	1.0648	C	C	G	0.1	G	Protective
rs9909593		GSDMA	A	G	0.9249	G	A	G	-0.33	A	Protective
rs9909593		GSDMB	A	G	0.9249	G	A	G	-0.29	A	Protective
rs9909593		ORMDL3	A	G	0.9249	G	A	G	-0.64	A	Protective
rs9909593		PSMD3	A	G	0.9249	G	A	G	-0.0087	A	Protective
rs9955954		MALT1	G	A	0.918	A	A	G	0.0045	G	Protective
rs9992763		LEF1	T	G	0.9384	G	G	T	0.063	T	Protective
rs9992763		RPL34-AS1	T	G	0.9384	G	G	T	0.073	T	Protective
†: Odds ratio of A1 allele. §: Normalized expression of eQTL_A1 allele.
