# Supplementary material for: The RNA helicase DDX39B activates FOXP3 RNA splicing to control T regulatory cell fate
Source: eLife. 2023 Jun 1;12:e76927. doi: 10.7554/eLife.76927 (PMC10234631; doi:10.7554/eLife.76927)
Supplement: Supplementary file 4. — Related to Figure 3 and Figure 3—figure supplement 1. [file elife-76927-supp4.xlsx]

## Sheet: Enriched in NTC
Supplementary file 4. Gene sets enriched in cells with normal levels of DDX39B (NTC). Related to Figures 3 and Figure 3-figure supplement 1.
Gene sets enriched in NTC in C2 curated genesets of MSigDB v 6.2 (NOM p-val < 0.05, 648/5501 gene sets)
NAME	SIZE	ES	NES	NOM p-val	FDR q-val	FWER p-val	RANK AT MAX	LEADING EDGE
WILENSKY_RESPONSE_TO_DARAPLADIB	17	0.794537	2.20867	0	0.00012732	0.004	1427	tags=65%, list=12%, signal=73%
BENNETT_SYSTEMIC_LUPUS_ERYTHEMATOSUS	18	0.784193	2.23422	0	0	0	1940	tags=83%, list=16%, signal=99%
KEGG_INTESTINAL_IMMUNE_NETWORK_FOR_IGA_PRODUCTION	22	0.767593	2.26141	0	0	0	1370	tags=68%, list=11%, signal=77%
KIM_GLIS2_TARGETS_UP	23	0.766115	2.29866	0	0	0	1427	tags=70%, list=12%, signal=79%
EINAV_INTERFERON_SIGNATURE_IN_CANCER	22	0.76311	2.28806	0	0	0	978	tags=55%, list=8%, signal=59%
FARMER_BREAST_CANCER_CLUSTER_1	32	0.759736	2.46414	0	0	0	1219	tags=56%, list=10%, signal=62%
LIANG_SILENCED_BY_METHYLATION_2	20	0.729643	2.13493	0	0.000363282	0.015	600	tags=55%, list=5%, signal=58%
MOSERLE_IFNA_RESPONSE	25	0.729032	2.23229	0	0	0	2746	tags=80%, list=23%, signal=103%
ZHANG_INTERFERON_RESPONSE	18	0.728105	2.08626	0	0.000749609	0.038	2210	tags=72%, list=18%, signal=88%
BIOCARTA_NKT_PATHWAY	15	0.714119	1.93691	0.00171527	0.00512772	0.401	2616	tags=73%, list=22%, signal=94%
KEGG_ALLOGRAFT_REJECTION	23	0.710344	2.13174	0	0.000348145	0.015	2974	tags=83%, list=25%, signal=109%
HECKER_IFNB1_TARGETS	46	0.70911	2.50422	0	0	0	2015	tags=70%, list=17%, signal=83%
KEGG_GRAFT_VERSUS_HOST_DISEASE	22	0.707834	2.1335	0	0.000355553	0.015	2974	tags=82%, list=25%, signal=108%
KEGG_AUTOIMMUNE_THYROID_DISEASE	23	0.70725	2.15045	0	0.000317967	0.012	2974	tags=83%, list=25%, signal=109%
SAKAI_CHRONIC_HEPATITIS_VS_LIVER_CANCER_DN	18	0.702481	1.97566	0	0.00324263	0.247	789	tags=39%, list=7%, signal=42%
NAKAYAMA_SOFT_TISSUE_TUMORS_PCA2_UP	44	0.70188	2.38729	0	0	0	2938	tags=77%, list=24%, signal=102%
SEITZ_NEOPLASTIC_TRANSFORMATION_BY_8P_DELETION_UP	30	0.69883	2.27384	0	0	0	2529	tags=73%, list=21%, signal=93%
HUPER_BREAST_BASAL_VS_LUMINAL_DN	18	0.695347	1.96757	0	0.00347208	0.276	2993	tags=78%, list=25%, signal=103%
VALK_AML_CLUSTER_11	21	0.693646	2.01823	0	0.00205966	0.141	1942	tags=52%, list=16%, signal=62%
KEGG_SYSTEMIC_LUPUS_ERYTHEMATOSUS	39	0.693177	2.33754	0	0	0	2376	tags=62%, list=20%, signal=76%
KEGG_TYPE_I_DIABETES_MELLITUS	25	0.691274	2.10892	0	0.000537045	0.026	2974	tags=76%, list=25%, signal=101%
BROWNE_INTERFERON_RESPONSIVE_GENES	52	0.689259	2.43641	0	0	0	1940	tags=58%, list=16%, signal=68%
NABA_SECRETED_FACTORS	40	0.688494	2.3199	0	0	0	1427	tags=48%, list=12%, signal=54%
NOJIMA_SFRP2_TARGETS_DN	17	0.684669	1.89691	0	0.00742361	0.579	1150	tags=53%, list=10%, signal=58%
GRAHAM_CML_QUIESCENT_VS_NORMAL_QUIESCENT_DN	21	0.682941	2.05539	0	0.00116415	0.068	1825	tags=67%, list=15%, signal=78%
KUROZUMI_RESPONSE_TO_ONCOCYTIC_VIRUS	20	0.680571	1.971	0	0.00338664	0.263	2141	tags=65%, list=18%, signal=79%
DAUER_STAT3_TARGETS_DN	36	0.67814	2.25527	0	0	0	2529	tags=69%, list=21%, signal=88%
BOSCO_TH1_CYTOTOXIC_MODULE	59	0.677373	2.50981	0	0	0	1925	tags=54%, list=16%, signal=64%
LIU_SMARCA4_TARGETS	16	0.674633	1.868	0.0017331	0.0104126	0.726	912	tags=50%, list=8%, signal=54%
CHIARETTI_T_ALL_REFRACTORY_TO_THERAPY	17	0.673517	1.90531	0	0.00706063	0.546	2272	tags=59%, list=19%, signal=72%
KHETCHOUMIAN_TRIM24_TARGETS_UP	21	0.673128	1.98224	0	0.00315363	0.23	1271	tags=48%, list=11%, signal=53%
WHITFIELD_CELL_CYCLE_LITERATURE	36	0.673052	2.20038	0	0.000120437	0.004	1595	tags=44%, list=13%, signal=51%
KRASNOSELSKAYA_ILF3_TARGETS_UP	21	0.668596	1.95937	0	0.00396963	0.306	2007	tags=67%, list=17%, signal=80%
TANG_SENESCENCE_TP53_TARGETS_DN	41	0.662176	2.27691	0	0	0	3045	tags=68%, list=25%, signal=91%
GREENBAUM_E2A_TARGETS_UP	25	0.657264	2.02063	0	0.00199101	0.135	1953	tags=56%, list=16%, signal=67%
HELLEBREKERS_SILENCED_DURING_TUMOR_ANGIOGENESIS	26	0.647634	2.02993	0	0.001809	0.115	1681	tags=46%, list=14%, signal=54%
FURUKAWA_DUSP6_TARGETS_PCI35_UP	30	0.644345	2.07402	0	0.000875989	0.047	1352	tags=50%, list=11%, signal=56%
BIOCARTA_CELLCYCLE_PATHWAY	20	0.643628	1.87897	0	0.00930067	0.669	1111	tags=35%, list=9%, signal=38%
TAKEDA_TARGETS_OF_NUP98_HOXA9_FUSION_8D_UP	52	0.643154	2.28002	0	0	0	2136	tags=60%, list=18%, signal=72%
LEE_EARLY_T_LYMPHOCYTE_UP	62	0.641537	2.39828	0	0	0	1567	tags=45%, list=13%, signal=52%
GAUSSMANN_MLL_AF4_FUSION_TARGETS_G_DN	16	0.641518	1.70113	0.0101523	0.0415541	1	2878	tags=50%, list=24%, signal=66%
BOYAULT_LIVER_CANCER_SUBCLASS_G5_DN	22	0.640405	1.91805	0	0.00648345	0.479	3442	tags=68%, list=29%, signal=95%
REACTOME_TP53_REGULATES_TRANSCRIPTION_OF_GENES_INVOLVED_IN_G2_CELL_CYCLE_ARREST	15	0.639951	1.80166	0.00327869	0.0197969	0.944	943	tags=40%, list=8%, signal=43%
REACTOME_PHOSPHORYLATION_OF_CD3_AND_TCR_ZETA_CHAINS	22	0.639184	1.90847	0.00165563	0.00689095	0.532	2084	tags=41%, list=17%, signal=49%
GAURNIER_PSMD4_TARGETS	34	0.638775	2.09895	0	0.000722947	0.036	2974	tags=68%, list=25%, signal=90%
REACTOME_INTERLEUKIN_10_SIGNALING	17	0.637953	1.77772	0.00494234	0.0242236	0.981	1427	tags=47%, list=12%, signal=53%
REACTOME_PD_1_SIGNALING	22	0.637705	1.90744	0	0.00696869	0.538	2084	tags=45%, list=17%, signal=55%
BIOCARTA_CTLA4_PATHWAY	17	0.637689	1.80574	0.00167504	0.0192025	0.937	970	tags=29%, list=8%, signal=32%
APPEL_IMATINIB_RESPONSE	21	0.634399	1.90318	0	0.00709816	0.553	2442	tags=48%, list=20%, signal=60%
REACTOME_TRANSLOCATION_OF_ZAP_70_TO_IMMUNOLOGICAL_SYNAPSE	19	0.633181	1.807	0.00159236	0.0190216	0.935	2084	tags=42%, list=17%, signal=51%
TAKEDA_TARGETS_OF_NUP98_HOXA9_FUSION_3D_UP	79	0.629835	2.42539	0	0	0	2121	tags=53%, list=18%, signal=64%
RADAEVA_RESPONSE_TO_IFNA1_UP	42	0.628737	2.17265	0	0.000200379	0.007	1436	tags=45%, list=12%, signal=51%
BEIER_GLIOMA_STEM_CELL_DN	41	0.625121	2.14607	0	0.000346524	0.014	2699	tags=59%, list=22%, signal=75%
HERNANDEZ_MITOTIC_ARREST_BY_DOCETAXEL_1_DN	20	0.624874	1.84073	0.00168634	0.0142214	0.835	3039	tags=65%, list=25%, signal=87%
LASTOWSKA_COAMPLIFIED_WITH_MYCN	23	0.624382	1.84195	0	0.014146	0.832	1573	tags=35%, list=13%, signal=40%
YU_MYC_TARGETS_UP	36	0.623387	2.06359	0	0.00109903	0.061	1773	tags=39%, list=15%, signal=45%
CAIRO_PML_TARGETS_BOUND_BY_MYC_UP	17	0.622914	1.72673	0.00656814	0.0342378	0.999	1051	tags=35%, list=9%, signal=39%
ROSTY_CERVICAL_CANCER_PROLIFERATION_CLUSTER	112	0.622838	2.53955	0	0	0	2876	tags=55%, list=24%, signal=72%
REACTOME_G1_S_SPECIFIC_TRANSCRIPTION	22	0.622767	1.85193	0	0.0125854	0.794	943	tags=32%, list=8%, signal=34%
KEGG_ARGININE_AND_PROLINE_METABOLISM	24	0.622111	1.90139	0.00161551	0.00715998	0.56	3513	tags=63%, list=29%, signal=88%
ZHENG_FOXP3_TARGETS_UP	19	0.621989	1.78442	0.0015873	0.0233677	0.975	2563	tags=47%, list=21%, signal=60%
REACTOME_TNFS_BIND_THEIR_PHYSIOLOGICAL_RECEPTORS	15	0.619945	1.70006	0.00662252	0.0416851	1	1500	tags=60%, list=12%, signal=68%
MORI_PRE_BI_LYMPHOCYTE_UP	59	0.615231	2.2442	0	0	0	2096	tags=49%, list=17%, signal=59%
FLECHNER_BIOPSY_KIDNEY_TRANSPLANT_REJECTED_VS_OK_UP	61	0.614734	2.26247	0	0	0	2616	tags=51%, list=22%, signal=65%
ZHAN_MULTIPLE_MYELOMA_CD1_VS_CD2_UP	30	0.612896	1.93793	0	0.00518622	0.398	1515	tags=43%, list=13%, signal=49%
REACTOME_RHO_GTPASES_ACTIVATE_IQGAPS	17	0.61253	1.7064	0.00688468	0.0401072	1	1756	tags=47%, list=15%, signal=55%
REACTOME_COOPERATION_OF_PREFOLDIN_AND_TRIC_CCT_IN_ACTIN_AND_TUBULIN_FOLDING	21	0.611586	1.838	0.00169779	0.0143199	0.846	3427	tags=57%, list=28%, signal=80%
ZHAN_MULTIPLE_MYELOMA_PR_UP	33	0.609414	1.97876	0	0.00318106	0.236	3045	tags=61%, list=25%, signal=81%
HOQUE_METHYLATED_IN_CANCER	19	0.608731	1.7396	0.0116667	0.031511	0.998	1154	tags=37%, list=10%, signal=41%
NAKAYAMA_SOFT_TISSUE_TUMORS_PCA1_UP	32	0.608692	1.97823	0	0.00318254	0.239	2616	tags=69%, list=22%, signal=88%
LEE_LIVER_CANCER_MYC_E2F1_UP	28	0.607166	1.90696	0	0.00695742	0.539	1507	tags=39%, list=12%, signal=45%
RASHI_NFKB1_TARGETS	15	0.60716	1.64033	0.023569	0.0610738	1	2345	tags=47%, list=19%, signal=58%
SANA_RESPONSE_TO_IFNG_UP	53	0.606479	2.20386	0	0.000123783	0.004	2806	tags=66%, list=23%, signal=86%
HOFFMANN_IMMATURE_TO_MATURE_B_LYMPHOCYTE_UP	21	0.604918	1.77133	0.00336134	0.0257612	0.99	2256	tags=48%, list=19%, signal=58%
HANN_RESISTANCE_TO_BCL2_INHIBITOR_DN	16	0.604539	1.65018	0.0153322	0.0570088	1	2126	tags=50%, list=18%, signal=61%
CORRE_MULTIPLE_MYELOMA_UP	17	0.603979	1.69414	0.00330033	0.0430198	1	1515	tags=41%, list=13%, signal=47%
REACTOME_UPTAKE_AND_ACTIONS_OF_BACTERIAL_TOXINS	16	0.60344	1.63064	0.0170543	0.0646801	1	2086	tags=38%, list=17%, signal=45%
BROWNE_HCMV_INFECTION_6HR_UP	32	0.603433	1.94732	0	0.00472758	0.356	1422	tags=41%, list=12%, signal=46%
REACTOME_PREFOLDIN_MEDIATED_TRANSFER_OF_SUBSTRATE_TO_CCT_TRIC	20	0.602776	1.73331	0.00176991	0.0328635	0.998	3427	tags=55%, list=28%, signal=77%
FARMER_BREAST_CANCER_CLUSTER_2	29	0.602258	1.9175	0	0.00641141	0.48	2854	tags=55%, list=24%, signal=72%
TSUNODA_CISPLATIN_RESISTANCE_DN	17	0.601606	1.71756	0.00819672	0.0367231	1	2397	tags=53%, list=20%, signal=66%
OUILLETTE_CLL_13Q14_DELETION_DN	27	0.601477	1.88804	0	0.00842057	0.626	2938	tags=52%, list=24%, signal=68%
REACTOME_NUCLEOTIDE_SALVAGE	17	0.599209	1.69717	0.00848896	0.0422751	1	2577	tags=59%, list=21%, signal=75%
TAKEDA_TARGETS_OF_NUP98_HOXA9_FUSION_10D_UP	68	0.59888	2.24059	0	0	0	2121	tags=53%, list=18%, signal=64%
POOLA_INVASIVE_BREAST_CANCER_UP	147	0.598222	2.53734	0	0	0	2438	tags=50%, list=20%, signal=61%
KEGG_ANTIGEN_PROCESSING_AND_PRESENTATION	49	0.597097	2.14628	0	0.0003544	0.014	3210	tags=57%, list=27%, signal=78%
BIOCARTA_G1_PATHWAY	23	0.59674	1.81757	0.00160256	0.017311	0.911	1111	tags=30%, list=9%, signal=33%
KANG_DOXORUBICIN_RESISTANCE_UP	46	0.59509	2.05041	0	0.00125378	0.075	2906	tags=54%, list=24%, signal=71%
MORI_IMMATURE_B_LYMPHOCYTE_DN	73	0.594901	2.27415	0	0	0	2096	tags=48%, list=17%, signal=58%
CROONQUIST_IL6_DEPRIVATION_DN	75	0.59483	2.30938	0	0	0	1953	tags=45%, list=16%, signal=54%
AKL_HTLV1_INFECTION_UP	21	0.593776	1.72485	0.00661157	0.0348353	1	2896	tags=48%, list=24%, signal=63%
BOQUEST_STEM_CELL_DN	88	0.593471	2.32049	0	0	0	2306	tags=52%, list=19%, signal=64%
CHOW_RASSF1_TARGETS_DN	28	0.593307	1.87102	0.00324149	0.0101294	0.711	2639	tags=54%, list=22%, signal=68%
LY_AGING_OLD_DN	46	0.5933	2.09256	0	0.000768872	0.038	1953	tags=43%, list=16%, signal=52%
GRAHAM_CML_DIVIDING_VS_NORMAL_QUIESCENT_UP	121	0.593171	2.46647	0	0	0	2481	tags=50%, list=21%, signal=62%
MODY_HIPPOCAMPUS_NEONATAL	18	0.592553	1.68515	0.00680272	0.0462373	1	1666	tags=33%, list=14%, signal=39%
WEST_ADRENOCORTICAL_CARCINOMA_VS_ADENOMA_DN	16	0.592495	1.62727	0.0308748	0.0660123	1	2449	tags=50%, list=20%, signal=63%
DAZARD_UV_RESPONSE_CLUSTER_G2	15	0.592412	1.62507	0.0186125	0.0668405	1	645	tags=33%, list=5%, signal=35%
MARTINEZ_RESPONSE_TO_TRABECTEDIN	34	0.591345	1.91788	0	0.00642804	0.479	1356	tags=35%, list=11%, signal=40%
PID_IL12_2PATHWAY	45	0.590829	2.07549	0	0.000872242	0.046	802	tags=27%, list=7%, signal=28%
ISHIDA_E2F_TARGETS	46	0.589098	2.05094	0	0.00122461	0.072	1953	tags=48%, list=16%, signal=57%
JAEGER_METASTASIS_UP	16	0.588898	1.61109	0.0152027	0.0736557	1	2232	tags=44%, list=19%, signal=54%
PETROVA_ENDOTHELIUM_LYMPHATIC_VS_BLOOD_UP	59	0.587594	2.14894	0	0.000336261	0.013	3489	tags=63%, list=29%, signal=88%
KIM_LRRC3B_TARGETS	24	0.586832	1.76991	0.0032	0.0258936	0.99	2955	tags=71%, list=24%, signal=94%
CROONQUIST_NRAS_SIGNALING_DN	57	0.586812	2.11806	0	0.000437178	0.02	2437	tags=53%, list=20%, signal=66%
WENG_POR_TARGETS_LIVER_UP	22	0.586417	1.7812	0.00322581	0.0236602	0.979	1599	tags=36%, list=13%, signal=42%
KEGG_GLYCOSAMINOGLYCAN_BIOSYNTHESIS_CHONDROITIN_SULFATE	15	0.585516	1.58474	0.0264463	0.0838828	1	2027	tags=40%, list=17%, signal=48%
ZHAN_MULTIPLE_MYELOMA_CD2_DN	26	0.585435	1.82609	0	0.0164161	0.887	3346	tags=54%, list=28%, signal=74%
GAVIN_FOXP3_TARGETS_CLUSTER_P6	60	0.581924	2.1721	0	0.000195369	0.007	2906	tags=60%, list=24%, signal=79%
ONGUSAHA_TP53_TARGETS	24	0.581635	1.76421	0.00509338	0.027074	0.994	2701	tags=42%, list=22%, signal=54%
REACTOME_INTERFERON_ALPHA_BETA_SIGNALING	46	0.581008	2.05668	0	0.00114859	0.066	2974	tags=59%, list=25%, signal=78%
KEGG_LEISHMANIA_INFECTION	44	0.580553	2.01269	0	0.00215328	0.152	1374	tags=41%, list=11%, signal=46%
NEMETH_INFLAMMATORY_RESPONSE_LPS_DN	23	0.578721	1.76945	0.00657895	0.0259668	0.991	2832	tags=43%, list=23%, signal=57%
PID_DELTA_NP63_PATHWAY	23	0.578272	1.73643	0.00331675	0.0323054	0.998	1080	tags=26%, list=9%, signal=29%
CHIANG_LIVER_CANCER_SUBCLASS_CTNNB1_DN	55	0.577851	2.10991	0	0.000536243	0.026	1509	tags=36%, list=13%, signal=41%
REICHERT_MITOSIS_LIN9_TARGETS	22	0.577427	1.6904	0.00819672	0.0445251	1	1953	tags=45%, list=16%, signal=54%
WUNDER_INFLAMMATORY_RESPONSE_AND_CHOLESTEROL_UP	37	0.577419	1.94358	0	0.0048454	0.37	1854	tags=49%, list=15%, signal=57%
BOHN_PRIMARY_IMMUNODEFICIENCY_SYNDROM_UP	37	0.577109	1.93715	0	0.00515345	0.4	1257	tags=27%, list=10%, signal=30%
RIZ_ERYTHROID_DIFFERENTIATION_CCNE1	32	0.576645	1.87448	0.00476947	0.00971215	0.696	2903	tags=50%, list=24%, signal=66%
REACTOME_GROWTH_HORMONE_RECEPTOR_SIGNALING	16	0.576519	1.53637	0.0304569	0.105436	1	2532	tags=50%, list=21%, signal=63%
KANG_FLUOROURACIL_RESISTANCE_UP	15	0.576311	1.54003	0.0392491	0.102983	1	948	tags=27%, list=8%, signal=29%
ONO_AML1_TARGETS_UP	16	0.576272	1.61636	0.0175747	0.070531	1	1153	tags=50%, list=10%, signal=55%
WIELAND_UP_BY_HBV_INFECTION	81	0.575685	2.22957	0	3.42074e-05	0.001	3210	tags=65%, list=27%, signal=89%
ODONNELL_TARGETS_OF_MYC_AND_TFRC_DN	34	0.575262	1.86817	0.00156495	0.0104698	0.725	1920	tags=44%, list=16%, signal=52%
ICHIBA_GRAFT_VERSUS_HOST_DISEASE_D7_UP	66	0.574717	2.11372	0	0.000504589	0.024	1815	tags=45%, list=15%, signal=53%
FLORIO_NEOCORTEX_BASAL_RADIAL_GLIA_DN	107	0.574279	2.33592	0	0	0	2906	tags=52%, list=24%, signal=68%
GROSS_ELK3_TARGETS_DN	16	0.574201	1.5715	0.0237288	0.0897641	1	1928	tags=38%, list=16%, signal=45%
REACTOME_DNA_METHYLATION	18	0.573971	1.64366	0.0172712	0.0592864	1	2376	tags=50%, list=20%, signal=62%
GRAHAM_CML_QUIESCENT_VS_NORMAL_QUIESCENT_UP	52	0.573819	2.04151	0	0.00148642	0.092	1703	tags=42%, list=14%, signal=49%
TAKEDA_TARGETS_OF_NUP98_HOXA9_FUSION_16D_UP	72	0.573815	2.19434	0	0.000117268	0.004	2036	tags=49%, list=17%, signal=58%
ANDERSEN_LIVER_CANCER_KRT19_DN	26	0.573492	1.7822	0	0.0235579	0.977	1332	tags=31%, list=11%, signal=35%
JIANG_AGING_CEREBRAL_CORTEX_UP	20	0.573414	1.70025	0.012966	0.0417501	1	1324	tags=30%, list=11%, signal=34%
WALLACE_PROSTATE_CANCER_RACE_UP	170	0.573207	2.45625	0	0	0	1945	tags=44%, list=16%, signal=51%
REACTOME_PEROXISOMAL_LIPID_METABOLISM	19	0.572604	1.64419	0.0183639	0.0595631	1	1399	tags=37%, list=12%, signal=42%
SESTO_RESPONSE_TO_UV_C4	15	0.571909	1.55198	0.0358362	0.0995046	1	1274	tags=33%, list=11%, signal=37%
MARSON_FOXP3_CORE_DIRECT_TARGETS	15	0.571515	1.56433	0.0450607	0.0934037	1	435	tags=27%, list=4%, signal=28%
ROSS_ACUTE_MYELOID_LEUKEMIA_CBF	46	0.570613	2.02786	0	0.00186279	0.122	2260	tags=50%, list=19%, signal=61%
HELLER_SILENCED_BY_METHYLATION_UP	137	0.568835	2.38688	0	0	0	2578	tags=52%, list=21%, signal=65%
DANG_MYC_TARGETS_DN	23	0.566413	1.7185	0.00500835	0.0368361	1	1819	tags=39%, list=15%, signal=46%
BIOCARTA_CSK_PATHWAY	17	0.566151	1.58751	0.0354132	0.0822018	1	207	tags=18%, list=2%, signal=18%
KEGG_PRIMARY_IMMUNODEFICIENCY	21	0.564499	1.66167	0.0132231	0.0531014	1	2084	tags=43%, list=17%, signal=52%
TONKS_TARGETS_OF_RUNX1_RUNX1T1_FUSION_SUSTAINDED_IN_ERYTHROCYTE_UP	16	0.564457	1.55528	0.0283806	0.0977184	1	1445	tags=38%, list=12%, signal=43%
LIU_VAV3_PROSTATE_CARCINOGENESIS_UP	29	0.564128	1.78263	0	0.023584	0.977	1445	tags=45%, list=12%, signal=51%
BURTON_ADIPOGENESIS_10	23	0.563143	1.69704	0.0144231	0.0421349	1	1181	tags=26%, list=10%, signal=29%
CONCANNON_APOPTOSIS_BY_EPOXOMICIN_DN	89	0.562034	2.21861	0	3.32013e-05	0.001	2387	tags=49%, list=20%, signal=61%
LIANG_HEMATOPOIESIS_STEM_CELL_NUMBER_SMALL_VS_HUGE_UP	22	0.561669	1.67119	0.00841751	0.050224	1	1436	tags=41%, list=12%, signal=46%
FINETTI_BREAST_CANCER_KINOME_RED	16	0.561254	1.52494	0.0389171	0.110214	1	1644	tags=44%, list=14%, signal=51%
XU_AKT1_TARGETS_6HR	18	0.56123	1.5878	0.0214168	0.0822226	1	2121	tags=44%, list=18%, signal=54%
JECHLINGER_EPITHELIAL_TO_MESENCHYMAL_TRANSITION_UP	21	0.561018	1.65985	0.0167224	0.053848	1	657	tags=33%, list=5%, signal=35%
CHEOK_RESPONSE_TO_MERCAPTOPURINE_DN	16	0.560966	1.55694	0.0382695	0.0971569	1	2132	tags=44%, list=18%, signal=53%
MORI_LARGE_PRE_BII_LYMPHOCYTE_UP	72	0.560836	2.11455	0	0.00049305	0.023	2096	tags=44%, list=17%, signal=53%
EGUCHI_CELL_CYCLE_RB1_TARGETS	21	0.560125	1.6216	0.015625	0.068259	1	3109	tags=57%, list=26%, signal=77%
REACTOME_TRANSCRIPTIONAL_REGULATION_OF_GRANULOPOIESIS	37	0.559849	1.91616	0.00306279	0.00648857	0.488	2376	tags=38%, list=20%, signal=47%
LINDSTEDT_DENDRITIC_CELL_MATURATION_A	29	0.559383	1.77011	0.00164204	0.0259888	0.99	1646	tags=38%, list=14%, signal=44%
VALK_AML_CLUSTER_6	17	0.558906	1.56349	0.0172712	0.093835	1	1825	tags=47%, list=15%, signal=55%
SHETH_LIVER_CANCER_VS_TXNIP_LOSS_PAM6	30	0.558583	1.7547	0	0.0294128	0.996	1749	tags=23%, list=14%, signal=27%
WESTON_VEGFA_TARGETS_3HR	27	0.558314	1.76132	0.00329489	0.0276386	0.995	1677	tags=33%, list=14%, signal=39%
WORSCHECH_TUMOR_REJECTION_UP	25	0.558086	1.7149	0.00462963	0.0372121	1	2978	tags=52%, list=25%, signal=69%
GRAHAM_NORMAL_QUIESCENT_VS_NORMAL_DIVIDING_UP	31	0.557973	1.81057	0.0030581	0.018197	0.926	1602	tags=35%, list=13%, signal=41%
GRAHAM_NORMAL_QUIESCENT_VS_NORMAL_DIVIDING_DN	65	0.55745	2.08705	0.00145773	0.000762103	0.038	1973	tags=43%, list=16%, signal=51%
BORLAK_LIVER_CANCER_EGF_UP	26	0.557424	1.72927	0.00487013	0.0336179	0.999	2832	tags=50%, list=23%, signal=65%
KEGG_CELL_ADHESION_MOLECULES_CAMS	49	0.555217	1.9781	0	0.00317282	0.24	2974	tags=61%, list=25%, signal=81%
CAFFAREL_RESPONSE_TO_THC_24HR_5_UP	28	0.554592	1.75249	0.00315457	0.0293643	0.996	1731	tags=32%, list=14%, signal=37%
REACTOME_DISEASES_OF_IMMUNE_SYSTEM	16	0.552669	1.50653	0.0460526	0.119844	1	2779	tags=50%, list=23%, signal=65%
FRIDMAN_IMMORTALIZATION_DN	19	0.552395	1.58904	0.0275862	0.0820416	1	1111	tags=37%, list=9%, signal=41%
KEGG_CYTOKINE_CYTOKINE_RECEPTOR_INTERACTION	78	0.551763	2.1294	0	0.000386408	0.017	1500	tags=40%, list=12%, signal=45%
ABBUD_LIF_SIGNALING_1_DN	16	0.551647	1.57172	0.0308943	0.0898334	1	2608	tags=56%, list=22%, signal=72%
BURTON_ADIPOGENESIS_PEAK_AT_24HR	35	0.551514	1.81347	0	0.0179103	0.923	1920	tags=51%, list=16%, signal=61%
BURTON_ADIPOGENESIS_1	18	0.551442	1.59148	0.0260417	0.0808951	1	736	tags=28%, list=6%, signal=30%
BROWNE_HCMV_INFECTION_2HR_DN	27	0.551022	1.75019	0.00490998	0.0293599	0.996	1835	tags=37%, list=15%, signal=44%
ALCALAY_AML_BY_NPM1_LOCALIZATION_DN	123	0.549859	2.27466	0	0	0	3010	tags=55%, list=25%, signal=73%
FOURNIER_ACINAR_DEVELOPMENT_LATE_DN	18	0.548914	1.56181	0.0281924	0.0948938	1	2073	tags=44%, list=17%, signal=54%
RHODES_UNDIFFERENTIATED_CANCER	60	0.548465	2.02545	0	0.00192354	0.126	2735	tags=48%, list=23%, signal=62%
KEGG_VIRAL_MYOCARDITIS	41	0.548279	1.87866	0	0.00924998	0.669	1370	tags=34%, list=11%, signal=38%
PID_HIF2PATHWAY	20	0.547846	1.58826	0.0176565	0.0821641	1	2021	tags=30%, list=17%, signal=36%
REACTOME_GENERATION_OF_SECOND_MESSENGER_MOLECULES	29	0.547677	1.76464	0.00166113	0.0270871	0.994	2084	tags=34%, list=17%, signal=42%
VILIMAS_NOTCH1_TARGETS_UP	36	0.546843	1.81986	0	0.0172406	0.905	2345	tags=47%, list=19%, signal=58%
REACTOME_CARBOXYTERMINAL_POST_TRANSLATIONAL_MODIFICATIONS_OF_TUBULIN	16	0.54615	1.50552	0.0358891	0.119863	1	2250	tags=63%, list=19%, signal=77%
GYORFFY_MITOXANTRONE_RESISTANCE	17	0.544751	1.50987	0.0393836	0.118009	1	3086	tags=59%, list=26%, signal=79%
YIH_RESPONSE_TO_ARSENITE_C3	24	0.543791	1.65623	0.00806452	0.0543419	1	1839	tags=38%, list=15%, signal=44%
KUNINGER_IGF1_VS_PDGFB_TARGETS_DN	18	0.543746	1.52211	0.0328947	0.111492	1	2437	tags=44%, list=20%, signal=56%
ZHAN_EARLY_DIFFERENTIATION_GENES_DN	36	0.542003	1.78806	0.00306279	0.0226815	0.972	1920	tags=36%, list=16%, signal=43%
REACTOME_PEPTIDE_LIGAND_BINDING_RECEPTORS	20	0.541546	1.60369	0.0178571	0.076563	1	1427	tags=50%, list=12%, signal=57%
VANLOO_SP3_TARGETS_DN	45	0.541438	1.91035	0	0.00683955	0.527	2111	tags=49%, list=17%, signal=59%
SHIN_B_CELL_LYMPHOMA_CLUSTER_8	24	0.540821	1.63125	0.0160514	0.0645601	1	1647	tags=38%, list=14%, signal=43%
DER_IFN_ALPHA_RESPONSE_UP	62	0.540785	2.00905	0	0.00233157	0.166	2873	tags=45%, list=24%, signal=59%
WESTON_VEGFA_TARGETS	30	0.540357	1.77507	0.00996678	0.0248274	0.984	1677	tags=33%, list=14%, signal=39%
ZHAN_MULTIPLE_MYELOMA_LB_DN	31	0.540354	1.73149	0.0015625	0.033187	0.999	2061	tags=48%, list=17%, signal=58%
NELSON_RESPONSE_TO_ANDROGEN_UP	53	0.540104	1.91276	0	0.00674912	0.513	2687	tags=47%, list=22%, signal=60%
LEE_TARGETS_OF_PTCH1_AND_SUFU_DN	23	0.539983	1.60639	0.010989	0.0753845	1	2086	tags=43%, list=17%, signal=52%
HADDAD_T_LYMPHOCYTE_AND_NK_PROGENITOR_DN	21	0.538637	1.57705	0.0390244	0.0881372	1	433	tags=29%, list=4%, signal=30%
PRAMOONJAGO_SOX4_TARGETS_DN	38	0.538598	1.82311	0	0.0168798	0.895	1195	tags=26%, list=10%, signal=29%
HAHTOLA_MYCOSIS_FUNGOIDES_CD4_UP	29	0.537532	1.6979	0.00809062	0.0421426	1	2449	tags=45%, list=20%, signal=56%
CASTELLANO_NRAS_TARGETS_UP	32	0.536803	1.7324	0.00316456	0.0330185	0.999	2939	tags=59%, list=24%, signal=78%
GRADE_COLON_VS_RECTAL_CANCER_UP	27	0.535746	1.69506	0.00454545	0.0428055	1	1916	tags=37%, list=16%, signal=44%
FURUKAWA_DUSP6_TARGETS_PCI35_DN	44	0.535665	1.86626	0	0.0105443	0.733	2438	tags=55%, list=20%, signal=68%
REACTOME_INTERCONVERSION_OF_NUCLEOTIDE_DI_AND_TRIPHOSPHATES	22	0.53528	1.5949	0.0251572	0.0795069	1	2701	tags=50%, list=22%, signal=64%
SABATES_COLORECTAL_ADENOMA_UP	20	0.535091	1.55368	0.0294599	0.0986069	1	2901	tags=55%, list=24%, signal=72%
LE_EGR2_TARGETS_UP	72	0.534603	2.01515	0	0.00210089	0.146	2563	tags=50%, list=21%, signal=63%
ZHAN_MULTIPLE_MYELOMA_MF_UP	17	0.534319	1.51055	0.0349206	0.117868	1	1622	tags=29%, list=13%, signal=34%
REACTOME_INTERFERON_GAMMA_SIGNALING	65	0.534074	2.00147	0	0.0025149	0.181	2974	tags=55%, list=25%, signal=73%
KOKKINAKIS_METHIONINE_DEPRIVATION_96HR_DN	54	0.533988	1.905	0	0.0070059	0.546	2637	tags=50%, list=22%, signal=64%
WHITEFORD_PEDIATRIC_CANCER_MARKERS	88	0.533163	2.08832	0	0.00075584	0.038	2854	tags=52%, list=24%, signal=68%
NEMETH_INFLAMMATORY_RESPONSE_LPS_UP	61	0.530773	1.97545	0	0.00322147	0.248	2591	tags=46%, list=21%, signal=58%
GRAHAM_CML_DIVIDING_VS_NORMAL_QUIESCENT_DN	49	0.530629	1.86127	0	0.0111254	0.754	2563	tags=45%, list=21%, signal=57%
GEISS_RESPONSE_TO_DSRNA_UP	25	0.530343	1.63133	0.0167785	0.0647028	1	1756	tags=44%, list=15%, signal=51%
CAFFAREL_RESPONSE_TO_THC_DN	28	0.530137	1.65955	0.00815661	0.0537885	1	2029	tags=39%, list=17%, signal=47%
ZHU_CMV_8_HR_UP	27	0.529626	1.65412	0.00638978	0.055103	1	2908	tags=52%, list=24%, signal=68%
BASSO_CD40_SIGNALING_UP	75	0.529033	2.02539	0	0.00191312	0.126	2394	tags=45%, list=20%, signal=56%
LI_INDUCED_T_TO_NATURAL_KILLER_UP	190	0.527776	2.3014	0	0	0	2647	tags=46%, list=22%, signal=58%
APPIERTO_RESPONSE_TO_FENRETINIDE_DN	38	0.527452	1.77835	0.00156495	0.024162	0.981	982	tags=24%, list=8%, signal=26%
KEGG_HEMATOPOIETIC_CELL_LINEAGE	34	0.527172	1.70308	0.00461538	0.0411471	1	263	tags=21%, list=2%, signal=21%
BREDEMEYER_RAG_SIGNALING_NOT_VIA_ATM_DN	29	0.524938	1.66772	0.00791139	0.05051	1	1484	tags=31%, list=12%, signal=35%
YAGI_AML_RELAPSE_PROGNOSIS	26	0.524356	1.63015	0.0192308	0.0647433	1	3498	tags=65%, list=29%, signal=92%
GUTIERREZ_MULTIPLE_MYELOMA_UP	29	0.524236	1.68768	0.00810373	0.0453178	1	1550	tags=34%, list=13%, signal=39%
ZHAN_MULTIPLE_MYELOMA_HP_UP	33	0.523918	1.70926	0.00625	0.0391544	1	1937	tags=42%, list=16%, signal=50%
BOYLAN_MULTIPLE_MYELOMA_PCA1_UP	40	0.523582	1.77963	0.00469484	0.0239184	0.981	2212	tags=48%, list=18%, signal=58%
LANDIS_ERBB2_BREAST_TUMORS_65_DN	19	0.52335	1.53009	0.0353698	0.107606	1	3143	tags=63%, list=26%, signal=85%
ZHAN_MULTIPLE_MYELOMA_CD1_UP	21	0.522678	1.53553	0.0347682	0.105667	1	1532	tags=38%, list=13%, signal=44%
REACTOME_GLYCOSPHINGOLIPID_METABOLISM	29	0.522633	1.6882	0.00967742	0.0452866	1	1029	tags=24%, list=9%, signal=26%
SHETH_LIVER_CANCER_VS_TXNIP_LOSS_PAM3	28	0.522619	1.62198	0.0111288	0.0682503	1	1320	tags=46%, list=11%, signal=52%
PID_IL4_2PATHWAY	36	0.522386	1.71704	0.00458015	0.0367612	1	3072	tags=50%, list=25%, signal=67%
LIU_PROSTATE_CANCER_UP	51	0.522135	1.89358	0	0.00777835	0.596	1881	tags=29%, list=16%, signal=35%
BOYLAN_MULTIPLE_MYELOMA_C_D_DN	104	0.52193	2.12116	0	0.00040106	0.018	2590	tags=49%, list=21%, signal=62%
RAGHAVACHARI_PLATELET_SPECIFIC_GENES	41	0.521673	1.7841	0.0015528	0.0233056	0.976	1727	tags=34%, list=14%, signal=40%
LY_AGING_PREMATURE_DN	22	0.520616	1.51537	0.043771	0.115091	1	1953	tags=45%, list=16%, signal=54%
SARRIO_EPITHELIAL_MESENCHYMAL_TRANSITION_DN	77	0.519442	1.99293	0	0.00276257	0.199	2442	tags=44%, list=20%, signal=55%
LINDSTEDT_DENDRITIC_CELL_MATURATION_B	36	0.518505	1.74854	0.00454545	0.0296859	0.997	2609	tags=50%, list=22%, signal=64%
REACTOME_RECYCLING_PATHWAY_OF_L1	26	0.517316	1.6106	0.0129241	0.0737827	1	1661	tags=38%, list=14%, signal=45%
REN_BOUND_BY_E2F	54	0.51721	1.88118	0	0.00921466	0.664	1647	tags=35%, list=14%, signal=41%
SOTIRIOU_BREAST_CANCER_GRADE_1_VS_3_UP	123	0.516603	2.10914	0	0.000546809	0.026	3287	tags=48%, list=27%, signal=65%
MARZEC_IL2_SIGNALING_UP	74	0.516507	1.9697	0	0.00339739	0.267	2502	tags=45%, list=21%, signal=56%
DAVICIONI_PAX_FOXO1_SIGNATURE_IN_ARMS_UP	24	0.51616	1.5772	0.0211382	0.0882613	1	2616	tags=46%, list=22%, signal=58%
DAVICIONI_TARGETS_OF_PAX_FOXO1_FUSIONS_DN	25	0.516134	1.5491	0.0194805	0.0996408	1	2151	tags=44%, list=18%, signal=53%
SMIRNOV_RESPONSE_TO_IR_6HR_DN	77	0.515964	1.97342	0	0.00333255	0.257	1945	tags=38%, list=16%, signal=45%
ONO_FOXP3_TARGETS_DN	33	0.515287	1.68402	0.00769231	0.0466039	1	1590	tags=33%, list=13%, signal=38%
MURAKAMI_UV_RESPONSE_6HR_UP	19	0.514496	1.46916	0.0357143	0.141536	1	2637	tags=42%, list=22%, signal=54%
REACTOME_ACTIVATED_PKN1_STIMULATES_TRANSCRIPTION_OF_AR_ANDROGEN_RECEPTOR_REGULATED_GENES_KLK2_AND_KLK3	19	0.51381	1.49972	0.0439932	0.124505	1	2376	tags=42%, list=20%, signal=52%
NABA_MATRISOME_ASSOCIATED	104	0.513297	2.08283	0	0.000737519	0.038	1427	tags=33%, list=12%, signal=37%
BARRIER_CANCER_RELAPSE_NORMAL_SAMPLE_UP	19	0.512269	1.47707	0.0405405	0.137951	1	3656	tags=58%, list=30%, signal=83%
YAO_TEMPORAL_RESPONSE_TO_PROGESTERONE_CLUSTER_15	17	0.512061	1.43485	0.0448505	0.166283	1	2832	tags=59%, list=23%, signal=77%
DELPUECH_FOXO3_TARGETS_DN	30	0.512038	1.62051	0.00775194	0.0682697	1	1738	tags=33%, list=14%, signal=39%
DELASERNA_MYOD_TARGETS_DN	27	0.511786	1.5963	0.0144	0.0789371	1	1880	tags=41%, list=16%, signal=48%
CHIANG_LIVER_CANCER_SUBCLASS_PROLIFERATION_DN	42	0.511587	1.77264	0.0015083	0.0254896	0.988	2366	tags=43%, list=20%, signal=53%
LI_LUNG_CANCER	26	0.509706	1.59429	0.0189573	0.0796474	1	1420	tags=31%, list=12%, signal=35%
REACTOME_CONDENSATION_OF_PROPHASE_CHROMOSOMES	27	0.509491	1.60572	0.00641026	0.0753999	1	2376	tags=44%, list=20%, signal=55%
BIOCARTA_NFKB_PATHWAY	20	0.509319	1.48154	0.0449438	0.134631	1	924	tags=25%, list=8%, signal=27%
BOGNI_TREATMENT_RELATED_MYELOID_LEUKEMIA_DN	28	0.509124	1.62365	0.0165289	0.067374	1	861	tags=25%, list=7%, signal=27%
BECKER_TAMOXIFEN_RESISTANCE_UP	28	0.508185	1.59703	0.0159744	0.0789174	1	2520	tags=43%, list=21%, signal=54%
ZHAN_V1_LATE_DIFFERENTIATION_GENES_UP	23	0.508116	1.52813	0.0357724	0.108397	1	2345	tags=43%, list=19%, signal=54%
HOFFMANN_SMALL_PRE_BII_TO_IMMATURE_B_LYMPHOCYTE_UP	33	0.507337	1.67933	0.0084317	0.0475091	1	1889	tags=45%, list=16%, signal=54%
FOSTER_TOLERANT_MACROPHAGE_UP	75	0.506246	1.93317	0	0.00541452	0.419	1928	tags=33%, list=16%, signal=39%
HAHTOLA_SEZARY_SYNDROM_DN	21	0.50487	1.50856	0.0437601	0.118426	1	1427	tags=38%, list=12%, signal=43%
HOEBEKE_LYMPHOID_STEM_CELL_DN	59	0.504838	1.83877	0	0.0144047	0.842	2477	tags=47%, list=21%, signal=59%
ANDERSEN_CHOLANGIOCARCINOMA_CLASS2	44	0.504748	1.75117	0.00747384	0.0293157	0.996	2901	tags=52%, list=24%, signal=69%
LANDIS_ERBB2_BREAST_PRENEOPLASTIC_DN	35	0.50458	1.68081	0.00464396	0.0473162	1	3143	tags=49%, list=26%, signal=65%
ACEVEDO_LIVER_CANCER_WITH_H3K27ME3_UP	71	0.504239	1.90129	0	0.00713142	0.562	2664	tags=42%, list=22%, signal=54%
HAHTOLA_SEZARY_SYNDROM_UP	76	0.503696	1.93786	0	0.00513949	0.398	3699	tags=61%, list=31%, signal=87%
CERVERA_SDHB_TARGETS_2	29	0.502934	1.62128	0.0160256	0.0682445	1	1082	tags=34%, list=9%, signal=38%
PID_FOXM1_PATHWAY	29	0.502614	1.58935	0.0210016	0.0820375	1	1644	tags=34%, list=14%, signal=40%
SUNG_METASTASIS_STROMA_UP	57	0.501254	1.81894	0	0.0172644	0.906	2569	tags=44%, list=21%, signal=55%
JOHANSSON_GLIOMAGENESIS_BY_PDGFB_UP	38	0.501208	1.67542	0.00787402	0.0483499	1	3103	tags=50%, list=26%, signal=67%
ICHIBA_GRAFT_VERSUS_HOST_DISEASE_35D_UP	77	0.50097	1.93201	0	0.00549258	0.426	1462	tags=36%, list=12%, signal=41%
ZHONG_SECRETOME_OF_LUNG_CANCER_AND_ENDOTHELIUM	37	0.500748	1.68259	0.00157729	0.0468617	1	2443	tags=41%, list=20%, signal=51%
CAMPS_COLON_CANCER_COPY_NUMBER_DN	22	0.499764	1.48503	0.0403361	0.132708	1	2955	tags=59%, list=24%, signal=78%
SCHUETZ_BREAST_CANCER_DUCTAL_INVASIVE_UP	115	0.499695	2.04751	0	0.0013414	0.081	2028	tags=42%, list=17%, signal=50%
JAZAG_TGFB1_SIGNALING_VIA_SMAD4_DN	33	0.499471	1.62475	0.0125392	0.0668821	1	1442	tags=24%, list=12%, signal=27%
DOANE_BREAST_CANCER_CLASSES_UP	22	0.499449	1.50957	0.0416	0.117986	1	1404	tags=32%, list=12%, signal=36%
CHANG_IMMORTALIZED_BY_HPV31_DN	26	0.499363	1.54504	0.0242718	0.101136	1	1940	tags=46%, list=16%, signal=55%
WINZEN_DEGRADED_VIA_KHSRP	25	0.499195	1.50596	0.0384	0.119898	1	3120	tags=48%, list=26%, signal=65%
CHIANG_LIVER_CANCER_SUBCLASS_PROLIFERATION_UP	112	0.497912	2.03463	0	0.00168614	0.106	3104	tags=46%, list=26%, signal=62%
CHIARADONNA_NEOPLASTIC_TRANSFORMATION_KRAS_CDC25_UP	31	0.497862	1.6009	0.016692	0.0778095	1	1843	tags=35%, list=15%, signal=42%
MARKEY_RB1_CHRONIC_LOF_DN	47	0.496638	1.76137	0.00293686	0.0277789	0.995	2578	tags=40%, list=21%, signal=51%
BOSCO_INTERFERON_INDUCED_ANTIVIRAL_MODULE	57	0.495525	1.81787	0	0.0173691	0.91	2121	tags=44%, list=18%, signal=53%
HENDRICKS_SMARCA4_TARGETS_DN	26	0.495366	1.53799	0.0334448	0.104211	1	1194	tags=27%, list=10%, signal=30%
LEE_LIVER_CANCER_E2F1_UP	23	0.495069	1.49093	0.0478395	0.130826	1	2484	tags=43%, list=21%, signal=55%
BALDWIN_PRKCI_TARGETS_UP	24	0.494634	1.48442	0.0417335	0.132578	1	1304	tags=29%, list=11%, signal=33%
CROONQUIST_NRAS_VS_STROMAL_STIMULATION_DN	55	0.494493	1.76661	0.00147275	0.0266967	0.994	1954	tags=53%, list=16%, signal=63%
MCLACHLAN_DENTAL_CARIES_UP	111	0.493524	2.02468	0	0.00193108	0.129	2345	tags=42%, list=19%, signal=52%
WHITFIELD_CELL_CYCLE_G2	120	0.492633	2.02219	0	0.00196174	0.132	1793	tags=36%, list=15%, signal=42%
SANA_TNF_SIGNALING_UP	46	0.491639	1.73543	0.00304878	0.0324505	0.998	2955	tags=54%, list=24%, signal=72%
SAFFORD_T_LYMPHOCYTE_ANERGY	46	0.491336	1.69973	0.00483092	0.041652	1	3028	tags=48%, list=25%, signal=64%
REACTOME_FATTY_ACYL_COA_BIOSYNTHESIS	25	0.491254	1.53222	0.0341463	0.106726	1	4089	tags=60%, list=34%, signal=91%
NABA_ECM_REGULATORS	40	0.490957	1.66829	0.011041	0.0505997	1	1262	tags=28%, list=10%, signal=31%
GAVIN_FOXP3_TARGETS_CLUSTER_P4	50	0.489109	1.73079	0.00304878	0.0332858	0.999	2519	tags=48%, list=21%, signal=60%
SANSOM_WNT_PATHWAY_REQUIRE_MYC	28	0.489027	1.52367	0.0441899	0.110608	1	2941	tags=36%, list=24%, signal=47%
HUANG_DASATINIB_RESISTANCE_DN	37	0.488439	1.63356	0.00896861	0.0639006	1	2591	tags=35%, list=21%, signal=45%
VART_KSHV_INFECTION_ANGIOGENIC_MARKERS_UP	30	0.488399	1.5492	0.0158228	0.0998059	1	1925	tags=40%, list=16%, signal=47%
ZHENG_GLIOBLASTOMA_PLASTICITY_UP	113	0.487479	2.00304	0	0.00251816	0.179	1920	tags=37%, list=16%, signal=44%
MORI_MATURE_B_LYMPHOCYTE_DN	53	0.487123	1.76384	0.0015015	0.0271069	0.994	3045	tags=42%, list=25%, signal=55%
MARSON_FOXP3_TARGETS_STIMULATED_UP	23	0.486547	1.4785	0.0436893	0.136989	1	1372	tags=26%, list=11%, signal=29%
CHEBOTAEV_GR_TARGETS_UP	28	0.486293	1.54358	0.0326797	0.101694	1	2502	tags=46%, list=21%, signal=58%
PID_IL2_STAT5_PATHWAY	27	0.483959	1.49721	0.0444079	0.126138	1	3116	tags=48%, list=26%, signal=65%
NADERI_BREAST_CANCER_PROGNOSIS_UP	32	0.482843	1.54962	0.0258481	0.0997159	1	2509	tags=38%, list=21%, signal=47%
SESTO_RESPONSE_TO_UV_C6	26	0.482668	1.49042	0.0369775	0.130838	1	3117	tags=50%, list=26%, signal=67%
DOANE_BREAST_CANCER_ESR1_UP	28	0.482554	1.52113	0.0263591	0.112115	1	1977	tags=36%, list=16%, signal=43%
ELVIDGE_HIF1A_AND_HIF2A_TARGETS_DN	49	0.482288	1.71815	0	0.0368265	1	2093	tags=35%, list=17%, signal=42%
TCGA_GLIOBLASTOMA_COPY_NUMBER_DN	25	0.482235	1.48003	0.0381558	0.135905	1	1868	tags=44%, list=15%, signal=52%
HORIUCHI_WTAP_TARGETS_DN	251	0.482094	2.16832	0	0.000190604	0.007	2563	tags=37%, list=21%, signal=46%
BIOCARTA_IL2RB_PATHWAY	33	0.482059	1.62028	0.0126582	0.068204	1	428	tags=18%, list=4%, signal=19%
HOOI_ST7_TARGETS_DN	41	0.48075	1.64774	0.00615385	0.0576827	1	1563	tags=27%, list=13%, signal=31%
ELVIDGE_HIF1A_AND_HIF2A_TARGETS_UP	30	0.479767	1.54692	0.0192308	0.09982	1	974	tags=23%, list=8%, signal=25%
ODONNELL_TFRC_TARGETS_DN	85	0.479516	1.85057	0	0.0126178	0.798	1920	tags=34%, list=16%, signal=40%
KEGG_PPAR_SIGNALING_PATHWAY	28	0.479356	1.51168	0.0410509	0.117298	1	1491	tags=29%, list=12%, signal=33%
WOO_LIVER_CANCER_RECURRENCE_UP	47	0.479301	1.67659	0.00458015	0.0481416	1	3279	tags=47%, list=27%, signal=64%
COULOUARN_TEMPORAL_TGFB1_SIGNATURE_DN	74	0.477658	1.80553	0	0.01913	0.937	1181	tags=31%, list=10%, signal=34%
REACTOME_DETOXIFICATION_OF_REACTIVE_OXYGEN_SPECIES	25	0.477393	1.44246	0.0489039	0.16076	1	3042	tags=48%, list=25%, signal=64%
JIANG_AGING_HYPOTHALAMUS_UP	34	0.477224	1.55923	0.0184332	0.0959335	1	3134	tags=44%, list=26%, signal=59%
REACTOME_BASE_EXCISION_REPAIR_AP_SITE_FORMATION	28	0.476907	1.48934	0.0336538	0.130115	1	2261	tags=43%, list=19%, signal=53%
ROSS_LEUKEMIA_WITH_MLL_FUSIONS	44	0.476548	1.66487	0	0.0516969	1	2518	tags=34%, list=21%, signal=43%
KEGG_NEUROACTIVE_LIGAND_RECEPTOR_INTERACTION	29	0.476057	1.51761	0.0323077	0.114273	1	1925	tags=38%, list=16%, signal=45%
KOBAYASHI_EGFR_SIGNALING_24HR_DN	179	0.475886	2.05206	0	0.001195	0.069	2080	tags=35%, list=17%, signal=42%
ONO_AML1_TARGETS_DN	32	0.475488	1.53923	0.0196721	0.103392	1	1682	tags=31%, list=14%, signal=36%
VERHAAK_AML_WITH_NPM1_MUTATED_DN	109	0.47548	1.90955	0	0.00684764	0.527	2590	tags=42%, list=21%, signal=53%
TONKS_TARGETS_OF_RUNX1_RUNX1T1_FUSION_HSC_DN	109	0.474945	1.91228	0	0.00673075	0.516	2345	tags=39%, list=19%, signal=47%
DAZARD_RESPONSE_TO_UV_SCC_UP	79	0.474482	1.83238	0	0.0154147	0.869	2041	tags=33%, list=17%, signal=39%
SEKI_INFLAMMATORY_RESPONSE_LPS_UP	32	0.474224	1.56776	0.0320513	0.0912245	1	2657	tags=50%, list=22%, signal=64%
AZARE_NEOPLASTIC_TRANSFORMATION_BY_STAT3_UP	58	0.473941	1.7286	0	0.0337472	0.999	3116	tags=50%, list=26%, signal=67%
NABA_MATRISOME	129	0.472925	1.95832	0	0.00400597	0.311	1427	tags=30%, list=12%, signal=34%
CHEMNITZ_RESPONSE_TO_PROSTAGLANDIN_E2_UP	108	0.472547	1.91385	0	0.00672246	0.508	1793	tags=31%, list=15%, signal=36%
FLECHNER_PBL_KIDNEY_TRANSPLANT_OK_VS_DONOR_DN	36	0.472159	1.56815	0.0188088	0.0911405	1	1937	tags=31%, list=16%, signal=36%
WANG_ESOPHAGUS_CANCER_VS_NORMAL_UP	63	0.471659	1.75454	0	0.0293112	0.996	951	tags=25%, list=8%, signal=27%
PID_AURORA_B_PATHWAY	31	0.471457	1.51593	0.0253566	0.114844	1	2627	tags=39%, list=22%, signal=49%
LEE_AGING_NEOCORTEX_DN	28	0.471356	1.49624	0.0327332	0.126369	1	1920	tags=29%, list=16%, signal=34%
PID_EPO_PATHWAY	24	0.470501	1.43777	0.048	0.163642	1	3490	tags=54%, list=29%, signal=76%
GNATENKO_PLATELET_SIGNATURE	34	0.47033	1.55975	0.0185759	0.0959629	1	3197	tags=50%, list=27%, signal=68%
SERVITJA_LIVER_HNF1A_TARGETS_UP	58	0.470236	1.74376	0.00143472	0.0307115	0.998	2437	tags=40%, list=20%, signal=49%
ROSS_AML_WITH_AML1_ETO_FUSION	38	0.470109	1.57475	0.015873	0.0888173	1	3072	tags=53%, list=25%, signal=70%
JI_RESPONSE_TO_FSH_DN	42	0.470106	1.60136	0.0150376	0.0777239	1	1389	tags=33%, list=12%, signal=38%
GAJATE_RESPONSE_TO_TRABECTEDIN_UP	34	0.470027	1.55774	0.0194175	0.0966952	1	1495	tags=32%, list=12%, signal=37%
FISCHER_G2_M_CELL_CYCLE	174	0.46993	2.02826	0	0.00187235	0.121	2854	tags=45%, list=24%, signal=58%
STAMBOLSKY_TARGETS_OF_MUTATED_TP53_DN	35	0.469883	1.57362	0.022187	0.0891441	1	1144	tags=34%, list=9%, signal=38%
PID_IL12_STAT4_PATHWAY	26	0.469857	1.45849	0.0349206	0.149242	1	1398	tags=27%, list=12%, signal=30%
NAKAMURA_CANCER_MICROENVIRONMENT_DN	33	0.468782	1.52876	0.037037	0.108315	1	1953	tags=30%, list=16%, signal=36%
MMS_MOUSE_LYMPH_HIGH_4HRS_UP	31	0.468288	1.49024	0.0334347	0.13025	1	2569	tags=35%, list=21%, signal=45%
REACTOME_MEIOTIC_RECOMBINATION	32	0.467688	1.51486	0.0301205	0.11529	1	2376	tags=34%, list=20%, signal=43%
WINTER_HYPOXIA_DN	36	0.467179	1.55886	0.0266458	0.0960229	1	2641	tags=31%, list=22%, signal=39%
KEGG_P53_SIGNALING_PATHWAY	54	0.464192	1.71858	0.00288184	0.0369893	1	991	tags=26%, list=8%, signal=28%
QI_PLASMACYTOMA_UP	165	0.46415	1.9942	0	0.00270644	0.195	2664	tags=41%, list=22%, signal=52%
LEIN_OLIGODENDROCYTE_MARKERS	38	0.463586	1.54776	0.0227642	0.100077	1	1964	tags=37%, list=16%, signal=44%
HOFFMANN_PRE_BI_TO_LARGE_PRE_BII_LYMPHOCYTE_DN	40	0.463509	1.57571	0.0175719	0.0885499	1	2002	tags=35%, list=17%, signal=42%
MOLENAAR_TARGETS_OF_CCND1_AND_CDK4_DN	37	0.463419	1.56005	0.0367412	0.0960207	1	3159	tags=51%, list=26%, signal=69%
DER_IFN_GAMMA_RESPONSE_UP	57	0.463262	1.67699	0.00594354	0.0483446	1	2873	tags=37%, list=24%, signal=48%
GOLDRATH_ANTIGEN_RESPONSE	255	0.463224	2.06127	0	0.0010832	0.062	2608	tags=40%, list=22%, signal=50%
KUMAR_AUTOPHAGY_NETWORK	39	0.462723	1.54479	0.0238853	0.101134	1	2543	tags=38%, list=21%, signal=49%
REACTOME_INTERLEUKIN_4_AND_INTERLEUKIN_13_SIGNALING	54	0.462655	1.6766	0.00458716	0.0483186	1	2616	tags=44%, list=22%, signal=56%
REACTOME_COSTIMULATION_BY_THE_CD28_FAMILY	62	0.46263	1.73972	0.00431035	0.0316197	0.998	2435	tags=37%, list=20%, signal=46%
SMID_BREAST_CANCER_BASAL_UP	229	0.461105	2.06313	0	0.00108263	0.061	2613	tags=43%, list=22%, signal=54%
LENAOUR_DENDRITIC_CELL_MATURATION_DN	73	0.461082	1.75418	0	0.0292824	0.996	2135	tags=37%, list=18%, signal=45%
REACTOME_MHC_CLASS_II_ANTIGEN_PRESENTATION	84	0.460887	1.80433	0	0.0193461	0.939	1953	tags=33%, list=16%, signal=39%
JACKSON_DNMT1_TARGETS_UP	47	0.460351	1.60579	0.00737463	0.0756005	1	867	tags=21%, list=7%, signal=23%
MOREIRA_RESPONSE_TO_TSA_UP	27	0.460226	1.43326	0.0485893	0.16733	1	3867	tags=52%, list=32%, signal=76%
GAL_LEUKEMIC_STEM_CELL_DN	105	0.459112	1.85075	0	0.0126652	0.798	2032	tags=35%, list=17%, signal=42%
DIAZ_CHRONIC_MEYLOGENOUS_LEUKEMIA_DN	58	0.45898	1.66952	0.00298063	0.0503929	1	2484	tags=43%, list=21%, signal=54%
KOBAYASHI_EGFR_SIGNALING_24HR_UP	53	0.458546	1.63907	0.00298507	0.0615981	1	2449	tags=47%, list=20%, signal=59%
REACTOME_METABOLISM_OF_NUCLEOTIDES	71	0.458438	1.74203	0	0.0310988	0.998	1622	tags=31%, list=13%, signal=36%
RHEIN_ALL_GLUCOCORTICOID_THERAPY_DN	295	0.457493	2.08196	0	0.000725812	0.038	3287	tags=43%, list=27%, signal=57%
BRACHAT_RESPONSE_TO_CAMPTOTHECIN_DN	35	0.457467	1.53515	0.0266458	0.105807	1	3488	tags=49%, list=29%, signal=68%
ALTEMEIER_RESPONSE_TO_LPS_WITH_MECHANICAL_VENTILATION	50	0.457351	1.5955	0.010479	0.0793034	1	2141	tags=46%, list=18%, signal=56%
HUANG_DASATINIB_RESISTANCE_UP	39	0.455843	1.53154	0.0278638	0.107071	1	2598	tags=44%, list=22%, signal=55%
GALINDO_IMMUNE_RESPONSE_TO_ENTEROTOXIN	48	0.455799	1.59045	0.0132939	0.0813492	1	1427	tags=35%, list=12%, signal=40%
SHEPARD_BMYB_TARGETS	41	0.454833	1.55625	0.0202177	0.0975514	1	2993	tags=54%, list=25%, signal=71%
SMID_BREAST_CANCER_RELAPSE_IN_BONE_DN	100	0.454418	1.82206	0	0.0170175	0.898	2613	tags=39%, list=22%, signal=49%
BOYLAN_MULTIPLE_MYELOMA_D_DN	50	0.454068	1.60335	0.0121029	0.0765839	1	2608	tags=42%, list=22%, signal=53%
GAVIN_FOXP3_TARGETS_CLUSTER_T4	75	0.453206	1.74776	0.00140252	0.0295563	0.997	2758	tags=39%, list=23%, signal=50%
TONKS_TARGETS_OF_RUNX1_RUNX1T1_FUSION_ERYTHROCYTE_UP	64	0.453181	1.684	0.00146843	0.0464478	1	1445	tags=30%, list=12%, signal=34%
EHLERS_ANEUPLOIDY_UP	31	0.452836	1.46936	0.0405844	0.14183	1	2017	tags=35%, list=17%, signal=42%
PID_E2F_PATHWAY	58	0.451982	1.65948	0.003003	0.0536372	1	1804	tags=29%, list=15%, signal=34%
MARSON_FOXP3_TARGETS_DN	43	0.451789	1.56508	0.0121029	0.093047	1	1712	tags=26%, list=14%, signal=30%
DER_IFN_BETA_RESPONSE_UP	86	0.451739	1.74826	0.001443	0.0296562	0.997	3210	tags=41%, list=27%, signal=55%
HELLER_HDAC_TARGETS_SILENCED_BY_METHYLATION_DN	188	0.450684	1.98153	0	0.00312043	0.23	2657	tags=39%, list=22%, signal=49%
VECCHI_GASTRIC_CANCER_ADVANCED_VS_EARLY_UP	33	0.450534	1.47266	0.0311475	0.140623	1	1954	tags=36%, list=16%, signal=43%
DIRMEIER_LMP1_RESPONSE_EARLY	49	0.450464	1.59376	0.00927357	0.0798311	1	2484	tags=47%, list=21%, signal=59%
VERHAAK_AML_WITH_NPM1_MUTATED_UP	60	0.450064	1.68052	0.00443131	0.047356	1	2442	tags=43%, list=20%, signal=54%
TONKS_TARGETS_OF_RUNX1_RUNX1T1_FUSION_MONOCYTE_DN	37	0.449898	1.49202	0.0331825	0.130051	1	2733	tags=35%, list=23%, signal=45%
KYNG_RESPONSE_TO_H2O2	50	0.449343	1.57524	0.00753012	0.0886467	1	2790	tags=40%, list=23%, signal=52%
BOSCO_ALLERGEN_INDUCED_TH2_ASSOCIATED_MODULE	111	0.448797	1.82098	0	0.0171332	0.902	2502	tags=41%, list=21%, signal=51%
KLEIN_PRIMARY_EFFUSION_LYMPHOMA_DN	37	0.44832	1.48938	0.040625	0.130337	1	3104	tags=54%, list=26%, signal=73%
BARIS_THYROID_CANCER_DN	41	0.448039	1.55168	0.0193861	0.0994845	1	3365	tags=49%, list=28%, signal=67%
SAMOLS_TARGETS_OF_KHSV_MIRNAS_DN	28	0.447717	1.42582	0.0493421	0.173162	1	471	tags=18%, list=4%, signal=19%
TONKS_TARGETS_OF_RUNX1_RUNX1T1_FUSION_HSC_UP	89	0.446547	1.73953	0	0.0313831	0.998	2321	tags=40%, list=19%, signal=50%
GUO_TARGETS_OF_IRS1_AND_IRS2	65	0.446547	1.67162	0	0.0500702	1	2135	tags=32%, list=18%, signal=39%
REACTOME_REGULATION_OF_INSULIN_LIKE_GROWTH_FACTOR_IGF_TRANSPORT_AND_UPTAKE_BY_INSULIN_LIKE_GROWTH_FACTOR_BINDING_PROTEINS_IGFBPS	34	0.445977	1.46223	0.0451807	0.146655	1	1363	tags=29%, list=11%, signal=33%
KEGG_PATHOGENIC_ESCHERICHIA_COLI_INFECTION	36	0.445504	1.46479	0.027027	0.144918	1	1543	tags=33%, list=13%, signal=38%
REACTOME_RHO_GTPASES_ACTIVATE_PKNS	37	0.445329	1.48485	0.0412698	0.132652	1	2689	tags=38%, list=22%, signal=49%
VECCHI_GASTRIC_CANCER_ADVANCED_VS_EARLY_DN	56	0.444895	1.64849	0.00284091	0.0575106	1	3727	tags=52%, list=31%, signal=75%
ZHOU_INFLAMMATORY_RESPONSE_LPS_UP	120	0.44437	1.83809	0	0.014398	0.845	2609	tags=43%, list=22%, signal=54%
JISON_SICKLE_CELL_DISEASE_UP	113	0.444303	1.8172	0	0.0173143	0.914	1445	tags=27%, list=12%, signal=30%
KIM_GERMINAL_CENTER_T_HELPER_UP	52	0.444079	1.609	0.00451807	0.0739179	1	1954	tags=31%, list=16%, signal=37%
MARKEY_RB1_ACUTE_LOF_DN	135	0.444078	1.86657	0	0.0105864	0.731	2285	tags=36%, list=19%, signal=44%
LU_IL4_SIGNALING	65	0.443816	1.65647	0.0057971	0.0543903	1	2702	tags=38%, list=22%, signal=49%
KOKKINAKIS_METHIONINE_DEPRIVATION_48HR_DN	45	0.442699	1.52104	0.0240601	0.11195	1	1975	tags=38%, list=16%, signal=45%
ZHAN_MULTIPLE_MYELOMA_HP_DN	34	0.442484	1.47592	0.0440729	0.138077	1	2034	tags=35%, list=17%, signal=42%
REACTOME_TP53_REGULATES_TRANSCRIPTION_OF_CELL_CYCLE_GENES	37	0.441358	1.48578	0.0472313	0.132903	1	2627	tags=35%, list=22%, signal=45%
YANG_BCL3_TARGETS_UP	158	0.441301	1.90145	0	0.00720615	0.559	2151	tags=40%, list=18%, signal=48%
SMID_BREAST_CANCER_LUMINAL_B_DN	177	0.441193	1.89979	0	0.00725403	0.57	1460	tags=30%, list=12%, signal=34%
REACTOME_IMMUNOREGULATORY_INTERACTIONS_BETWEEN_A_LYMPHOID_AND_A_NON_LYMPHOID_CELL	45	0.440981	1.54037	0.0136986	0.102902	1	2974	tags=42%, list=25%, signal=56%
THUM_SYSTOLIC_HEART_FAILURE_UP	252	0.440878	1.99147	0	0.00279284	0.204	1937	tags=31%, list=16%, signal=36%
MARSON_FOXP3_TARGETS_UP	54	0.440056	1.59848	0.00907716	0.0785594	1	2563	tags=41%, list=21%, signal=52%
FLORIO_NEOCORTEX_BASAL_RADIAL_GLIA_UP	67	0.43992	1.65941	0.00148588	0.0534829	1	2806	tags=52%, list=23%, signal=68%
BROCKE_APOPTOSIS_REVERSED_BY_IL6	107	0.439659	1.81144	0	0.01814	0.924	1520	tags=30%, list=13%, signal=34%
BASSO_CD40_SIGNALING_DN	36	0.43914	1.45899	0.0423601	0.149198	1	2501	tags=44%, list=21%, signal=56%
MISSIAGLIA_REGULATED_BY_METHYLATION_DN	101	0.438936	1.75047	0	0.029399	0.996	1821	tags=31%, list=15%, signal=36%
KEGG_RIG_I_LIKE_RECEPTOR_SIGNALING_PATHWAY	48	0.438723	1.55325	0.0162722	0.0987289	1	2121	tags=27%, list=18%, signal=33%
REACTOME_RESPONSE_TO_ELEVATED_PLATELET_CYTOSOLIC_CA2PLUS	61	0.438667	1.60937	0.00434153	0.0739493	1	1543	tags=26%, list=13%, signal=30%
MAHAJAN_RESPONSE_TO_IL1A_UP	34	0.438156	1.45322	0.0461538	0.153469	1	1482	tags=32%, list=12%, signal=37%
HU_ANGIOGENESIS_DN	32	0.43777	1.43031	0.0492611	0.169423	1	3690	tags=38%, list=31%, signal=54%
CHICAS_RB1_TARGETS_CONFLUENT	235	0.436682	1.94519	0	0.00480793	0.364	2036	tags=34%, list=17%, signal=40%
KIM_RESPONSE_TO_TSA_AND_DECITABINE_UP	38	0.435989	1.46936	0.0375	0.142088	1	2210	tags=37%, list=18%, signal=45%
KAMMINGA_EZH2_TARGETS	39	0.435784	1.45687	0.0474732	0.150496	1	1795	tags=31%, list=15%, signal=36%
JOHNSTONE_PARVB_TARGETS_1_DN	39	0.434103	1.4722	0.0338983	0.140589	1	3266	tags=46%, list=27%, signal=63%
GOTTWEIN_TARGETS_OF_KSHV_MIR_K12_11	48	0.433759	1.55104	0.00747384	0.0992588	1	1237	tags=27%, list=10%, signal=30%
SHETH_LIVER_CANCER_VS_TXNIP_LOSS_PAM2	88	0.433612	1.7136	0.00138696	0.0375373	1	3771	tags=53%, list=31%, signal=77%
LEE_EARLY_T_LYMPHOCYTE_DN	55	0.433094	1.57284	0.0149925	0.0894732	1	2981	tags=51%, list=25%, signal=67%
SASAKI_ADULT_T_CELL_LEUKEMIA	126	0.432092	1.79219	0	0.0217214	0.965	1953	tags=29%, list=16%, signal=34%
REACTOME_CLASS_A_1_RHODOPSIN_LIKE_RECEPTORS	45	0.432061	1.53065	0.0181818	0.107587	1	2339	tags=49%, list=19%, signal=60%
SCHUHMACHER_MYC_TARGETS_UP	70	0.43184	1.65752	0.00283688	0.054032	1	3199	tags=43%, list=27%, signal=58%
REACTOME_L1CAM_INTERACTIONS	47	0.431657	1.51658	0.0240964	0.114795	1	1661	tags=32%, list=14%, signal=37%
SMITH_TERT_TARGETS_DN	49	0.431136	1.54262	0.0106545	0.101981	1	2394	tags=31%, list=20%, signal=38%
RODRIGUES_THYROID_CARCINOMA_DN	42	0.431036	1.48363	0.0271084	0.133092	1	1837	tags=33%, list=15%, signal=39%
TENEDINI_MEGAKARYOCYTE_MARKERS	36	0.429682	1.42161	0.0478395	0.177171	1	2484	tags=33%, list=21%, signal=42%
SERVITJA_LIVER_HNF1A_TARGETS_DN	40	0.427974	1.47272	0.030303	0.14082	1	1518	tags=33%, list=13%, signal=37%
RIGGI_EWING_SARCOMA_PROGENITOR_UP	144	0.427479	1.78615	0	0.0230672	0.973	3415	tags=49%, list=28%, signal=68%
LENAOUR_DENDRITIC_CELL_MATURATION_UP	53	0.427139	1.54337	0.0198473	0.101644	1	2345	tags=40%, list=19%, signal=49%
GRAESSMANN_RESPONSE_TO_MC_AND_SERUM_DEPRIVATION_UP	106	0.424955	1.71765	0.00137741	0.0368452	1	2233	tags=34%, list=19%, signal=41%
BENPORATH_PROLIFERATION	124	0.423937	1.75174	0	0.0293282	0.996	3159	tags=39%, list=26%, signal=52%
REACTOME_GPCR_LIGAND_BINDING	57	0.423648	1.53497	0.010355	0.105459	1	2382	tags=49%, list=20%, signal=61%
BURTON_ADIPOGENESIS_3	80	0.421813	1.63586	0.00431655	0.0628385	1	2438	tags=40%, list=20%, signal=50%
ELVIDGE_HIF1A_TARGETS_DN	47	0.421095	1.47637	0.0302572	0.138096	1	2210	tags=34%, list=18%, signal=42%
FOSTER_KDM1A_TARGETS_UP	59	0.420579	1.54822	0.0177515	0.0999134	1	1159	tags=25%, list=10%, signal=28%
BHATTACHARYA_EMBRYONIC_STEM_CELL	53	0.419739	1.53497	0.0166415	0.105699	1	2993	tags=40%, list=25%, signal=52%
PANGAS_TUMOR_SUPPRESSION_BY_SMAD1_AND_SMAD5_UP	57	0.419287	1.52429	0.00894188	0.110304	1	2447	tags=37%, list=20%, signal=46%
MIKKELSEN_IPS_LCP_WITH_H3K4ME3	59	0.418909	1.52871	0.0085592	0.108142	1	1933	tags=32%, list=16%, signal=38%
HELLER_HDAC_TARGETS_DN	194	0.418455	1.83896	0	0.0144699	0.842	2731	tags=36%, list=23%, signal=45%
TARTE_PLASMA_CELL_VS_B_LYMPHOCYTE_UP	69	0.417844	1.56824	0.00588235	0.0912848	1	2395	tags=32%, list=20%, signal=40%
SANA_RESPONSE_TO_IFNG_DN	61	0.417478	1.55938	0.0113475	0.0960613	1	2689	tags=33%, list=22%, signal=42%
HIRSCH_CELLULAR_TRANSFORMATION_SIGNATURE_DN	63	0.416194	1.56836	0.0128023	0.0914153	1	2981	tags=40%, list=25%, signal=52%
MIYAGAWA_TARGETS_OF_EWSR1_ETS_FUSIONS_UP	120	0.414847	1.69831	0	0.0421466	1	2913	tags=48%, list=24%, signal=62%
MORI_SMALL_PRE_BII_LYMPHOCYTE_UP	47	0.4139	1.48553	0.0255639	0.132653	1	2447	tags=26%, list=20%, signal=32%
DAVICIONI_MOLECULAR_ARMS_VS_ERMS_DN	66	0.41386	1.5708	0.0131387	0.0900214	1	3165	tags=48%, list=26%, signal=65%
SMID_BREAST_CANCER_ERBB2_UP	53	0.412515	1.46786	0.0272727	0.142135	1	1336	tags=21%, list=11%, signal=23%
ZHOU_CELL_CYCLE_GENES_IN_IR_RESPONSE_24HR	94	0.412193	1.63717	0.00417246	0.0624982	1	1920	tags=32%, list=16%, signal=38%
ZHONG_SECRETOME_OF_LUNG_CANCER_AND_MACROPHAGE	48	0.412171	1.44944	0.0368664	0.15621	1	1682	tags=27%, list=14%, signal=31%
HOFFMANN_LARGE_TO_SMALL_PRE_BII_LYMPHOCYTE_UP	119	0.411171	1.66837	0.00131926	0.0507679	1	2962	tags=43%, list=25%, signal=56%
SAKAI_TUMOR_INFILTRATING_MONOCYTES_DN	69	0.410776	1.54718	0.0230548	0.0998558	1	2671	tags=35%, list=22%, signal=44%
KONG_E2F3_TARGETS	75	0.410726	1.55621	0.0142248	0.0973437	1	3133	tags=47%, list=26%, signal=63%
VANTVEER_BREAST_CANCER_ESR1_DN	155	0.409435	1.75375	0	0.029336	0.996	2642	tags=35%, list=22%, signal=44%
REACTOME_PROTEIN_FOLDING	62	0.40845	1.51185	0.0168196	0.117407	1	2438	tags=32%, list=20%, signal=40%
HELLER_SILENCED_BY_METHYLATION_DN	58	0.408214	1.50906	0.0171429	0.118233	1	2431	tags=34%, list=20%, signal=43%
ODONNELL_TARGETS_OF_MYC_AND_TFRC_UP	60	0.407756	1.50096	0.013373	0.123554	1	2746	tags=50%, list=23%, signal=64%
BENPORATH_PRC2_TARGETS	62	0.406555	1.52452	0.0177515	0.110355	1	1982	tags=32%, list=16%, signal=38%
BERTUCCI_MEDULLARY_VS_DUCTAL_BREAST_CANCER_UP	162	0.405776	1.74801	0	0.0296375	0.997	2547	tags=34%, list=21%, signal=42%
ZHONG_RESPONSE_TO_AZACITIDINE_AND_TSA_DN	56	0.405599	1.47896	0.0298063	0.136757	1	1872	tags=30%, list=16%, signal=36%
WHITFIELD_CELL_CYCLE_G2_M	148	0.40523	1.71694	0	0.0366587	1	2854	tags=41%, list=24%, signal=52%
PID_P73PATHWAY	55	0.404362	1.44951	0.0267062	0.156406	1	2657	tags=33%, list=22%, signal=42%
FERRANDO_T_ALL_WITH_MLL_ENL_FUSION_DN	70	0.404121	1.53634	0.00733138	0.105213	1	3018	tags=39%, list=25%, signal=51%
PLASARI_TGFB1_TARGETS_10HR_UP	71	0.403458	1.53465	0.0201729	0.105239	1	2456	tags=41%, list=20%, signal=51%
CHIARADONNA_NEOPLASTIC_TRANSFORMATION_KRAS_DN	70	0.403121	1.51253	0.0146413	0.117014	1	2366	tags=31%, list=20%, signal=39%
MIKKELSEN_MCV6_LCP_WITH_H3K4ME3	68	0.402988	1.50604	0.0184397	0.120071	1	1933	tags=31%, list=16%, signal=37%
GROSS_HYPOXIA_VIA_ELK3_AND_HIF1A_UP	88	0.402872	1.57808	0.00418994	0.0878672	1	2113	tags=25%, list=18%, signal=30%
SANSOM_APC_TARGETS_UP	71	0.402867	1.51626	0.0188679	0.114785	1	3246	tags=49%, list=27%, signal=67%
REACTOME_SIGNALING_BY_VEGF	69	0.401499	1.52285	0.0070922	0.111072	1	1543	tags=28%, list=13%, signal=31%
CHAUHAN_RESPONSE_TO_METHOXYESTRADIOL_DN	90	0.401187	1.57424	0.00138122	0.0889486	1	3203	tags=42%, list=27%, signal=57%
REACTOME_INTERFERON_SIGNALING	150	0.40115	1.70526	0	0.0404906	1	2210	tags=31%, list=18%, signal=38%
MIYAGAWA_TARGETS_OF_EWSR1_ETS_FUSIONS_DN	70	0.400869	1.51268	0.0144509	0.117092	1	1295	tags=26%, list=11%, signal=29%
LEE_AGING_NEOCORTEX_UP	51	0.399791	1.44462	0.0218978	0.159438	1	3026	tags=35%, list=25%, signal=47%
IGLESIAS_E2F_TARGETS_UP	72	0.399486	1.51081	0.0157368	0.11786	1	1662	tags=28%, list=14%, signal=32%
MISSIAGLIA_REGULATED_BY_METHYLATION_UP	76	0.399091	1.53482	0.0168776	0.105362	1	2895	tags=43%, list=24%, signal=57%
GOLDRATH_HOMEOSTATIC_PROLIFERATION	120	0.398459	1.64944	0.00133333	0.0571951	1	3180	tags=38%, list=26%, signal=52%
PID_IL2_1PATHWAY	49	0.397505	1.41747	0.0471125	0.181247	1	745	tags=16%, list=6%, signal=17%
LAIHO_COLORECTAL_CANCER_SERRATED_UP	85	0.396891	1.55599	0.0125	0.097326	1	2565	tags=29%, list=21%, signal=37%
CHIARADONNA_NEOPLASTIC_TRANSFORMATION_KRAS_UP	84	0.396854	1.54145	0.0128571	0.102242	1	1841	tags=31%, list=15%, signal=36%
SONG_TARGETS_OF_IE86_CMV_PROTEIN	49	0.396083	1.42264	0.0307918	0.176174	1	1647	tags=27%, list=14%, signal=31%
FULCHER_INFLAMMATORY_RESPONSE_LECTIN_VS_LPS_DN	291	0.396004	1.81322	0	0.0178233	0.923	2442	tags=36%, list=20%, signal=44%
PASINI_SUZ12_TARGETS_DN	156	0.394558	1.67969	0	0.0475034	1	2608	tags=40%, list=22%, signal=50%
SANSOM_APC_TARGETS_DN	176	0.392981	1.7022	0	0.0412968	1	1975	tags=28%, list=16%, signal=33%
FARMER_BREAST_CANCER_APOCRINE_VS_BASAL	192	0.392355	1.73363	0	0.0329163	0.998	2460	tags=35%, list=20%, signal=43%
VANTVEER_BREAST_CANCER_METASTASIS_DN	85	0.392168	1.52907	0.0151099	0.108286	1	1507	tags=24%, list=12%, signal=27%
MEISSNER_BRAIN_HCP_WITH_H3K4ME3_AND_H3K27ME3	239	0.391396	1.75248	0	0.0292326	0.996	2616	tags=36%, list=22%, signal=45%
AFFAR_YY1_TARGETS_DN	131	0.391139	1.62822	0.00133156	0.0656226	1	2028	tags=27%, list=17%, signal=32%
GROSS_HYPOXIA_VIA_HIF1A_UP	63	0.390897	1.44963	0.0210843	0.156541	1	1925	tags=29%, list=16%, signal=34%
GROSS_HYPOXIA_VIA_ELK3_DN	87	0.390702	1.53021	0.0170455	0.107744	1	3190	tags=38%, list=26%, signal=51%
DELYS_THYROID_CANCER_UP	176	0.39067	1.68832	0	0.0454147	1	3117	tags=44%, list=26%, signal=58%
DURAND_STROMA_S_UP	91	0.390342	1.55162	0.00704225	0.0992791	1	1969	tags=37%, list=16%, signal=44%
SMID_BREAST_CANCER_NORMAL_LIKE_UP	222	0.390138	1.73564	0	0.032501	0.998	2345	tags=32%, list=19%, signal=40%
SATO_SILENCED_BY_METHYLATION_IN_PANCREATIC_CANCER_1	128	0.389226	1.62056	0.00269179	0.0684558	1	2577	tags=40%, list=21%, signal=50%
KIM_WT1_TARGETS_UP	119	0.388088	1.6	0.00265604	0.0781539	1	2052	tags=30%, list=17%, signal=36%
LEE_RECENT_THYMIC_EMIGRANT	168	0.387669	1.64403	0	0.0592617	1	2450	tags=32%, list=20%, signal=39%
VECCHI_GASTRIC_CANCER_EARLY_UP	274	0.387444	1.75768	0	0.0285301	0.995	3010	tags=37%, list=25%, signal=48%
NIKOLSKY_BREAST_CANCER_8Q12_Q22_AMPLICON	62	0.386476	1.41594	0.042029	0.181906	1	2790	tags=42%, list=23%, signal=54%
BOQUEST_STEM_CELL_CULTURED_VS_FRESH_UP	176	0.38611	1.67085	0.00123916	0.0501593	1	2187	tags=36%, list=18%, signal=43%
LANDIS_ERBB2_BREAST_TUMORS_324_UP	94	0.385848	1.54772	0.00554785	0.0998755	1	1086	tags=20%, list=9%, signal=22%
CHICAS_RB1_TARGETS_GROWING	128	0.383652	1.61422	0.00135501	0.0717055	1	2450	tags=31%, list=20%, signal=39%
LI_INDUCED_T_TO_NATURAL_KILLER_DN	88	0.383642	1.50588	0.0085592	0.11974	1	2568	tags=36%, list=21%, signal=46%
MARTINEZ_RESPONSE_TO_TRABECTEDIN_UP	57	0.382838	1.38236	0.048855	0.211301	1	1293	tags=23%, list=11%, signal=25%
SARRIO_EPITHELIAL_MESENCHYMAL_TRANSITION_UP	122	0.382789	1.58603	0.00536913	0.0831179	1	1709	tags=25%, list=14%, signal=29%
LINDGREN_BLADDER_CANCER_CLUSTER_2B	187	0.381751	1.68244	0	0.0467434	1	1968	tags=32%, list=16%, signal=37%
LIM_MAMMARY_STEM_CELL_UP	125	0.381397	1.58037	0	0.0867465	1	2657	tags=40%, list=22%, signal=51%
WONG_ADULT_TISSUE_STEM_MODULE	288	0.381271	1.75294	0	0.0293994	0.996	2647	tags=37%, list=22%, signal=46%
YAMAZAKI_TCEB3_TARGETS_UP	75	0.381036	1.4684	0.0226629	0.142111	1	2786	tags=39%, list=23%, signal=50%
SHEPARD_BMYB_MORPHOLINO_DN	98	0.380953	1.50658	0.00811908	0.120041	1	1310	tags=22%, list=11%, signal=25%
COLINA_TARGETS_OF_4EBP1_AND_4EBP2	209	0.380655	1.66808	0	0.0505231	1	2547	tags=33%, list=21%, signal=42%
JAATINEN_HEMATOPOIETIC_STEM_CELL_DN	112	0.380073	1.54973	0.00922266	0.0998826	1	2272	tags=34%, list=19%, signal=41%
BIDUS_METASTASIS_UP	177	0.379315	1.63716	0.00129366	0.0622989	1	2450	tags=28%, list=20%, signal=34%
REACTOME_DDX58_IFIH1_MEDIATED_INDUCTION_OF_INTERFERON_ALPHA_BETA	60	0.378843	1.37861	0.0368732	0.214394	1	1144	tags=20%, list=9%, signal=22%
WIERENGA_STAT5A_TARGETS_UP	94	0.378764	1.49574	0.0125523	0.126611	1	2028	tags=32%, list=17%, signal=38%
WINNEPENNINCKX_MELANOMA_METASTASIS_UP	134	0.378377	1.57703	0.00134048	0.0879152	1	1953	tags=25%, list=16%, signal=30%
YAGI_AML_FAB_MARKERS	115	0.378051	1.54207	0	0.102169	1	2980	tags=37%, list=25%, signal=48%
HAHTOLA_MYCOSIS_FUNGOIDES_CD4_DN	108	0.37737	1.51693	0.00692521	0.114674	1	2590	tags=32%, list=21%, signal=41%
SCHAEFFER_PROSTATE_DEVELOPMENT_48HR_UP	159	0.377141	1.58895	0.00262467	0.0818886	1	2624	tags=38%, list=22%, signal=48%
REACTOME_TNFR2_NON_CANONICAL_NF_KB_PATHWAY	80	0.377011	1.46436	0.0310296	0.145125	1	1082	tags=18%, list=9%, signal=19%
CAIRO_HEPATOBLASTOMA_DN	97	0.376922	1.4895	0.0110041	0.130462	1	1320	tags=23%, list=11%, signal=25%
DANG_REGULATED_BY_MYC_DN	149	0.375443	1.60957	0	0.0740181	1	1925	tags=30%, list=16%, signal=35%
LU_EZH2_TARGETS_UP	186	0.374474	1.63333	0	0.0638275	1	2547	tags=34%, list=21%, signal=42%
HOSHIDA_LIVER_CANCER_SUBCLASS_S1	164	0.374439	1.59898	0	0.0786772	1	1933	tags=27%, list=16%, signal=32%
HUTTMANN_B_CLL_POOR_SURVIVAL_UP	166	0.372926	1.59857	0.00127226	0.0787452	1	2502	tags=35%, list=21%, signal=43%
BROWN_MYELOID_CELL_DEVELOPMENT_UP	78	0.37247	1.42982	0.0215517	0.169749	1	3277	tags=42%, list=27%, signal=58%
HUANG_GATA2_TARGETS_UP	99	0.371568	1.49884	0.00684931	0.125079	1	3479	tags=46%, list=29%, signal=65%
BENPORATH_ES_WITH_H3K27ME3	174	0.371085	1.6105	0	0.0736243	1	2521	tags=32%, list=21%, signal=39%
VERHAAK_GLIOBLASTOMA_MESENCHYMAL	127	0.370813	1.52791	0.0077821	0.108354	1	3172	tags=46%, list=26%, signal=61%
FERRANDO_T_ALL_WITH_MLL_ENL_FUSION_UP	68	0.370699	1.39884	0.0471976	0.197357	1	2007	tags=26%, list=17%, signal=32%
BUYTAERT_PHOTODYNAMIC_THERAPY_STRESS_DN	447	0.370554	1.7455	0	0.0302636	0.998	2876	tags=33%, list=24%, signal=42%
KARLSSON_TGFB1_TARGETS_UP	96	0.370441	1.47633	0.00710227	0.137896	1	2002	tags=23%, list=17%, signal=27%
TORCHIA_TARGETS_OF_EWSR1_FLI1_FUSION_DN	178	0.36934	1.59795	0	0.0786635	1	2635	tags=33%, list=22%, signal=42%
TOOKER_GEMCITABINE_RESISTANCE_DN	93	0.369163	1.4579	0.018705	0.149671	1	1515	tags=20%, list=13%, signal=23%
WANG_RESPONSE_TO_GSK3_INHIBITOR_SB216763_DN	251	0.368513	1.65925	0	0.0533678	1	2603	tags=34%, list=22%, signal=42%
GOZGIT_ESR1_TARGETS_DN	301	0.368171	1.67812	0	0.0479964	1	2747	tags=35%, list=23%, signal=44%
TARTE_PLASMA_CELL_VS_PLASMABLAST_DN	277	0.36804	1.66982	0	0.0504817	1	3287	tags=36%, list=27%, signal=48%
GROSS_HYPOXIA_VIA_ELK3_UP	141	0.367942	1.54741	0.00268097	0.0999081	1	1929	tags=28%, list=16%, signal=33%
JOHNSTONE_PARVB_TARGETS_3_UP	284	0.367721	1.67605	0	0.0482137	1	2403	tags=31%, list=20%, signal=38%
DANG_MYC_TARGETS_UP	113	0.367712	1.50449	0.00810811	0.120576	1	975	tags=16%, list=8%, signal=17%
RAY_TUMORIGENESIS_BY_ERBB2_CDC25A_UP	83	0.36626	1.43717	0.0181311	0.164116	1	3026	tags=40%, list=25%, signal=53%
SEIDEN_ONCOGENESIS_BY_MET	72	0.366242	1.39738	0.0447977	0.198134	1	3097	tags=33%, list=26%, signal=45%
BURTON_ADIPOGENESIS_6	118	0.365065	1.49838	0.00411523	0.125228	1	2248	tags=25%, list=19%, signal=30%
GRUETZMANN_PANCREATIC_CANCER_UP	229	0.364326	1.64415	0.00127226	0.0593843	1	3109	tags=36%, list=26%, signal=48%
MASSARWEH_TAMOXIFEN_RESISTANCE_DN	108	0.362189	1.47542	0.0159151	0.138389	1	2563	tags=32%, list=21%, signal=41%
WHITFIELD_CELL_CYCLE_S	103	0.361899	1.46194	0.0137363	0.146687	1	1653	tags=21%, list=14%, signal=25%
MARKEY_RB1_ACUTE_LOF_UP	180	0.36151	1.56922	0	0.0910052	1	1821	tags=26%, list=15%, signal=30%
GAUSSMANN_MLL_AF4_FUSION_TARGETS_F_UP	69	0.361383	1.36853	0.0468966	0.221385	1	1684	tags=28%, list=14%, signal=32%
BILD_HRAS_ONCOGENIC_SIGNATURE	129	0.36106	1.49717	0.00933333	0.125917	1	1954	tags=32%, list=16%, signal=38%
ODONNELL_TFRC_TARGETS_UP	156	0.360364	1.54469	0.00395257	0.100998	1	1638	tags=28%, list=14%, signal=31%
FARMER_BREAST_CANCER_BASAL_VS_LULMINAL	176	0.360058	1.55127	0.00124378	0.0993328	1	2970	tags=35%, list=25%, signal=46%
SHEDDEN_LUNG_CANCER_POOR_SURVIVAL_A6	326	0.358783	1.65527	0	0.0546936	1	3287	tags=38%, list=27%, signal=51%
ZHANG_RESPONSE_TO_IKK_INHIBITOR_AND_TNF_UP	119	0.357989	1.46047	0.0118577	0.148072	1	2347	tags=34%, list=19%, signal=42%
PEDRIOLI_MIR31_TARGETS_DN	164	0.357838	1.54858	0.00380228	0.0998084	1	2529	tags=34%, list=21%, signal=42%
GREGORY_SYNTHETIC_LETHAL_WITH_IMATINIB	92	0.35776	1.43147	0.0282885	0.168625	1	1375	tags=21%, list=11%, signal=23%
ONDER_CDH1_TARGETS_2_DN	126	0.357598	1.4848	0.00808625	0.132433	1	1509	tags=24%, list=13%, signal=27%
BASSO_B_LYMPHOCYTE_NETWORK	129	0.356981	1.48509	0.00671141	0.132904	1	3558	tags=47%, list=29%, signal=65%
LINDGREN_BLADDER_CANCER_CLUSTER_3_UP	246	0.356551	1.59654	0	0.0790226	1	3109	tags=35%, list=26%, signal=46%
RIGGINS_TAMOXIFEN_RESISTANCE_DN	129	0.355426	1.47245	0.00651042	0.140583	1	1972	tags=23%, list=16%, signal=28%
DAVICIONI_TARGETS_OF_PAX_FOXO1_FUSIONS_UP	119	0.355315	1.45378	0.0107817	0.153403	1	2616	tags=37%, list=22%, signal=47%
RODRIGUES_DCC_TARGETS_DN	88	0.354861	1.39496	0.0247934	0.199902	1	2191	tags=31%, list=18%, signal=37%
WANG_SMARCE1_TARGETS_DN	234	0.354498	1.59703	0	0.0791442	1	3589	tags=42%, list=30%, signal=58%
ZWANG_EGF_INTERVAL_DN	105	0.354422	1.42503	0.0210379	0.173849	1	1942	tags=27%, list=16%, signal=32%
GRAESSMANN_APOPTOSIS_BY_SERUM_DEPRIVATION_UP	307	0.354138	1.62569	0	0.0666867	1	2399	tags=29%, list=20%, signal=35%
JAATINEN_HEMATOPOIETIC_STEM_CELL_UP	126	0.353923	1.46384	0.0106101	0.145147	1	2787	tags=35%, list=23%, signal=45%
ROZANOV_MMP14_TARGETS_UP	113	0.352697	1.44597	0.0174966	0.158733	1	2274	tags=29%, list=19%, signal=36%
VANTVEER_BREAST_CANCER_ESR1_UP	113	0.352527	1.42602	0.0228188	0.173195	1	1687	tags=23%, list=14%, signal=26%
PEDERSEN_METASTASIS_BY_ERBB2_ISOFORM_7	206	0.352122	1.55409	0.002442	0.0985033	1	2625	tags=31%, list=22%, signal=38%
FARMER_BREAST_CANCER_APOCRINE_VS_LUMINAL	177	0.35056	1.534	0.00256082	0.105579	1	3173	tags=36%, list=26%, signal=48%
LIM_MAMMARY_STEM_CELL_DN	240	0.350094	1.57231	0	0.0896391	1	2256	tags=28%, list=19%, signal=33%
PLASARI_TGFB1_TARGETS_10HR_DN	92	0.349439	1.38451	0.032967	0.208791	1	1977	tags=28%, list=16%, signal=34%
KARLSSON_TGFB1_TARGETS_DN	131	0.349068	1.47137	0.00397351	0.140958	1	2089	tags=27%, list=17%, signal=32%
MATTIOLI_MGUS_VS_PCL	87	0.347899	1.37386	0.0463768	0.218174	1	1621	tags=21%, list=13%, signal=24%
RODWELL_AGING_KIDNEY_UP	284	0.347134	1.59217	0	0.080688	1	2399	tags=30%, list=20%, signal=37%
KINSEY_TARGETS_OF_EWSR1_FLII_FUSION_DN	159	0.347127	1.4904	0.00769231	0.130599	1	3660	tags=48%, list=30%, signal=68%
WELCSH_BRCA1_TARGETS_UP	159	0.344812	1.46758	0.0118421	0.142176	1	2342	tags=25%, list=19%, signal=31%
REN_ALVEOLAR_RHABDOMYOSARCOMA_DN	262	0.344259	1.5502	0	0.0997574	1	2632	tags=32%, list=22%, signal=41%
ALONSO_METASTASIS_UP	138	0.343263	1.4365	0.00942126	0.164664	1	3433	tags=34%, list=28%, signal=47%
DUTERTRE_ESTRADIOL_RESPONSE_24HR_UP	207	0.342455	1.51781	0.00121655	0.114335	1	2923	tags=34%, list=24%, signal=44%
SENGUPTA_NASOPHARYNGEAL_CARCINOMA_UP	188	0.342443	1.48663	0.00391134	0.132313	1	1620	tags=22%, list=13%, signal=25%
DOANE_RESPONSE_TO_ANDROGEN_DN	144	0.341953	1.43942	0.0039267	0.162506	1	2988	tags=35%, list=25%, signal=47%
FUJII_YBX1_TARGETS_DN	149	0.341611	1.45851	0.00659631	0.149487	1	1992	tags=26%, list=17%, signal=30%
LEE_DIFFERENTIATING_T_LYMPHOCYTE	184	0.339729	1.4857	0.0078637	0.132751	1	2677	tags=28%, list=22%, signal=35%
WHITFIELD_CELL_CYCLE_G1_S	100	0.339391	1.36033	0.0421941	0.225697	1	2975	tags=32%, list=25%, signal=42%
CHARAFE_BREAST_CANCER_LUMINAL_VS_MESENCHYMAL_DN	225	0.337988	1.52706	0.00124844	0.108572	1	2910	tags=35%, list=24%, signal=45%
CUI_TCF21_TARGETS_2_UP	185	0.337798	1.48347	0.00254453	0.133006	1	1810	tags=24%, list=15%, signal=28%
PODAR_RESPONSE_TO_ADAPHOSTIN_UP	113	0.337364	1.39014	0.0329218	0.20374	1	2653	tags=37%, list=22%, signal=47%
ZHOU_INFLAMMATORY_RESPONSE_FIMA_UP	151	0.334667	1.41664	0.0105263	0.181654	1	2590	tags=32%, list=21%, signal=40%
HORIUCHI_WTAP_TARGETS_UP	174	0.3345	1.44928	0.00505051	0.155839	1	2121	tags=32%, list=18%, signal=38%
SWEET_LUNG_CANCER_KRAS_UP	279	0.334442	1.52738	0	0.108557	1	2616	tags=28%, list=22%, signal=35%
FEVR_CTNNB1_TARGETS_UP	352	0.33275	1.54161	0	0.102317	1	2360	tags=30%, list=20%, signal=36%
BENPORATH_CYCLING_GENES	471	0.332587	1.57868	0	0.0876618	1	2854	tags=31%, list=24%, signal=39%
FERREIRA_EWINGS_SARCOMA_UNSTABLE_VS_STABLE_UP	118	0.332444	1.35916	0.0416667	0.227089	1	1793	tags=19%, list=15%, signal=23%
MARTENS_TRETINOIN_RESPONSE_UP	113	0.331938	1.35271	0.0405028	0.233398	1	1670	tags=23%, list=14%, signal=26%
MEISSNER_NPC_HCP_WITH_H3K4ME2	121	0.33188	1.36944	0.0359521	0.221306	1	2747	tags=32%, list=23%, signal=41%
PHONG_TNF_RESPONSE_NOT_VIA_P38	197	0.331628	1.44993	0.00502513	0.156463	1	2558	tags=33%, list=21%, signal=41%
PUJANA_XPRSS_INT_NETWORK	156	0.331049	1.43944	0.0156454	0.162755	1	1951	tags=23%, list=16%, signal=27%
RUTELLA_RESPONSE_TO_HGF_UP	248	0.33081	1.48983	0.00615764	0.130414	1	2689	tags=33%, list=22%, signal=42%
SENESE_HDAC1_AND_HDAC2_TARGETS_UP	125	0.32957	1.37186	0.036193	0.220061	1	2639	tags=30%, list=22%, signal=39%
REACTOME_PLATELET_ACTIVATION_SIGNALING_AND_AGGREGATION	128	0.328073	1.37036	0.0331034	0.220665	1	2361	tags=29%, list=20%, signal=36%
OSMAN_BLADDER_CANCER_UP	353	0.327743	1.51829	0	0.114142	1	2704	tags=27%, list=22%, signal=34%
SENESE_HDAC1_TARGETS_UP	304	0.327618	1.49641	0	0.126445	1	2657	tags=31%, list=22%, signal=38%
RUTELLA_RESPONSE_TO_HGF_VS_CSF2RB_AND_IL4_UP	242	0.326781	1.45418	0.00488401	0.153229	1	2067	tags=27%, list=17%, signal=32%
BENPORATH_SUZ12_TARGETS	149	0.326512	1.39293	0.0157068	0.201479	1	1684	tags=26%, list=14%, signal=30%
CREIGHTON_ENDOCRINE_THERAPY_RESISTANCE_1	314	0.325086	1.50175	0	0.123001	1	2606	tags=27%, list=22%, signal=34%
YAGI_AML_WITH_T_8_21_TRANSLOCATION	249	0.324956	1.46414	0	0.145091	1	2317	tags=26%, list=19%, signal=32%
SHETH_LIVER_CANCER_VS_TXNIP_LOSS_PAM4	126	0.323771	1.33807	0.0352941	0.251743	1	1923	tags=26%, list=16%, signal=31%
FOSTER_TOLERANT_MACROPHAGE_DN	248	0.321921	1.43997	0.00484848	0.162375	1	2657	tags=31%, list=22%, signal=40%
BLUM_RESPONSE_TO_SALIRASIB_DN	245	0.321735	1.43892	0.00852619	0.162564	1	2080	tags=25%, list=17%, signal=29%
LEE_BMP2_TARGETS_UP	305	0.319228	1.46938	0.00118624	0.142324	1	2547	tags=30%, list=21%, signal=37%
BERENJENO_TRANSFORMED_BY_RHOA_DN	231	0.318285	1.41323	0.00609013	0.183889	1	3125	tags=39%, list=26%, signal=51%
YAO_TEMPORAL_RESPONSE_TO_PROGESTERONE_CLUSTER_13	143	0.317296	1.33342	0.029987	0.25522	1	3122	tags=28%, list=26%, signal=37%
NAKAMURA_TUMOR_ZONE_PERIPHERAL_VS_CENTRAL_UP	175	0.317101	1.37239	0.0233161	0.219643	1	2669	tags=27%, list=22%, signal=34%
DAZARD_RESPONSE_TO_UV_NHEK_UP	134	0.316506	1.30838	0.0427807	0.283332	1	1703	tags=25%, list=14%, signal=28%
HIRSCH_CELLULAR_TRANSFORMATION_SIGNATURE_UP	169	0.31591	1.35382	0.0204082	0.232606	1	2577	tags=27%, list=21%, signal=34%
RUTELLA_RESPONSE_TO_CSF2RB_AND_IL4_UP	208	0.315842	1.3931	0.0147965	0.201533	1	2815	tags=30%, list=23%, signal=39%
BASAKI_YBX1_TARGETS_DN	229	0.313931	1.40146	0.0157385	0.195328	1	2376	tags=28%, list=20%, signal=34%
KUMAR_TARGETS_OF_MLL_AF9_FUSION	220	0.313354	1.38911	0.0121803	0.203924	1	2496	tags=27%, list=21%, signal=34%
DEURIG_T_CELL_PROLYMPHOCYTIC_LEUKEMIA_UP	180	0.312479	1.33914	0.0399002	0.250396	1	2432	tags=29%, list=20%, signal=36%
ZWANG_TRANSIENTLY_UP_BY_2ND_EGF_PULSE_ONLY	349	0.312311	1.43373	0.0023015	0.167304	1	2091	tags=25%, list=17%, signal=29%
RUTELLA_RESPONSE_TO_CSF2RB_AND_IL4_DN	201	0.311679	1.38557	0.0198511	0.207689	1	1757	tags=25%, list=15%, signal=29%
BASAKI_YBX1_TARGETS_UP	187	0.311654	1.35305	0.0292249	0.233486	1	2494	tags=29%, list=21%, signal=37%
SMID_BREAST_CANCER_BASAL_DN	245	0.310046	1.39092	0.00738916	0.203623	1	2282	tags=25%, list=19%, signal=31%
MATSUDA_NATURAL_KILLER_DIFFERENTIATION	260	0.309746	1.39884	0.0108173	0.197067	1	2469	tags=30%, list=20%, signal=36%
NUYTTEN_NIPP1_TARGETS_UP	464	0.30896	1.47055	0	0.14135	1	2751	tags=32%, list=23%, signal=39%
LINDGREN_BLADDER_CANCER_CLUSTER_1_DN	236	0.308131	1.3899	0.00985222	0.203469	1	3115	tags=34%, list=26%, signal=45%
MIKKELSEN_ES_ICP_WITH_H3K4ME3	297	0.306432	1.39637	0.00593824	0.198957	1	2454	tags=26%, list=20%, signal=32%
CHARAFE_BREAST_CANCER_LUMINAL_VS_BASAL_DN	230	0.30362	1.35566	0.0231425	0.232038	1	2657	tags=32%, list=22%, signal=40%
HELLER_HDAC_TARGETS_SILENCED_BY_METHYLATION_UP	179	0.303189	1.31491	0.045283	0.276182	1	2568	tags=33%, list=21%, signal=41%
RICKMAN_TUMOR_DIFFERENTIATED_WELL_VS_POORLY_DN	215	0.302308	1.33777	0.0251572	0.251612	1	2782	tags=30%, list=23%, signal=39%
MULLIGHAN_MLL_SIGNATURE_1_UP	285	0.301166	1.36456	0.00845411	0.223914	1	2742	tags=31%, list=23%, signal=39%
ZHANG_BREAST_CANCER_PROGENITORS_UP	332	0.301039	1.39086	0.00462963	0.20341	1	2541	tags=26%, list=21%, signal=32%
BERENJENO_TRANSFORMED_BY_RHOA_UP	407	0.300645	1.40451	0.00561798	0.192548	1	2886	tags=29%, list=24%, signal=37%
MIKKELSEN_NPC_ICP_WITH_H3K4ME3	229	0.299609	1.33789	0.0340479	0.251727	1	2793	tags=29%, list=23%, signal=37%
NAKAMURA_TUMOR_ZONE_PERIPHERAL_VS_CENTRAL_DN	400	0.298942	1.39552	0.00344037	0.199706	1	2450	tags=28%, list=20%, signal=33%
FLECHNER_BIOPSY_KIDNEY_TRANSPLANT_OK_VS_DONOR_UP	442	0.296431	1.40005	0.00336323	0.196634	1	2493	tags=24%, list=21%, signal=29%
GOBERT_OLIGODENDROCYTE_DIFFERENTIATION_UP	377	0.294675	1.3745	0.0022805	0.217526	1	1988	tags=22%, list=16%, signal=26%
CHICAS_RB1_TARGETS_SENESCENT	332	0.293185	1.35524	0.00814901	0.231699	1	2561	tags=28%, list=21%, signal=35%
RODRIGUES_THYROID_CARCINOMA_ANAPLASTIC_DN	302	0.291407	1.33625	0.0174825	0.251736	1	3008	tags=33%, list=25%, signal=43%
HAN_SATB1_TARGETS_UP	227	0.290964	1.30332	0.0344828	0.288274	1	2653	tags=30%, list=22%, signal=37%
FULCHER_INFLAMMATORY_RESPONSE_LECTIN_VS_LPS_UP	351	0.290304	1.34702	0.00909091	0.239575	1	2508	tags=26%, list=21%, signal=32%
DACOSTA_UV_RESPONSE_VIA_ERCC3_UP	247	0.289956	1.29165	0.0339806	0.298283	1	2475	tags=26%, list=21%, signal=32%
BRUINS_UVC_RESPONSE_VIA_TP53_GROUP_B	268	0.289888	1.31106	0.0279465	0.279746	1	2682	tags=28%, list=22%, signal=35%
ZHENG_BOUND_BY_FOXP3	355	0.287749	1.3436	0.00691244	0.243977	1	2683	tags=29%, list=22%, signal=36%
ONKEN_UVEAL_MELANOMA_DN	354	0.2852	1.32613	0.0209302	0.264066	1	2645	tags=26%, list=22%, signal=32%
MONNIER_POSTRADIATION_TUMOR_ESCAPE_DN	248	0.285083	1.26703	0.0436893	0.328719	1	2588	tags=27%, list=21%, signal=34%
REACTOME_HEMOSTASIS	286	0.282791	1.28185	0.0379147	0.310915	1	2376	tags=27%, list=20%, signal=32%
BAELDE_DIABETIC_NEPHROPATHY_DN	274	0.282404	1.28185	0.0445783	0.310577	1	2816	tags=30%, list=23%, signal=38%
KRIEG_HYPOXIA_NOT_VIA_KDM3A	479	0.280555	1.3358	0.00540541	0.2518	1	1658	tags=20%, list=14%, signal=22%
REACTOME_NEUTROPHIL_DEGRANULATION	311	0.280266	1.27891	0.0350242	0.314692	1	3512	tags=35%, list=29%, signal=48%
WONG_EMBRYONIC_STEM_CELL_CORE	286	0.278956	1.26579	0.044289	0.329259	1	3574	tags=34%, list=30%, signal=47%
CUI_TCF21_TARGETS_2_DN	467	0.275718	1.30191	0.0132597	0.29004	1	3149	tags=33%, list=26%, signal=43%
MARTINEZ_RB1_TARGETS_UP	395	0.274927	1.29438	0.0158192	0.29582	1	1857	tags=21%, list=15%, signal=23%
IVANOVA_HEMATOPOIESIS_LATE_PROGENITOR	350	0.274492	1.25839	0.036215	0.336961	1	1674	tags=17%, list=14%, signal=19%
TIEN_INTESTINE_PROBIOTICS_24HR_UP	481	0.274259	1.31153	0.0114548	0.279663	1	3264	tags=31%, list=27%, signal=40%
REACTOME_SIGNALING_BY_INTERLEUKINS	355	0.270998	1.25388	0.0284738	0.341677	1	1443	tags=17%, list=12%, signal=19%
KIM_ALL_DISORDERS_CALB1_CORR_UP	388	0.270137	1.26124	0.0350679	0.334948	1	2426	tags=21%, list=20%, signal=25%
