# Supplementary material for: The RNA helicase DDX39B activates FOXP3 RNA splicing to control T regulatory cell fate
Source: eLife. 2023 Jun 1;12:e76927. doi: 10.7554/eLife.76927 (PMC10234631; doi:10.7554/eLife.76927)
Supplement: Supplementary file 6. — Related to Figure 5 and Figure 5—figure supplement 3. [file elife-76927-supp6.xlsx]

## Sheet: Differential Splicing
Supplementary file 6. VastTool analysis of in CD4+ T cells with DDX39B-depletion. Related to Figures 5 and Figure 5-figure supplement 3.
		VastTool_D1-Sh3vNTC		VastTool_D4-Sh3vNTC
Gene	Event	MV015.E[dPsi]	MV015.MV[dPsi]_at_0.95	015MV.E[dPsi]	015MV.MV[dPsi]_at_0.95
ABCB9	HsaINT0001074†	0.305006	0.15	NA	NA				Sample	cutoff (MV[dPSI]_at_0.95)
ABCC2	HsaINT0001207	NA	NA	-0.51185	0.28				Donor1_Sh3	0.15
ABHD1	HsaINT0001621	NA	NA	0.598206	0.32				Donor4_Sh3	0.15
ABTB2	HsaINT0001936	-0.316322	0.18	NA	NA
ACADVL	HsaINT0002206	-0.176191	0.15	NA	NA
ACADVL	HsaINT0002207	-0.200033	0.18	-0.24649	0.22
ACAP3	HsaINT0002293	-0.221553	0.18	NA	NA				Event	Number
ACCN2	HsaINT0002364	NA	NA	-0.383235	0.15				Intron retention	784
ACCN2	HsaINT0002372	NA	NA	-0.412964	0.24				Cassette exon	488
ACCS	HsaINT0002413	-0.235107	0.15	NA	NA				Altanative 3' SS	179
ACOT11	HsaINT0002610	-0.261532	0.17	NA	NA				Altanative 5' SS	153
ACTR3B	HsaINT0003290	0.28499	0.15	NA	NA
ACVR2B	HsaINT0003379	-0.349807	0.15	NA	NA
ADAL	HsaINT0003456	-0.412723	0.27	NA	NA
ADAM23	HsaINT0003685	NA	NA	0.450248	0.22
ADAMTS13	HsaINT0003952	0.553869	0.28	NA	NA
AGBL3	HsaINT0005454	-0.375858	0.15	NA	NA
AGBL3	HsaINT0005455	NA	NA	0.509781	0.28
AGBL3	HsaINT0005458	-0.212574	0.15	NA	NA
AGPHD1	HsaINT0005642	NA	NA	-0.419543	0.23
AIM1L	HsaINT0006071	NA	NA	0.420015	0.27
AKR1C1	HsaINT0006501	NA	NA	0.474734	0.18
AKR1C2	HsaINT0006504	NA	NA	0.493502	0.18
AKR1C2	HsaINT0006509	-0.389984	0.17	NA	NA
AKR1C4	HsaINT0006526	0.367675	0.24	NA	NA
ALDH8A1	HsaINT0006913	NA	NA	0.330179	0.17
ALOX12P2	HsaINT0007230	0.516502	0.26	NA	NA
ALOX12P2	HsaINT0007233	-0.558616	0.3	NA	NA
ALOX12P2	HsaINT0007236	-0.516118	0.29	NA	NA
ALOX15	HsaINT0007249	-0.394294	0.25	NA	NA
ALS2CR12	HsaINT0007464	0.35584	0.2	NA	NA
AMDHD1	HsaINT0007563	0.529891	0.3	NA	NA
ANKRD13B	HsaINT0008433	NA	NA	-0.32176	0.21
ANPEP	HsaINT0009561	0.396895	0.15	NA	NA
AP1AR	HsaINT0009915	NA	NA	0.424682	0.27
APBA2	HsaINT0010308	NA	NA	-0.260179	0.17
APBB3	HsaINT0010379	-0.197621	0.15	NA	NA
APC	HsaINT0010398	0.368329	0.16	NA	NA
APH1B	HsaINT0010462	-0.333781	0.21	NA	NA
ARL13B	HsaINT0012372	NA	NA	0.621365	0.39
ARL16	HsaINT0012390	0.216022	0.16	NA	NA
ARRDC4	HsaINT0012845	NA	NA	0.459353	0.26
ARSG	HsaINT0012898	NA	NA	0.443204	0.25
AS3MT	HsaINT0012985	0.375421	0.15	NA	NA
ASAM	HsaINT0013040	-0.382865	0.21	NA	NA
ASH1L	HsaINT0013322	0.248888	0.2	NA	NA
ASPHD1	HsaINT0013457	0.60013	0.35	NA	NA
ATAD3C	HsaINT0013725	NA	NA	-0.376117	0.24
ATAD5	HsaINT0013756	0.236967	0.16	NA	NA
ATG2A	HsaINT0013949	NA	NA	0.430824	0.28
ATG9B	HsaINT0014130	0.616462	0.32	NA	NA
ATP13A4	HsaINT0014553	0.435213	0.29	NA	NA
ATP2A1	HsaINT0014714	0.509149	0.2	NA	NA
ATP6V1C2	HsaINT0015203	NA	NA	0.417112	0.17
ATP7B	HsaINT0015279	NA	NA	0.589502	0.34
ATP8B3	HsaINT0015446	NA	NA	-0.260577	0.16
ATXN1L	HsaINT0015752	NA	NA	-0.40216	0.23
ATXN3	HsaINT0015818	-0.475557	0.34	NA	NA
AURKC	HsaINT0015921	NA	NA	-0.633482	0.38
AVIL	HsaINT0015961	0.451161	0.15	0.376175	0.17
AVIL	HsaINT0015964	0.473718	0.28	NA	NA
AVIL	HsaINT0015965	0.495624	0.32	NA	NA
B3GAT1	HsaINT0016147	NA	NA	-0.645076	0.39
B4GALT2	HsaINT0016247	-0.394516	0.15	NA	NA
BAIAP2L1	HsaINT0016524	-0.548788	0.36	NA	NA
BAIAP2L2	HsaINT0016527	NA	NA	0.303055	0.18
BAIAP3	HsaINT0016565	0.261775	0.15	NA	NA
BBS5	HsaINT0016927	0.326927	0.15	NA	NA
BBS9	HsaINT0016950	NA	NA	-0.663353	0.4
BCL2L14	HsaINT0017206	-0.555413	0.26	NA	NA
BCO2	HsaINT0017308	-0.346646	0.18	NA	NA
BRSK1	HsaINT0018719	NA	NA	0.308288	0.15
BRSK1	HsaINT0018731	0.43303	0.22	NA	NA
BTAF1	HsaINT0018936	NA	NA	0.194939	0.15
BTBD19	HsaINT0018993	NA	NA	-0.260617	0.15
BTN2A2	HsaINT0019119	NA	NA	0.258211	0.19
BZRAP1	HsaINT0019282	-0.22702	0.16	NA	NA
C10orf18	HsaINT0019467	0.245109	0.16	NA	NA
C11orf65	HsaINT0019876	-0.428573	0.17	NA	NA
C11orf9	HsaINT0019977	-0.519343	0.25	NA	NA
C14orf45	HsaINT0020757	-0.421861	0.27	NA	NA
C14orf80	HsaINT0020829	-0.470149	0.26	NA	NA
C14orf80	HsaINT0020830	NA	NA	0.344285	0.21
C15orf33	HsaINT0020905	NA	NA	0.247235	0.15
C16orf86	HsaINT0021211	NA	NA	-0.290705	0.18
C17orf53	HsaINT0021325	-0.47687	0.27	NA	NA
C17orf57	HsaINT0021351	NA	NA	-0.387408	0.17
C17orf57	HsaINT0021352	-0.545973	0.26	NA	NA
C17orf57	HsaINT0021362	-0.520045	0.38	NA	NA
C19orf44	HsaINT0021752	-0.304501	0.15	NA	NA
C1S	HsaINT0021982	0.478663	0.3	NA	NA
C1S	HsaINT0021987	0.399467	0.19	NA	NA
C1orf135	HsaINT0022187	0.434759	0.16	NA	NA
C1orf228	HsaINT0022402	0.334153	0.2	NA	NA
C1orf86	HsaINT0022590	0.249022	0.17	NA	NA
C20orf165	HsaINT0022816	-0.458896	0.28	NA	NA
C20orf194	HsaINT0022870	0.266689	0.15	NA	NA
C20orf194	HsaINT0022896	0.323079	0.2	NA	NA
C21orf58	HsaINT0023122	NA	NA	-0.404528	0.27
C22orf15	HsaINT0023190	0.420508	0.26	NA	NA
C22orf23	HsaINT0023192	NA	NA	-0.418034	0.16
C22orf30	HsaINT0023222	0.257268	0.17	NA	NA
C2orf42	HsaINT0023433	NA	NA	-0.41209	0.25
C2orf56	HsaINT0023495	NA	NA	-0.660322	0.45
C2orf67	HsaINT0023555	0.214152	0.15	NA	NA
C3orf47	HsaINT0023892	-0.391372	0.18	NA	NA
C4BPB	HsaINT0024020	-0.526251	0.34	NA	NA
C5orf34	HsaINT0024302	0.280708	0.17	NA	NA
C5orf4	HsaINT0024336	-0.57701	0.35	NA	NA
C6orf147	HsaINT0024580	NA	NA	-0.341471	0.21
C6orf163	HsaINT0024600	NA	NA	0.249305	0.16
C6orf163	HsaINT0024601	0.279747	0.16	NA	NA
C6orf81	HsaINT0024811	NA	NA	-0.422955	0.25
C8G	HsaINT0025095	NA	NA	-0.324367	0.15
C8ORFK29	HsaINT0025104	0.327404	0.18	NA	NA
C8orf73	HsaINT0025203	NA	NA	0.491687	0.3
C8orf73	HsaINT0025215	NA	NA	0.305973	0.15
C9orf169	HsaINT0025382	-0.400246	0.25	NA	NA
C9orf68	HsaINT0025507	NA	NA	0.378527	0.16
C9orf82	HsaINT0025549	NA	NA	-0.277242	0.17
C9orf9	HsaINT0025606	NA	NA	0.374011	0.21
CA5A	HsaINT0025751	-0.381519	0.2	NA	NA
CACNA1D	HsaINT0026102	NA	NA	-0.539251	0.28
CACNA1I	HsaINT0026322	-0.311687	0.23	NA	NA
CACNA2D2	HsaINT0026459	NA	NA	0.390396	0.17
CADM4	HsaINT0026712	NA	NA	0.795782	0.57
CAMK1	HsaINT0026977	-0.279331	0.2	NA	NA
CAMKK1	HsaINT0027117	NA	NA	0.440651	0.25
CAPN12	HsaINT0027374	0.268052	0.15	0.935154	0.82
CARNS1	HsaINT0027795	-0.513571	0.32	NA	NA
CARNS1	HsaINT0027801	NA	NA	-0.483042	0.27
CARNS1	HsaINT0027803	NA	NA	-0.478033	0.31
CATSPERB	HsaINT0028266	NA	NA	0.419342	0.21
CATSPERG	HsaINT0028290	0.39449	0.15	NA	NA
CATSPERG	HsaINT0028303	0.368656	0.16	NA	NA
CATSPERG	HsaINT0028311	-0.417287	0.28	NA	NA
CATSPERG	HsaINT0028312	-0.386192	0.22	NA	NA
CATSPERG	HsaINT0028313	-0.326435	0.2	NA	NA
CATSPERG	HsaINT0028314	-0.273749	0.16	NA	NA
CBS	HsaINT0028442	-0.386748	0.21	NA	NA
CBX1	HsaINT0028481	NA	NA	-0.370802	0.19
CC2D2A	HsaINT0028579	0.672044	0.45	NA	NA
CCDC11	HsaINT0028792	0.412851	0.23	NA	NA
CCDC13	HsaINT0028944	NA	NA	-0.402735	0.16
CCDC136	HsaINT0029020	NA	NA	-0.311846	0.15
CCDC154	HsaINT0029263	-0.284794	0.16	NA	NA
CCDC154	HsaINT0029264	-0.454335	0.29	NA	NA
CCDC154	HsaINT0029275	0.353965	0.15	NA	NA
CCDC157	HsaINT0029301	NA	NA	0.315454	0.18
CCDC21	HsaINT0029403	NA	NA	0.268111	0.19
CCDC24	HsaINT0029430	NA	NA	0.494504	0.29
CCDC30	HsaINT0029468	-0.416903	0.17	NA	NA
CCDC51	HsaINT0029698	0.277893	0.15	NA	NA
CCDC57	HsaINT0029725	-0.206841	0.15	NA	NA
CCDC7	HsaINT0029868	0.322141	0.18	NA	NA
CCDC76	HsaINT0029935	-0.29932	0.24	NA	NA
CCDC78	HsaINT0029956	-0.468732	0.33	NA	NA
CCDC78	HsaINT0029958	NA	NA	-0.318067	0.16
CCDC78	HsaINT0029960	NA	NA	-0.354965	0.19
CCDC78	HsaINT0029963	-0.42499	0.3	NA	NA
CCDC78	HsaINT0029966	-0.483224	0.34	NA	NA
CCDC88A	HsaINT0030065	NA	NA	0.293903	0.19
CCDC88A	HsaINT0030066	0.372375	0.15	NA	NA
CCDC88C	HsaINT0030123	0.231451	0.15	NA	NA
CCL27	HsaINT0030284	NA	NA	-0.45792	0.3
CCL28	HsaINT0030286	0.449308	0.19	NA	NA
CCNE2	HsaINT0030417	NA	NA	-0.243901	0.17
CD101	HsaINT0030749	0.433964	0.28	NA	NA
CD244	HsaINT0030954	0.482361	0.23	NA	NA
CD302	HsaINT0031043	NA	NA	-0.299842	0.15
CD302	HsaINT0031046	-0.27957	0.16	NA	NA
CDAN1	HsaINT0031430	NA	NA	-0.240951	0.15
CDC42BPG	HsaINT0031734	0.520968	0.29	NA	NA
CDC42BPG	HsaINT0031735	NA	NA	0.309111	0.16
CDC45	HsaINT0031768	-0.347173	0.2	NA	NA
CDH23	HsaINT0032108	NA	NA	-0.442475	0.16
CDH24	HsaINT0032149	NA	NA	0.450988	0.24
CDHR3	HsaINT0032319	NA	NA	0.676284	0.43
CDKN2B-AS	HsaINT0032766	0.40142	0.21	NA	NA
CEL	HsaINT0033059	0.349283	0.15	NA	NA
CELSR3	HsaINT0033264	NA	NA	-0.277312	0.15
CEND1	HsaINT0033274	-0.69732	0.52	NA	NA
CENPM	HsaINT0033427	NA	NA	0.439381	0.24
CEP250	HsaINT0033698	0.410294	0.27	NA	NA
CEP250	HsaINT0033704	0.228653	0.17	NA	NA
CEP70	HsaINT0033892	-0.243226	0.15	NA	NA
CES3	HsaINT0034042	NA	NA	-0.52255	0.34
CKMT2	HsaINT0035689	NA	NA	0.350372	0.15
CKMT2	HsaINT0035694	NA	NA	0.372848	0.15
CLDND2	HsaINT0036097	NA	NA	-0.277504	0.16
CLEC18A	HsaINT0036159	NA	NA	-0.289476	0.17
CLEC18A	HsaINT0036162	NA	NA	-0.315564	0.15
CLEC18B	HsaINT0036172	NA	NA	-0.315009	0.16
CLEC4A	HsaINT0036217	NA	NA	-0.33599	0.15
CLEC4A	HsaINT0036218	NA	NA	0.335101	0.18
CLECL1	HsaINT0036295	-0.364406	0.24	NA	NA
CNTNAP1	HsaINT0037555	NA	NA	-0.55371	0.3
CNTNAP1	HsaINT0037556	NA	NA	-0.349464	0.15
CNTNAP1	HsaINT0037571	-0.363344	0.17	NA	NA
CROCCP3	HsaINT0041646	-0.35048	0.17	NA	NA
CTHRC1	HsaINT0042767	NA	NA	-0.376318	0.15
CYB5A	HsaINT0043882	NA	NA	-0.277599	0.21
CYP27B1	HsaINT0044190	0.672092	0.43	0.468618	0.19
CYP2D6	HsaINT0044278	NA	NA	0.30958	0.22
CYP2E1	HsaINT0044296	NA	NA	-0.421706	0.19
DAPK2	HsaINT0044940	NA	NA	-0.399093	0.23
DCUN1D3	HsaINT0045722	-0.356944	0.17	NA	NA
DDX43	HsaINT0046273	0.313853	0.2	NA	NA
DERL3	HsaINT0047049	-0.266683	0.15	NA	NA
DGKE	HsaINT0047259	0.242706	0.19	NA	NA
DHDH	HsaINT0047467	NA	NA	-0.59197	0.28
DKFZP686I15217	HsaINT0048333	-0.302559	0.16	NA	NA
DLG1	HsaINT0048480	NA	NA	-0.660711	0.39
DLGAP4	HsaINT0048654	NA	NA	0.349789	0.21
DLL1	HsaINT0048696	0.714075	0.43	NA	NA
DMC1	HsaINT0048826	NA	NA	-0.436269	0.19
DNAH1	HsaINT0049142	0.237773	0.15	NA	NA
DNAH10	HsaINT0049286	0.316037	0.21	NA	NA
DNAH11	HsaINT0049369	0.526435	0.28	NA	NA
DNAH17	HsaINT0049536	-0.607969	0.36	NA	NA
DNAH17	HsaINT0049587	-0.248167	0.15	NA	NA
DNHD1	HsaINT0050593	NA	NA	-0.250152	0.18
DOCK7	HsaINT0051309	0.3734	0.25	NA	NA
DOK4	HsaINT0051474	NA	NA	-0.306446	0.15
DPEP3	HsaINT0051649	0.397754	0.15	0.578916	0.32
DPP7	HsaINT0051824	NA	NA	-0.192087	0.15
DPY19L2P2	HsaINT0051971	0.33448	0.18	NA	NA
DSCC1	HsaINT0052378	-0.29939	0.19	NA	NA
DYNC2H1	HsaINT0053196	NA	NA	0.365616	0.15
DYRK1A	HsaINT0053314	0.329392	0.15	0.404793	0.17
E2F5	HsaINT0053540	NA	NA	-0.531477	0.24
E2F7	HsaINT0053559	NA	NA	-0.305251	0.16
ECHDC3	HsaINT0053806	0.435701	0.2	NA	NA
ECM1	HsaINT0053816	-0.456086	0.21	NA	NA
ECM1	HsaINT0053819	-0.422118	0.21	NA	NA
EFHA2	HsaINT0054347	NA	NA	-0.301727	0.16
ELL3	HsaINT0055581	0.424091	0.21	NA	NA
ELL3	HsaINT0055590	-0.376042	0.2	NA	NA
EMILIN1	HsaINT0055912	0.447378	0.23	NA	NA
EMILIN1	HsaINT0055913	0.35722	0.23	NA	NA
EML5	HsaINT0056043	0.390622	0.27	NA	NA
EML5	HsaINT0056047	-0.298783	0.17	NA	NA
EP400NL	HsaINT0056661	0.300022	0.22	NA	NA
EPHB3	HsaINT0057104	NA	NA	-0.49122	0.22
ERBB3	HsaINT0057538	NA	NA	-0.411747	0.22
ERCC4	HsaINT0057670	-0.290442	0.18	NA	NA
ERI2	HsaINT0057792	-0.480903	0.21	NA	NA
ESPN	HsaINT0058058	-0.857209	0.66	NA	NA
ESPN	HsaINT0058059	NA	NA	-0.604342	0.36
ESPN	HsaINT0058066	NA	NA	0.617473	0.39
ETV2	HsaINT0058354	0.411641	0.16	NA	NA
EXD3	HsaINT0058594	NA	NA	-0.371922	0.24
EXOC3L	HsaINT0058670	NA	NA	0.408972	0.17
FAM120C	HsaINT0059674	NA	NA	0.305245	0.16
FAM132A	HsaINT0059825	NA	NA	-0.359424	0.19
FAM164C	HsaINT0060195	NA	NA	0.391424	0.2
FAM167B	HsaINT0060212	-0.401097	0.18	NA	NA
FAM179A	HsaINT0060363	NA	NA	-0.287728	0.16
FAM179A	HsaINT0060366	NA	NA	0.313051	0.16
FAM179B	HsaINT0060385	NA	NA	0.45297	0.27
FAM18B2	HsaINT0060557	0.293565	0.21	NA	NA
FAM66C	HsaINT0061333	0.363591	0.2	0.36339	0.24
FAM83H	HsaINT0061572	-0.53456	0.34	NA	NA
FANCL	HsaINT0061911	0.244997	0.15	NA	NA
FARP1	HsaINT0062002	NA	NA	-0.331711	0.15
FARP1	HsaINT0062007	NA	NA	-0.654417	0.42
FARP1	HsaINT0062008	NA	NA	-0.460566	0.19
FARP2	HsaINT0062031	0.346228	0.2	NA	NA
FBRSL1	HsaINT0062589	-0.373613	0.24	NA	NA
FBXO24	HsaINT0062824	0.376917	0.16	NA	NA
FBXO24	HsaINT0062826	NA	NA	-0.460318	0.25
FBXO24	HsaINT0062831	0.373181	0.17	NA	NA
FBXO24	HsaINT0062832	0.443739	0.3	NA	NA
FER1L4	HsaINT0063502	NA	NA	-0.435925	0.22
FES	HsaINT0063662	0.416776	0.15	NA	NA
FGD2	HsaINT0063747	NA	NA	-0.579397	0.34
FIZ1	HsaINT0064280	0.383058	0.25	NA	NA
FKRP	HsaINT0064398	0.386957	0.25	NA	NA
FLJ32224	HsaINT0064573	NA	NA	-0.378741	0.25
FLJ37035	HsaINT0064606	-0.361918	0.22	NA	NA
FLJ39653	HsaINT0064630	0.30212	0.19	NA	NA
FLNA	HsaINT0064784	-0.430952	0.28	NA	NA
FN1	HsaINT0065285	NA	NA	-0.498312	0.23
FOSL1	HsaINT0065568	0.437487	0.27	NA	NA
FRMD4A	HsaINT0065989	NA	NA	-0.271143	0.17
FRMD4A	HsaINT0065991	0.652493	0.42	NA	NA
FRMD4A	HsaINT0065993	0.449151	0.21	NA	NA
FRMD6	HsaINT0066045	-0.399013	0.21	NA	NA
FYB	HsaINT0066788	-0.174989	0.15	NA	NA
GAS6	HsaINT0067856	0.271115	0.18	NA	NA
GAS8	HsaINT0067873	NA	NA	0.442347	0.2
GGN	HsaINT0068861	NA	NA	0.348613	0.15
GIGYF2	HsaINT0069070	0.316725	0.16	NA	NA
GIPR	HsaINT0069148	-0.462682	0.29	NA	NA
GLB1L2	HsaINT0069353	NA	NA	0.582649	0.28
GLB1L3	HsaINT0069354	-0.491685	0.23	NA	NA
GLB1L3	HsaINT0069357	NA	NA	0.363457	0.18
GLI1	HsaINT0069461	NA	NA	0.447653	0.19
GLI1	HsaINT0069462	-0.644743	0.41	NA	NA
GLS	HsaINT0069666	NA	NA	0.198852	0.16
GLS2	HsaINT0069679	0.269151	0.16	NA	NA
GLS2	HsaINT0069682	-0.277046	0.17	NA	NA
GLS2	HsaINT0069684	0.287793	0.17	NA	NA
GLS2	HsaINT0069686	NA	NA	0.294851	0.19
GLS2	HsaINT0069690	0.287038	0.18	NA	NA
GLT8D2	HsaINT0069738	-0.340684	0.19	NA	NA
GMEB2	HsaINT0069881	-0.340701	0.19	NA	NA
GMPR	HsaINT0069957	0.630292	0.35	NA	NA
GNA11	HsaINT0069985	0.426893	0.18	NA	NA
GNB4	HsaINT0070148	NA	NA	-0.590928	0.41
GNB4	HsaINT0070152	NA	NA	-0.565812	0.44
GPAT2	HsaINT0070909	NA	NA	-0.32742	0.17
GPR113	HsaINT0071332	0.427568	0.15	NA	NA
GPR113	HsaINT0071336	NA	NA	-0.433254	0.18
GPR114	HsaINT0071341	NA	NA	0.536299	0.24
GPR114	HsaINT0071348	-0.248995	0.15	NA	NA
GPR19	HsaINT0071649	0.329956	0.2	NA	NA
GRB10	HsaINT0072120	-0.604353	0.37	NA	NA
GRM2	HsaINT0072747	0.606897	0.33	NA	NA
GRM2	HsaINT0072748	-0.496459	0.3	NA	NA
GTF2IRD1	HsaINT0073336	0.366882	0.15	NA	NA
HAUS3	HsaINT0074256	0.288207	0.2	NA	NA
HAVCR1	HsaINT0074327	0.304161	0.2	NA	NA
HEATR4	HsaINT0074908	-0.42621	0.21	NA	NA
HEATR4	HsaINT0074914	0.458948	0.27	NA	NA
HEXDC	HsaINT0075813	NA	NA	-0.213932	0.17
HFE	HsaINT0075831	-0.359591	0.16	NA	NA
HIST1H3D	HsaINT0076310	NA	NA	-0.427795	0.27
HLCS	HsaINT0076485	NA	NA	-0.596524	0.4
HOMER3	HsaINT0077164	-0.462835	0.19	NA	NA
HOXB2	HsaINT0077290	-0.227272	0.16	NA	NA
HOXB3	HsaINT0077293	0.473054	0.22	NA	NA
HPGDS	HsaINT0077376	-0.570691	0.27	NA	NA
HSD11B1L	HsaINT0077617	-0.432342	0.23	NA	NA
HSD11B1L	HsaINT0077618	0.360228	0.15	NA	NA
HTR2B	HsaINT0078164	0.5082	0.24	NA	NA
HYI	HsaINT0078513	-0.264473	0.18	-0.42143	0.29
HYI	HsaINT0078514	-0.225283	0.17	-0.229383	0.17
HYI	HsaINT0078516	-0.39331	0.32	NA	NA
HYI	HsaINT0078517	-0.342276	0.26	-0.26679	0.2
IFT140	HsaINT0079063	NA	NA	0.273297	0.15
IFT140	HsaINT0079072	-0.400123	0.26	NA	NA
IFT172	HsaINT0079132	NA	NA	-0.289319	0.19
IGFBP3	HsaINT0079439	0.560827	0.37	NA	NA
IGSF6	HsaINT0079615	0.378362	0.22	NA	NA
IL18RAP	HsaINT0080068	-0.25448	0.16	NA	NA
IQGAP3	HsaINT0081881	0.414493	0.22	0.437104	0.21
IQSEC1	HsaINT0081882	0.415682	0.15	NA	NA
ITIH4	HsaINT0083044	0.253364	0.15	NA	NA
IZUMO4	HsaINT0083505	0.276396	0.2	NA	NA
JAG2	HsaINT0083548	0.320705	0.15	NA	NA
JAG2	HsaINT0083549	0.40937	0.19	NA	NA
KAT2A	HsaINT0084050	0.219164	0.16	NA	NA
KATNAL2	HsaINT0084107	0.470858	0.3	NA	NA
KBTBD4	HsaINT0084173	NA	NA	-0.2538	0.15
KCNAB3	HsaINT0084236	-0.375967	0.2	NA	NA
KCNH3	HsaINT0084322	NA	NA	0.37126	0.15
KCNH3	HsaINT0084328	NA	NA	0.311131	0.15
KCNH3	HsaINT0084330	NA	NA	0.358414	0.2
KCNQ5	HsaINT0084686	0.519105	0.29	NA	NA
KCNT1	HsaINT0084714	-0.381049	0.22	NA	NA
KIAA1310	HsaINT0086670	0.231727	0.15	NA	NA
KIAA1875	HsaINT0087269	0.302929	0.18	NA	NA
KIAA1875	HsaINT0087277	-0.327754	0.18	NA	NA
KIAA1875	HsaINT0087280	-0.390933	0.25	NA	NA
KIF7	HsaINT0088194	0.568182	0.3	NA	NA
KIF9	HsaINT0088210	NA	NA	-0.60977	0.33
KIFC3	HsaINT0088270	0.534199	0.3	NA	NA
KLF8	HsaINT0088517	0.421509	0.21	NA	NA
KLHDC8B	HsaINT0088585	NA	NA	0.413396	0.16
KLHL20	HsaINT0088676	0.234271	0.15	NA	NA
KLHL29	HsaINT0088723	NA	NA	-0.469766	0.23
KLKB1	HsaINT0088898	0.502609	0.26	NA	NA
KPTN	HsaINT0089240	-0.429899	0.28	NA	NA
KRT72	HsaINT0089611	0.336374	0.21	NA	NA
KSR1	HsaINT0089767	0.342654	0.16	NA	NA
L2HGDH	HsaINT0089907	0.227818	0.15	NA	NA
LAMB1	HsaINT0090390	NA	NA	0.408843	0.21
LAMC3	HsaINT0090542	-0.774202	0.58	NA	NA
LAMC3	HsaINT0090549	-0.437597	0.17	NA	NA
LAT2	HsaINT0090882	0.463422	0.28	NA	NA
LCNL1	HsaINT0091047	0.415254	0.18	NA	NA
LGALS17A	HsaINT0091492	0.515197	0.36	NA	NA
LGALS4	HsaINT0091508	NA	NA	0.322807	0.17
LGALS4	HsaINT0091511	0.369886	0.16	NA	NA
LIMA1	HsaINT0091940	NA	NA	-0.356833	0.2
LOC100128398	HsaINT0092749	-0.340194	0.23	NA	NA
LOC100130950	HsaINT0092942	-0.320272	0.15	-0.324684	0.17
LOC100130987	HsaINT0092952	0.298484	0.16	NA	NA
LOC100131067	HsaINT0092961	NA	NA	-0.34624	0.21
LOC100132273	HsaINT0093030	0.450213	0.22	NA	NA
LOC100132741	HsaINT0093049	-0.346648	0.18	NA	NA
LOC100133050	HsaINT0093065	0.362127	0.24	NA	NA
LOC100134868	HsaINT0093105	0.364492	0.18	NA	NA
LOC100272228	HsaINT0093208	NA	NA	0.389763	0.22
LOC100289373	HsaINT0093277	0.558486	0.28	NA	NA
LOC113230	HsaINT0093334	-0.422153	0.22	NA	NA
LOC254559	HsaINT0093626	-0.608717	0.3	NA	NA
LOC283314	HsaINT0093703	0.282166	0.19	NA	NA
LOC389247	HsaINT0094284	NA	NA	-0.440214	0.24
LOC389458	HsaINT0094287	NA	NA	0.421916	0.21
LOC390940	HsaINT0094319	NA	NA	0.322001	0.15
LOC390940	HsaINT0094321	NA	NA	-0.343054	0.16
LOC399744	HsaINT0094344	0.176607	0.15	NA	NA
LOC400236	HsaINT0094370	NA	NA	-0.512854	0.25
LOC401397	HsaINT0094471	NA	NA	-0.280921	0.16
LOC731789	HsaINT0095360	0.365286	0.19	NA	NA
LOC731789	HsaINT0095361	0.75618	0.53	NA	NA
LOC81691	HsaINT0095375	-0.593971	0.3	NA	NA
LOC81691	HsaINT0095384	-0.336157	0.16	NA	NA
LPGAT1	HsaINT0095718	0.428259	0.18	NA	NA
LPHN1	HsaINT0095736	-0.260403	0.17	NA	NA
LPHN1	HsaINT0095740	0.280895	0.18	NA	NA
LRP2BP	HsaINT0096462	NA	NA	-0.328785	0.15
LRP2BP	HsaINT0096464	-0.338996	0.22	NA	NA
LRRC16A	HsaINT0096655	0.429111	0.21	NA	NA
LRRC16B	HsaINT0096704	NA	NA	-0.397394	0.17
LRRC2	HsaINT0096732	0.363827	0.18	NA	NA
LRRC29	HsaINT0096781	0.385018	0.23	NA	NA
LRRC29	HsaINT0096785	0.311935	0.18	NA	NA
LRRC34	HsaINT0096800	-0.5293	0.23	NA	NA
LRRC46	HsaINT0096933	NA	NA	0.524879	0.22
LRRC69	HsaINT0097034	NA	NA	0.446084	0.28
LRRC8B	HsaINT0097071	0.288041	0.18	NA	NA
LRRFIP1	HsaINT0097108	NA	NA	-0.289549	0.15
LSS	HsaINT0097462	-0.203106	0.15	NA	NA
LTC4S	HsaINT0097641	-0.534215	0.42	NA	NA
LYSMD2	HsaINT0097958	0.265757	0.16	NA	NA
MAD2L1BP	HsaINT0098248	NA	NA	-0.274591	0.17
MAMSTR	HsaINT0098665	NA	NA	0.403412	0.2
MAP3K13	HsaINT0099068	0.351504	0.19	NA	NA
MAP3K15	HsaINT0099111	0.493963	0.22	NA	NA
MAPK8IP3	HsaINT0099690	-0.348359	0.24	NA	NA
MBOAT2	HsaINT0100477	NA	NA	0.456944	0.23
MBP	HsaINT0100503	0.319534	0.16	NA	NA
MCF2L2	HsaINT0100716	0.290752	0.15	NA	NA
MCF2L2	HsaINT0100718	0.304844	0.19	NA	NA
MED26	HsaINT0101652	0.280936	0.16	NA	NA
METT5D1	HsaINT0102147	0.397471	0.15	NA	NA
MFSD7	HsaINT0102452	-0.46559	0.26	NA	NA
MLF1	HsaINT0103372	-0.345964	0.18	NA	NA
MLST8	HsaINT0103764	0.279388	0.15	NA	NA
MMP24	HsaINT0104031	-0.351546	0.25	NA	NA
MMP25	HsaINT0104033	-0.236147	0.15	NA	NA
MMP25	HsaINT0104035	-0.213091	0.15	NA	NA
MMP25	HsaINT0104036	-0.187986	0.15	NA	NA
MMP25	HsaINT0104037	-0.203301	0.17	-0.181917	0.15
MOCS2	HsaINT0104245	-0.324347	0.18	NA	NA
MPV17L	HsaINT0104873	0.552423	0.29	NA	NA
MTHFD2L	HsaINT0106080	0.496981	0.2	NA	NA
MTMR11	HsaINT0106181	0.346996	0.21	NA	NA
MTMR11	HsaINT0106182	NA	NA	-0.307893	0.17
MTSS1	HsaINT0106498	NA	NA	-0.40234	0.17
MTSS1L	HsaINT0106512	0.311047	0.2	NA	NA
MX1	HsaINT0107023	0.49609	0.28	NA	NA
MYH10	HsaINT0107468	NA	NA	-0.456833	0.32
MYH3	HsaINT0107731	0.424864	0.23	NA	NA
MYH7B	HsaINT0107891	0.346746	0.18	NA	NA
MYH7B	HsaINT0107892	0.570673	0.39	NA	NA
MYLK4	HsaINT0108139	0.447884	0.19	NA	NA
MYO15B	HsaINT0108271	-0.446544	0.26	NA	NA
MYO15B	HsaINT0108282	0.360186	0.17	NA	NA
MYO1E	HsaINT0108592	NA	NA	-0.380394	0.17
MYO5A	HsaINT0108777	0.324143	0.24	NA	NA
MYO5C	HsaINT0108836	-0.737321	0.54	NA	NA
MYO5C	HsaINT0108848	NA	NA	-0.414356	0.2
NAPRT1	HsaINT0109965	-0.20382	0.15	NA	NA
NAPSA	HsaINT0109980	NA	NA	0.270635	0.15
NBPF1	HsaINT0110488	0.328146	0.2	NA	NA
NBPF3	HsaINT0110663	0.235196	0.16	NA	NA
NCRNA00188	HsaINT0111539	NA	NA	-0.460054	0.26
NDRG4	HsaINT0111796	-0.592669	0.31	NA	NA
NEB	HsaINT0112110	0.508448	0.27	NA	NA
NEB	HsaINT0112123	NA	NA	0.73365	0.42
NEB	HsaINT0112136	NA	NA	0.488885	0.26
NEB	HsaINT0112137	0.327093	0.16	NA	NA
NEB	HsaINT0112150	-0.49746	0.28	NA	NA
NEB	HsaINT0112153	NA	NA	0.343243	0.17
NEURL	HsaINT0112798	0.353759	0.16	NA	NA
NFKBIL2	HsaINT0113172	0.37989	0.29	NA	NA
NHLH1	HsaINT0113413	NA	NA	-0.457114	0.19
NIPSNAP3B	HsaINT0113693	0.370218	0.17	NA	NA
NLGN3	HsaINT0113854	0.365614	0.21	NA	NA
NOXA1	HsaINT0115005	0.658086	0.35	NA	NA
NOXO1	HsaINT0115018	NA	NA	0.484476	0.24
NPM2	HsaINT0115347	NA	NA	0.457708	0.17
NPR2	HsaINT0115402	NA	NA	0.318889	0.15
NPR2	HsaINT0115416	NA	NA	-0.361547	0.2
NR1H3	HsaINT0115535	NA	NA	-0.376796	0.16
NR1H3	HsaINT0115536	0.352095	0.15	NA	NA
NRIP3	HsaINT0115916	-0.455456	0.2	NA	NA
NTNG2	HsaINT0116420	-0.402774	0.27	-0.285734	0.17
ODF3B	HsaINT0117861	NA	NA	-0.22418	0.16
ODZ1	HsaINT0117876	0.437099	0.2	NA	NA
ODZ1	HsaINT0117886	0.362829	0.17	NA	NA
ODZ1	HsaINT0117892	NA	NA	-0.394445	0.2
OMG	HsaINT0118210	0.337756	0.2	0.259791	0.17
ORC6	HsaINT0118499	NA	NA	-0.427816	0.31
OSBP2	HsaINT0118550	NA	NA	-0.406565	0.2
OSBP2	HsaINT0118557	-0.281898	0.15	NA	NA
OSGIN2	HsaINT0118817	0.29769	0.15	NA	NA
OTUD4	HsaINT0119009	0.330928	0.15	NA	NA
OXT	HsaINT0119208	0.429627	0.15	NA	NA
PALLD	HsaINT0119860	NA	NA	-0.401476	0.18
PALLD	HsaINT0119861	NA	NA	-0.769639	0.62
PATZ1	HsaINT0120710	-0.33778	0.24	NA	NA
PC	HsaINT0120901	-0.373898	0.2	NA	NA
PCBP3	HsaINT0120938	0.64728	0.43	NA	NA
PCOTH	HsaINT0121525	NA	NA	-0.571312	0.35
PCSK4	HsaINT0121565	-0.32969	0.16	NA	NA
PCSK6	HsaINT0121619	NA	NA	0.331579	0.17
PDE5A	HsaINT0122134	NA	NA	-0.423314	0.19
PDE5A	HsaINT0122138	0.417697	0.18	NA	NA
PER1	HsaINT0123048	-0.229806	0.15	NA	NA
PFKFB2	HsaINT0123331	NA	NA	-0.339367	0.15
PGAP1	HsaINT0123482	0.224519	0.18	NA	NA
PHACTR4	HsaINT0123762	0.393812	0.25	NA	NA
PI16	HsaINT0124486	NA	NA	0.279447	0.18
PIK3R2	HsaINT0125139	NA	NA	-0.279246	0.17
PIK3R6	HsaINT0125202	NA	NA	-0.515774	0.23
PILRA	HsaINT0125250	0.432937	0.3	NA	NA
PLA2G10	HsaINT0126277	NA	NA	-0.245469	0.16
PLEKHA2	HsaINT0127131	NA	NA	-0.333726	0.21
PLEKHG5	HsaINT0127375	-0.466449	0.29	NA	NA
PLN	HsaINT0127689	NA	NA	-0.484033	0.25
PLXDC1	HsaINT0127875	-0.606475	0.31	NA	NA
PLXDC1	HsaINT0127883	NA	NA	0.530362	0.31
PLXDC1	HsaINT0127884	NA	NA	0.550189	0.28
PM20D1	HsaINT0128203	0.431805	0.19	NA	NA
PM20D1	HsaINT0128205	-0.51455	0.24	NA	NA
POLR3G	HsaINT0129442	0.412709	0.2	NA	NA
PORCN	HsaINT0129693	-0.251239	0.17	NA	NA
PPARA	HsaINT0129936	0.256503	0.17	NA	NA
PPIP5K1	HsaINT0130334	-0.582756	0.38	NA	NA
PPP1R13L	HsaINT0130637	0.479248	0.3	NA	NA
PPP2R3A	HsaINT0130847	NA	NA	0.440853	0.2
PQLC2	HsaINT0131235	NA	NA	-0.248073	0.15
PRB3	HsaINT0131297	NA	NA	-0.402996	0.2
PRH1	HsaINT0131686	NA	NA	0.327822	0.16
PRICKLE4	HsaINT0131735	0.435632	0.24	NA	NA
PRICKLE4	HsaINT0131738	-0.268595	0.18	NA	NA
PROCA1	HsaINT0132395	NA	NA	-0.2603	0.15
PRPF40B	HsaINT0132659	-0.432504	0.27	NA	NA
PRPF40B	HsaINT0132660	NA	NA	-0.851552	0.7
PRR4	HsaINT0132836	0.40972	0.22	NA	NA
PRR7	HsaINT0132867	NA	NA	-0.294533	0.16
PRRG2	HsaINT0132885	0.452772	0.21	NA	NA
PSD3	HsaINT0133176	-0.705259	0.48	NA	NA
PTBP2	HsaINT0133822	-0.249429	0.16	NA	NA
PTCH1	HsaINT0133879	-0.320792	0.15	NA	NA
PTCH2	HsaINT0133892	NA	NA	0.473831	0.26
PTK6	HsaINT0134183	NA	NA	-0.724206	0.48
PTK6	HsaINT0134184	-0.414117	0.27	NA	NA
PTK6	HsaINT0134186	NA	NA	-0.460783	0.28
PTPLA	HsaINT0134261	NA	NA	-0.443433	0.18
PTPRN2	HsaINT0134973	0.355587	0.2	NA	NA
PTPRVP	HsaINT0135168	-0.621125	0.35	NA	NA
PTPRVP	HsaINT0135181	-0.478774	0.22	NA	NA
PYGM	HsaINT0135606	NA	NA	-0.531104	0.36
PYROXD2	HsaINT0135638	NA	NA	-0.341611	0.23
RAB1A	HsaINT0136002	NA	NA	0.279264	0.23
RAB23	HsaINT0136024	NA	NA	-0.341163	0.16
RAB37	HsaINT0136120	NA	NA	-0.333507	0.2
RAB3IP	HsaINT0136230	NA	NA	0.312928	0.17
RAD54L	HsaINT0136709	-0.350627	0.23	NA	NA
RAD9B	HsaINT0136759	0.421914	0.23	NA	NA
RALGAPA2	HsaINT0136961	NA	NA	-0.233494	0.17
RAPGEFL1	HsaINT0137483	0.297092	0.18	NA	NA
RAPH1	HsaINT0137490	0.442116	0.27	NA	NA
RAPH1	HsaINT0137492	0.429563	0.15	NA	NA
RASGRP4	HsaINT0137903	-0.410614	0.28	-0.468432	0.33
RASGRP4	HsaINT0137912	-0.30997	0.17	-0.425402	0.3
RBM11	HsaINT0138300	NA	NA	-0.522673	0.34
RBM44	HsaINT0138559	-0.519803	0.29	NA	NA
RFC2	HsaINT0139585	0.445236	0.22	NA	NA
RFX2	HsaINT0139750	NA	NA	0.417542	0.17
RGS10	HsaINT0140078	-0.465959	0.29	-0.479474	0.27
RHOBTB2	HsaINT0140488	NA	NA	-0.344592	0.17
RIBC2	HsaINT0140616	NA	NA	-0.525759	0.28
RNF43	HsaINT0141829	NA	NA	0.308655	0.2
ROBO3	HsaINT0142051	0.375276	0.19	NA	NA
ROCK2	HsaINT0142116	NA	NA	-0.36131	0.26
ROM1	HsaINT0142171	NA	NA	-0.38294	0.23
RPS6KL1	HsaINT0143171	-0.468732	0.22	NA	NA
RPSAP58	HsaINT0143196	0.388197	0.21	NA	NA
RTKN	HsaINT0143810	-0.54292	0.3	NA	NA
RTKN2	HsaINT0143818	0.404521	0.22	NA	NA
RUNDC3A	HsaINT0144026	NA	NA	0.541889	0.31
RYR1	HsaINT0144286	0.390859	0.24	NA	NA
S100Z	HsaINT0144581	0.343861	0.16	NA	NA
SAMD4A	HsaINT0144794	-0.447626	0.16	NA	NA
SCARF2	HsaINT0145470	0.302943	0.15	NA	NA
SCARF2	HsaINT0145474	NA	NA	0.514949	0.25
SCNN1A	HsaINT0146006	-0.429918	0.15	NA	NA
SDK2	HsaINT0146540	-0.495994	0.2	NA	NA
SELP	HsaINT0147173	NA	NA	0.446791	0.17
SEMA4G	HsaINT0147402	NA	NA	-0.246809	0.15
SERHL	HsaINT0147904	NA	NA	-0.232029	0.16
SERHL2	HsaINT0147913	NA	NA	-0.229773	0.15
SESTD1	HsaINT0148223	-0.495896	0.16	NA	NA
SFXN4	HsaINT0148839	-0.236279	0.15	NA	NA
SGCE	HsaINT0148887	0.345157	0.2	NA	NA
SGK1	HsaINT0148946	-0.321243	0.16	NA	NA
SIGLEC10	HsaINT0149956	NA	NA	-0.394646	0.16
SIGLEC10	HsaINT0149959	NA	NA	0.681485	0.54
SIGLEC10	HsaINT0149962	NA	NA	0.489984	0.31
SIGLEC9	HsaINT0150026	-0.423756	0.27	NA	NA
SIPA1L2	HsaINT0150229	NA	NA	0.495108	0.26
SLC16A11	HsaINT0150974	0.462347	0.22	NA	NA
SLC16A4	HsaINT0151003	0.537043	0.29	NA	NA
SLC17A9	HsaINT0151132	NA	NA	-0.277235	0.18
SLC22A5	HsaINT0151438	NA	NA	0.371133	0.24
SLC23A1	HsaINT0151482	-0.695475	0.44	NA	NA
SLC25A34	HsaINT0151826	0.654005	0.44	NA	NA
SLC25A34	HsaINT0151829	NA	NA	-0.540869	0.29
SLC3A1	HsaINT0153054	-0.413939	0.27	NA	NA
SLC3A1	HsaINT0153056	NA	NA	-0.402602	0.25
SLC4A5	HsaINT0153449	-0.397375	0.21	NA	NA
SLC4A5	HsaINT0153457	0.338312	0.22	NA	NA
SLC4A7	HsaINT0153490	0.283597	0.18	NA	NA
SLC6A16	HsaINT0153791	NA	NA	-0.61294	0.44
SLIT1	HsaINT0154494	0.5777	0.31	NA	NA
SMARCD3	HsaINT0155049	-0.320164	0.17	NA	NA
SMC1B	HsaINT0155093	0.557059	0.4	NA	NA
SMC1B	HsaINT0155101	NA	NA	0.396055	0.23
SMG7	HsaINT0155428	NA	NA	-0.396733	0.19
SNED1	HsaINT0155883	0.437498	0.19	NA	NA
SNED1	HsaINT0155891	NA	NA	-0.317078	0.16
SNX21	HsaINT0156351	NA	NA	-0.558717	0.36
SNX32	HsaINT0156435	-0.336123	0.15	NA	NA
SPAG1	HsaINT0157138	-0.417781	0.24	NA	NA
SPAG4	HsaINT0157227	0.522874	0.29	NA	NA
SPATA1	HsaINT0157375	NA	NA	-0.380243	0.23
SPATA18	HsaINT0157424	NA	NA	0.340352	0.15
SPC24	HsaINT0157584	-0.41593	0.29	NA	NA
SPDYA	HsaINT0157609	NA	NA	-0.616123	0.38
SPIN3	HsaINT0157927	-0.357655	0.19	NA	NA
SPIRE2	HsaINT0158029	0.393735	0.19	NA	NA
SPTBN5	HsaINT0158577	0.277375	0.22	NA	NA
STAG3	HsaINT0160196	NA	NA	-0.25796	0.16
STAG3	HsaINT0160214	0.256897	0.15	NA	NA
STARD5	HsaINT0160366	-0.274089	0.17	NA	NA
STARD8	HsaINT0160382	NA	NA	0.399469	0.2
STRC	HsaINT0161132	NA	NA	-0.500051	0.25
STRC	HsaINT0161140	NA	NA	0.720435	0.47
SUCLG2	HsaINT0161567	0.354745	0.15	NA	NA
SUGT1P1	HsaINT0161642	-0.871612	0.79	NA	NA
SULF2	HsaINT0161678	-0.442415	0.28	NA	NA
SULF2	HsaINT0161685	-0.418185	0.21	NA	NA
SYCE1L	HsaINT0162310	NA	NA	-0.6594	0.45
SYCE2	HsaINT0162315	NA	NA	-0.646532	0.47
SYCP3	HsaINT0162426	-0.380145	0.19	-0.339954	0.17
SYCP3	HsaINT0162427	NA	NA	-0.325498	0.17
TATDN3	HsaINT0163894	0.233182	0.15	NA	NA
TBC1D12	HsaINT0163983	NA	NA	0.473319	0.15
TBCCD1	HsaINT0164418	0.202981	0.15	NA	NA
TCTN3	HsaINT0165235	-0.424979	0.24	-0.41954	0.25
TEX14	HsaINT0165968	NA	NA	-0.696027	0.44
TEX2	HsaINT0165984	0.539748	0.33	NA	NA
TFAP2E	HsaINT0166067	NA	NA	0.430077	0.25
TGFBR1	HsaINT0166369	0.228082	0.17	NA	NA
THADA	HsaINT0166556	0.333375	0.17	NA	NA
THBS1	HsaINT0166636	-0.421341	0.16	-0.522319	0.27
THBS4	HsaINT0166695	0.319225	0.17	NA	NA
THBS4	HsaINT0166703	NA	NA	0.407652	0.23
THSD1P1	HsaINT0166926	NA	NA	-0.292057	0.24
TMEM106A	HsaINT0168242	-0.309681	0.15	NA	NA
TMEM106A	HsaINT0168243	-0.34312	0.23	-0.281025	0.16
TMEM116	HsaINT0168290	NA	NA	0.232647	0.16
TMEM146	HsaINT0168538	0.442438	0.21	NA	NA
TMEM150A	HsaINT0168572	NA	NA	-0.307558	0.2
TMEM184B	HsaINT0168772	0.451605	0.19	NA	NA
TMEM191A	HsaINT0168825	0.265534	0.15	NA	NA
TMEM38A	HsaINT0169067	0.619456	0.44	0.446675	0.22
TMEM43	HsaINT0169120	NA	NA	-0.189984	0.15
TMEM43	HsaINT0169122	-0.230982	0.19	-0.195778	0.15
TMEM49	HsaINT0169167	0.192342	0.17	0.190976	0.16
TMEM88	HsaINT0169465	-0.498334	0.23	NA	NA
TMPRSS13	HsaINT0169663	NA	NA	-0.70905	0.44
TMPRSS13	HsaINT0169667	-0.363413	0.17	NA	NA
TNNT3	HsaINT0170435	NA	NA	-0.299144	0.18
TOM1L1	HsaINT0170761	NA	NA	0.47684	0.17
TOM1L2	HsaINT0170780	0.665128	0.47	NA	NA
TP53I3	HsaINT0171147	-0.34266	0.2	NA	NA
TPO	HsaINT0171380	-0.775718	0.52	NA	NA
TPO	HsaINT0171381	-0.507305	0.25	NA	NA
TRAIP	HsaINT0171809	0.280885	0.16	NA	NA
TRERF1	HsaINT0172102	0.326202	0.16	NA	NA
TRIM17	HsaINT0172177	NA	NA	0.330271	0.18
TRIM58	HsaINT0172459	-0.440704	0.19	NA	NA
TRPC1	HsaINT0172952	0.468029	0.29	NA	NA
TSHR	HsaINT0173667	0.543231	0.29	NA	NA
TSNAXIP1	HsaINT0173732	-0.404719	0.18	NA	NA
TSPAN4	HsaINT0173851	NA	NA	-0.30252	0.16
TTC12	HsaINT0174008	-0.293688	0.18	NA	NA
TTC18	HsaINT0174130	0.37443	0.15	NA	NA
TTC28	HsaINT0174301	0.396781	0.19	NA	NA
TTN	HsaINT0174968	-0.275016	0.17	NA	NA
TTN	HsaINT0174970	-0.334895	0.22	NA	NA
TTN	HsaINT0174975	0.316462	0.15	NA	NA
TTN	HsaINT0174989	NA	NA	-0.431541	0.18
TTN	HsaINT0174998	0.668812	0.43	NA	NA
TTN	HsaINT0175006	-0.767656	0.53	NA	NA
TTN	HsaINT0175009	0.379257	0.17	NA	NA
TTN	HsaINT0175015	NA	NA	-0.269559	0.2
TTN	HsaINT0175021	0.246585	0.17	NA	NA
TTN	HsaINT0175030	0.546764	0.35	NA	NA
TTN	HsaINT0175034	NA	NA	0.283667	0.17
TTN	HsaINT0175036	0.278765	0.15	NA	NA
TTN	HsaINT0175040	0.333247	0.22	NA	NA
TTN	HsaINT0175042	0.287514	0.15	NA	NA
TTN	HsaINT0175045	0.252606	0.15	NA	NA
TTN	HsaINT0175080	-0.926853	0.77	NA	NA
TTN	HsaINT0175095	-0.396987	0.17	NA	NA
TTN	HsaINT0175102	-0.362589	0.19	NA	NA
TTN	HsaINT0175113	-0.517303	0.31	NA	NA
TTN	HsaINT0175117	NA	NA	0.482567	0.29
TTN	HsaINT0175144	0.21822	0.15	NA	NA
TTYH1	HsaINT0175228	NA	NA	-0.279527	0.15
TUBB6	HsaINT0175332	NA	NA	-0.489164	0.29
TUBG2	HsaINT0175379	0.285068	0.21	NA	NA
UAP1L1	HsaINT0175985	-0.34457	0.22	NA	NA
UBE2K	HsaINT0176367	0.259488	0.19	NA	NA
UBE2Q2	HsaINT0176418	-0.369748	0.15	NA	NA
UMPS	HsaINT0177645	0.558427	0.37	NA	NA
USP51	HsaINT0179282	0.442092	0.21	NA	NA
USP54	HsaINT0179316	-0.505137	0.23	NA	NA
VIPR2	HsaINT0180264	0.527162	0.29	NA	NA
VIPR2	HsaINT0180265	NA	NA	-0.396774	0.23
VIPR2	HsaINT0180266	NA	NA	0.454212	0.21
VPS53	HsaINT0180926	0.340513	0.2	NA	NA
VSIG10	HsaINT0181058	NA	NA	-0.41413	0.18
VSIG2	HsaINT0181070	NA	NA	-0.409524	0.18
VTN	HsaINT0181146	-0.591885	0.29	NA	NA
VWA3A	HsaINT0181175	0.481854	0.3	NA	NA
VWA3A	HsaINT0181182	0.621456	0.38	NA	NA
VWA3A	HsaINT0181184	-0.588818	0.33	NA	NA
VWA3A	HsaINT0181185	0.544752	0.31	NA	NA
VWA3A	HsaINT0181186	0.516079	0.22	0.448538	0.19
VWDE	HsaINT0181304	-0.569761	0.38	NA	NA
WBP2NL	HsaINT0181527	-0.288678	0.15	NA	NA
WDR19	HsaINT0181902	-0.207828	0.15	NA	NA
WDR67	HsaINT0182483	NA	NA	-0.38699	0.2
WDR86	HsaINT0182695	NA	NA	-0.415044	0.22
WDR90	HsaINT0182723	NA	NA	0.279633	0.17
WDR90	HsaINT0182741	0.257644	0.16	NA	NA
YBX2	HsaINT0184105	0.47468	0.22	NA	NA
ZBED2	HsaINT0184515	NA	NA	-0.412413	0.35
ZDBF2	HsaINT0185095	0.393012	0.2	NA	NA
ZDHHC8	HsaINT0185291	0.200425	0.16	0.206167	0.17
ZFHX3	HsaINT0185459	-0.381804	0.21	NA	NA
ZFYVE27	HsaINT0185761	-0.567519	0.35	NA	NA
ZFYVE28	HsaINT0185772	NA	NA	0.407254	0.18
ZFYVE9	HsaINT0185794	NA	NA	-0.401035	0.2
ZHX3	HsaINT0185826	NA	NA	-0.408128	0.25
ZNF132	HsaINT0186192	NA	NA	-0.466585	0.32
ZNF154	HsaINT0186265	0.490412	0.33	NA	NA
ZNF250	HsaINT0186588	-0.342721	0.15	NA	NA
ZNF341	HsaINT0186974	NA	NA	-0.238784	0.15
ZNF426	HsaINT0187200	0.275092	0.16	NA	NA
ZNF434	HsaINT0187234	0.294326	0.23	NA	NA
ZNF462	HsaINT0187334	NA	NA	0.405983	0.2
ZNF473	HsaINT0187360	0.357229	0.22	NA	NA
ZNF502	HsaINT0187431	0.369584	0.18	NA	NA
ZNF512B	HsaINT0187469	-0.321137	0.15	NA	NA
ZNF518A	HsaINT0187505	-0.263615	0.17	NA	NA
ZNF527	HsaINT0187531	0.313974	0.19	NA	NA
ZNF532	HsaINT0187549	-0.518578	0.29	NA	NA
ZNF554	HsaINT0187623	-0.351881	0.19	NA	NA
ZNF578	HsaINT0187733	0.389844	0.17	NA	NA
ZNF584	HsaINT0187750	-0.40217	0.25	NA	NA
ZNF610	HsaINT0187844	0.514629	0.26	NA	NA
ZNF620	HsaINT0187900	NA	NA	-0.544848	0.26
ZNF623	HsaINT0187914	NA	NA	-0.274529	0.17
ZNF683	HsaINT0188112	NA	NA	-0.329136	0.15
ZNF69	HsaINT0188132	0.196384	0.15	NA	NA
ZNF691	HsaINT0188133	-0.287652	0.21	NA	NA
ZNF771	HsaINT0188342	NA	NA	0.381133	0.17
ZNF772	HsaINT0188345	NA	NA	-0.336998	0.15
ZNF793	HsaINT0188423	0.362231	0.22	NA	NA
ZNF793	HsaINT0188429	NA	NA	-0.43534	0.26
ZNF836	HsaINT0188524	0.264933	0.19	NA	NA
ZNF879	HsaINT0188576	0.37342	0.15	NA	NA
ZNF90	HsaINT0188594	0.67864	0.52	NA	NA
NA*	HsaEX0000037 §	-0.342604	0.24	NA	NA
ABCA10	HsaEX0000241	-0.592334	0.35	NA	NA
ABCC2	HsaEX0000431	0.284062	0.18	NA	NA
ABCG2	HsaEX0000576	NA	NA	0.509456	0.29
ABHD11	HsaEX0000593	0.281166	0.18	NA	NA
ABL2	HsaEX0000712	-0.272667	0.16	NA	NA
AC002480.3	HsaEX0000780	NA	NA	0.514493	0.35
AC007952.7	HsaEX0000946	-0.677129	0.51	NA	NA
AC007956.1	HsaEX0000947	NA	NA	0.370827	0.19
AC008969.1	HsaEX0000979	0.433792	0.27	NA	NA
AC009948.3	HsaEX0001015	NA	NA	0.314109	0.2
AC009948.3	HsaEX0001016	NA	NA	0.619135	0.39
AC009948.3	HsaEX0001017	NA	NA	0.426384	0.22
AC012307.3	HsaEX0001065	-0.536999	0.32	NA	NA
AC018816.3	HsaEX0001153	0.23713	0.15	NA	NA
AC021593.2	HsaEX0001172	-0.228657	0.18	NA	NA
AC021860.1	HsaEX0001178	NA	NA	0.349805	0.21
AC027667.1	HsaEX0001230	0.370185	0.23	NA	NA
AC092295.7	HsaEX0001393	-0.358307	0.18	NA	NA
AC093063.1	HsaEX0001412	0.363393	0.15	NA	NA
AC131097.3	HsaEX0001600	0.237134	0.15	NA	NA
AC138035.1	HsaEX0001637	0.296181	0.21	NA	NA
ACE	HsaEX0001892	0.274214	0.15	NA	NA
ADAL	HsaEX0002254	0.250705	0.16	NA	NA
ADAM22	HsaEX0002312	NA	NA	-0.399876	0.16
ADAMTS13	HsaEX0002425	0.31138	0.19	NA	NA
ADAMTS6	HsaEX0002539	-0.425959	0.17	NA	NA
ADAMTSL5	HsaEX0002608	NA	NA	0.592123	0.32
ADAP2	HsaEX0002616	NA	NA	-0.473342	0.17
ADARB1	HsaEX0002643	NA	NA	-0.434989	0.26
AGBL2	HsaEX0003044	0.253895	0.15	NA	NA
AGBL2	HsaEX0003050	NA	NA	-0.302219	0.18
AGBL2	HsaEX0003053	0.258892	0.17	NA	NA
AKD1	HsaEX0003434	NA	NA	0.299072	0.15
AKR1E2	HsaEX0003474	NA	NA	-0.322851	0.2
AL031768.1	HsaEX0003509	0.319808	0.21	NA	NA
ALS2CR12	HsaEX0003875	NA	NA	0.296753	0.16
AMDHD1	HsaEX0003920	NA	NA	0.538719	0.33
AMIGO2	HsaEX0003940	-0.294513	0.2	NA	NA
AMN1	HsaEX0003957	NA	NA	-0.268444	0.16
ANKRD18A	HsaEX0004365	0.393008	0.28	NA	NA
ANKRD20A5	HsaEX0004373	-0.495998	0.38	NA	NA
ANKRD20A5	HsaEX0004374	-0.492149	0.26	NA	NA
ANKRD31	HsaEX0004458	-0.54427	0.27	NA	NA
ANKRD6	HsaEX0004544	0.319308	0.2	NA	NA
AP000346.2	HsaEX0004787	-0.248809	0.15	NA	NA
AP000769.1	HsaEX0004795	-0.41999	0.23	NA	NA
AP3S1	HsaEX0004983	0.422796	0.21	NA	NA
APH1A	HsaEX0005121	NA	NA	0.493664	0.23
APLF	HsaEX0005138	-0.255724	0.19	NA	NA
ARHGEF1	HsaEX0005556	0.179905	0.16	NA	NA
ARL16	HsaEX0005863	0.233465	0.19	NA	NA
ARMC2	HsaEX0005900	-0.356818	0.22	NA	NA
ARMC2	HsaEX0005905	NA	NA	-0.326797	0.15
ARMCX4	HsaEX0005965	-0.320609	0.17	NA	NA
ARNTL2	HsaEX0006022	0.36238	0.25	NA	NA
ARRDC4	HsaEX0006058	0.297835	0.17	NA	NA
ASAH2C	HsaEX0006143	NA	NA	-0.282804	0.19
ATL3	HsaEX0006698	0.300878	0.22	NA	NA
ATP13A4	HsaEX0006843	-0.610469	0.39	NA	NA
ATP5B	HsaEX0006926	-0.559456	0.36	NA	NA
ATP7B	HsaEX0007041	NA	NA	-0.459442	0.23
ATP7B	HsaEX0007042	NA	NA	-0.411373	0.15
ATP7B	HsaEX0007043	NA	NA	-0.399203	0.24
ATXN2L	HsaEX0007272	NA	NA	-0.295904	0.25
AVIL	HsaEX0007363	0.307087	0.17	NA	NA
AVIL	HsaEX0007367	-0.414999	0.18	NA	NA
BAG4	HsaEX0007545	NA	NA	0.216779	0.15
BAI1	HsaEX0007558	NA	NA	-0.452687	0.2
BAIAP2L2	HsaEX0007597	NA	NA	0.449974	0.25
BAIAP2L2	HsaEX0007598	NA	NA	0.437239	0.27
BAZ2B	HsaEX0007736	NA	NA	0.289676	0.22
BCL2L1	HsaEX0007883	NA	NA	-0.422842	0.19
BCL2L14	HsaEX0007904	-0.407096	0.2	NA	NA
BICD1	HsaEX0008082	0.456759	0.24	NA	NA
BLCAP	HsaEX0008156	NA	NA	-0.376442	0.17
BRCA1	HsaEX0008383	0.301143	0.15	NA	NA
BRSK1	HsaEX0008507	0.373264	0.21	NA	NA
BTBD3	HsaEX0008642	-0.354441	0.16	-0.347508	0.19
C10orf68	HsaEX0008867	-0.36751	0.15	NA	NA
C10orf68	HsaEX0008874	0.254739	0.16	NA	NA
C10orf68	HsaEX0008875	-0.347032	0.21	NA	NA
C10orf68	HsaEX0008878	NA	NA	0.246271	0.16
C11orf30	HsaEX0008976	0.236041	0.17	NA	NA
C11orf61	HsaEX0009022	0.285546	0.17	NA	NA
C11orf73	HsaEX0009057	-0.281413	0.2	NA	NA
C11orf74	HsaEX0009064	0.350756	0.2	NA	NA
C12orf42	HsaEX0009181	NA	NA	0.440584	0.18
C14orf148	HsaEX0009410	-0.364488	0.17	NA	NA
C14orf17	HsaEX0009453	-0.301196	0.21	NA	NA
C14orf182	HsaEX0009466	-0.224302	0.16	NA	NA
C16orf46	HsaEX0009626	NA	NA	0.41448	0.16
C16orf46	HsaEX0009628	NA	NA	-0.412658	0.23
C17orf53	HsaEX0009767	0.302877	0.17	NA	NA
C17orf53	HsaEX0009769	0.317151	0.15	NA	NA
C17orf57	HsaEX0009786	NA	NA	-0.398013	0.24
C18orf45	HsaEX0009895	-0.4088	0.22	NA	NA
C18orf45	HsaEX0009903	NA	NA	0.493728	0.28
C19orf57	HsaEX0010019	-0.452356	0.17	NA	NA
C1orf113	HsaEX0010118	-0.343731	0.24	NA	NA
C1orf203	HsaEX0010226	NA	NA	0.420559	0.28
C20orf194	HsaEX0010465	-0.270557	0.17	NA	NA
C20orf29	HsaEX0010491	0.251371	0.15	NA	NA
C21orf58	HsaEX0010562	NA	NA	0.436942	0.25
C2orf34	HsaEX0010687	NA	NA	0.25009	0.17
C2orf84	HsaEX0010798	-0.294203	0.2	NA	NA
C4orf21	HsaEX0010988	-0.412848	0.32	NA	NA
C5	HsaEX0011077	-0.530861	0.33	NA	NA
C5	HsaEX0011085	NA	NA	-0.273099	0.18
C6orf163	HsaEX0011263	NA	NA	0.391052	0.23
C6orf182	HsaEX0011308	0.485943	0.34	NA	NA
C6orf70	HsaEX0011368	0.292275	0.16	NA	NA
C7orf25	HsaEX0011410	NA	NA	0.466296	0.2
C8orf83	HsaEX0011570	0.313619	0.21	NA	NA
C9orf100	HsaEX0011576	0.346078	0.17	NA	NA
C9orf3	HsaEX0011649	NA	NA	-0.397088	0.17
C9orf3	HsaEX0011654	-0.530105	0.36	NA	NA
C9orf3	HsaEX0011656	-0.306509	0.16	NA	NA
C9orf96	HsaEX0011786	0.385105	0.19	NA	NA
C9orf96	HsaEX0011787	0.478756	0.23	NA	NA
CAPS2	HsaEX0012412	0.529909	0.27	NA	NA
CATSPER2	HsaEX0012661	-0.478657	0.25	NA	NA
CATSPER3	HsaEX0012663	0.435774	0.19	NA	NA
CATSPER3	HsaEX0012664	NA	NA	-0.542045	0.36
CATSPERB	HsaEX0012671	NA	NA	0.572496	0.37
CATSPERB	HsaEX0012672	0.284375	0.16	NA	NA
CCBL1	HsaEX0012839	-0.304755	0.17	NA	NA
CCDC102B	HsaEX0012868	0.453519	0.24	NA	NA
CCDC136	HsaEX0013009	0.507423	0.32	NA	NA
CCDC136	HsaEX0013012	0.538965	0.37	NA	NA
CCDC136	HsaEX0013013	0.444948	0.25	NA	NA
CCDC138	HsaEX0013028	-0.288123	0.2	NA	NA
CCDC157	HsaEX0013113	-0.341815	0.22	NA	NA
CCDC162	HsaEX0013135	NA	NA	0.551107	0.31
CCDC18	HsaEX0013146	0.416772	0.33	0.405211	0.28
CCDC24	HsaEX0013181	-0.500067	0.38	NA	NA
CCDC30	HsaEX0013201	0.358994	0.17	NA	NA
CCDC91	HsaEX0013547	NA	NA	-0.388247	0.2
CDC25C	HsaEX0014017	0.435508	0.3	NA	NA
CDH23	HsaEX0014195	0.41813	0.22	NA	NA
CDHR3	HsaEX0014240	0.381672	0.22	NA	NA
CDK11A	HsaEX0014263	NA	NA	-0.290192	0.17
CDKN2BAS	HsaEX0014417	0.362417	0.15	NA	NA
CELSR3	HsaEX0014563	NA	NA	0.251863	0.16
CENPI	HsaEX0014594	0.312655	0.16	NA	NA
CENPP	HsaEX0014639	NA	NA	0.268317	0.17
CENPP	HsaEX0014641	NA	NA	0.237432	0.16
CENPV	HsaEX0014648	NA	NA	-0.387004	0.23
CHODL	HsaEX0015267	NA	NA	0.456408	0.21
CLCN2	HsaEX0015532	NA	NA	0.347455	0.17
CLCN2	HsaEX0015533	NA	NA	0.295583	0.15
COL9A2	HsaEX0016690	0.246999	0.17	NA	NA
COPZ2	HsaEX0016805	NA	NA	0.334178	0.15
CPEB3	HsaEX0016970	NA	NA	-0.33509	0.23
CPNE2	HsaEX0016994	NA	NA	-0.358289	0.23
CRAMP1L	HsaEX0017127	NA	NA	0.216978	0.16
CSAD	HsaEX0017414	0.220133	0.17	0.213904	0.16
CSF2RA	HsaEX0017444	NA	NA	-0.385454	0.15
CSNK1G3	HsaEX0017557	-0.218177	0.15	NA	NA
CTC-358I24.1	HsaEX0017702	0.404327	0.18	NA	NA
CTD-2201I18.1	HsaEX0017744	0.264173	0.16	NA	NA
CTD-2201I18.1	HsaEX0017745	0.339192	0.25	NA	NA
CTD-2353F22.1	HsaEX0017763	NA	NA	-0.520607	0.23
CTD-2666L21.1	HsaEX0017786	0.41739	0.17	NA	NA
CXorf57	HsaEX0018155	-0.318637	0.18	NA	NA
CYTSA	HsaEX0018371	0.232354	0.16	0.232304	0.18
DCTD	HsaEX0018760	0.202497	0.16	NA	NA
DEPDC4	HsaEX0019246	-0.407122	0.16	NA	NA
DGKZ	HsaEX0019473	0.347777	0.23	NA	NA
DLG5	HsaEX0019906	-0.384941	0.2	NA	NA
DNAH1	HsaEX0020100	NA	NA	0.240485	0.15
DNAH6	HsaEX0020203	-0.395851	0.18	NA	NA
DNM3	HsaEX0020461	NA	NA	-0.488269	0.25
DNMT3B	HsaEX0020496	-0.446336	0.21	NA	NA
DOCK3	HsaEX0020571	-0.357158	0.16	NA	NA
DOCK3	HsaEX0020581	0.535312	0.28	NA	NA
DPY19L2	HsaEX0020897	0.421857	0.31	NA	NA
DPY19L2P2	HsaEX0020904	NA	NA	0.39307	0.23
DST	HsaEX0021045	NA	NA	0.281575	0.19
DST	HsaEX0021046	0.227592	0.15	NA	NA
DYRK3	HsaEX0021348	NA	NA	-0.309632	0.17
DYX1C1	HsaEX0021369	-0.3496	0.2	NA	NA
EDA	HsaEX0021542	0.404626	0.27	NA	NA
EML5	HsaEX0022385	NA	NA	-0.491945	0.33
EPB41L3	HsaEX0022667	-0.308442	0.17	NA	NA
EPB49	HsaEX0022709	-0.71604	0.63	NA	NA
EPS8L1	HsaEX0022877	0.384838	0.18	NA	NA
ERI2	HsaEX0023066	-0.386681	0.2	NA	NA
ERICH1	HsaEX0023082	0.363657	0.2	NA	NA
ESR1	HsaEX0023194	0.413184	0.26	NA	NA
FAAH	HsaEX0023660	0.345671	0.17	NA	NA
FAM135A	HsaEX0023975	0.247921	0.16	NA	NA
FAM179A	HsaEX0024227	-0.302281	0.18	NA	NA
FAM18B2	HsaEX0024300	0.383053	0.25	NA	NA
FAM45A	HsaEX0024459	NA	NA	-0.243314	0.18
FAM54B	HsaEX0024515	-0.25023	0.16	NA	NA
FAM66E	HsaEX0024586	0.293831	0.18	NA	NA
FANCC	HsaEX0024749	0.322675	0.2	NA	NA
FANK1	HsaEX0024855	NA	NA	-0.700964	0.47
FAR2	HsaEX0024881	NA	NA	0.263516	0.16
FBXO15	HsaEX0025229	0.36407	0.17	NA	NA
FER1L4	HsaEX0025554	NA	NA	-0.466239	0.21
FES	HsaEX0025579	0.382433	0.15	NA	NA
FGD2	HsaEX0025597	NA	NA	-0.405568	0.17
FGGY	HsaEX0025711	NA	NA	0.359351	0.22
FKBP1B	HsaEX0025843	NA	NA	-0.435506	0.16
FKBP7	HsaEX0025863	-0.361229	0.22	NA	NA
FKRP	HsaEX0025866	0.675052	0.44	NA	NA
FMO4	HsaEX0026070	0.37768	0.26	NA	NA
FMO4	HsaEX0026073	NA	NA	0.312511	0.19
FMO4	HsaEX0026074	NA	NA	0.34065	0.22
FUK	HsaEX0026589	0.21307	0.15	NA	NA
GABARAPL1	HsaEX0026744	0.293952	0.16	NA	NA
GATS	HsaEX0027122	NA	NA	0.250976	0.15
GGCX	HsaEX0027391	NA	NA	0.270049	0.16
GLB1L3	HsaEX0027573	NA	NA	0.238128	0.15
GLB1L3	HsaEX0027574	NA	NA	0.40981	0.24
GLB1L3	HsaEX0027575	NA	NA	0.35384	0.18
GLIPR1L2	HsaEX0027623	NA	NA	-0.529278	0.23
GLS2	HsaEX0027689	0.285312	0.18	NA	NA
GLS2	HsaEX0027691	0.255734	0.15	NA	NA
GLUD1	HsaEX0027745	NA	NA	-0.403713	0.24
GPAT2	HsaEX0028095	NA	NA	-0.318074	0.17
GRAMD1B	HsaEX0028507	-0.195163	0.15	NA	NA
GRB10	HsaEX0028547	NA	NA	-0.48031	0.21
GRB10	HsaEX0028562	NA	NA	-0.459212	0.26
GS1-124K5.2	HsaEX0028792	-0.26339	0.19	NA	NA
GYG2P	HsaEX0029137	NA	NA	-0.459301	0.2
HAP1	HsaEX0029242	0.381773	0.24	NA	NA
HCFC2	HsaEX0029339	-0.240085	0.16	NA	NA
HDX	HsaEX0029481	NA	NA	0.340199	0.19
HECTD2	HsaEX0029608	-0.597245	0.29	NA	NA
HERC2	HsaEX0029753	-0.222698	0.15	NA	NA
HSD11B1L	HsaEX0030515	NA	NA	0.347838	0.21
HSD11B1L	HsaEX0030518	0.374368	0.21	NA	NA
HSD17B14	HsaEX0030533	-0.297266	0.16	NA	NA
IFT172	HsaEX0031034	0.639541	0.55	NA	NA
IKZF2	HsaEX0031267	NA	NA	-0.493655	0.33
IMPDH1	HsaEX0031610	0.305426	0.19	NA	NA
IQCE	HsaEX0032098	0.265364	0.15	NA	NA
ISPD	HsaEX0032268	0.479023	0.17	NA	NA
ITGAX	HsaEX0032430	NA	NA	0.310296	0.17
ITSN1	HsaEX0032618	NA	NA	-0.435213	0.17
KANK1	HsaEX0032840	-0.474876	0.19	NA	NA
KCNH3	HsaEX0032976	0.471826	0.26	NA	NA
KCTD17	HsaEX0033162	0.20143	0.15	NA	NA
KIAA0802	HsaEX0033799	NA	NA	0.68607	0.41
KIAA0895	HsaEX0033814	NA	NA	0.306005	0.16
KIAA1328	HsaEX0034037	-0.428388	0.25	NA	NA
KIF21A	HsaEX0034511	-0.226731	0.15	NA	NA
KIF24	HsaEX0034545	-0.389616	0.17	NA	NA
KIF27	HsaEX0034576	0.370675	0.21	NA	NA
KLHL17	HsaEX0034771	NA	NA	-0.261647	0.17
KLHL8	HsaEX0034876	-0.295093	0.2	NA	NA
KLRD1	HsaEX0034919	NA	NA	-0.280776	0.18
LARP1B	HsaEX0035363	0.307018	0.16	NA	NA
LIF	HsaEX0035758	NA	NA	-0.251994	0.18
LONRF3	HsaEX0036133	NA	NA	-0.52758	0.38
LOXL2	HsaEX0036152	NA	NA	0.261075	0.16
LPAR2	HsaEX0036178	NA	NA	-0.281147	0.22
LPAR2	HsaEX0036179	NA	NA	-0.331656	0.28
LPHN1	HsaEX0036224	-0.452064	0.22	NA	NA
LPHN1	HsaEX0036226	NA	NA	0.250027	0.15
LPP	HsaEX0036293	NA	NA	0.269488	0.15
LRP2BP	HsaEX0036429	NA	NA	-0.42557	0.28
LRRC17	HsaEX0036531	NA	NA	0.536399	0.31
LRRC20	HsaEX0036540	0.348743	0.19	NA	NA
LRRC27	HsaEX0036552	-0.256616	0.17	NA	NA
LRRC34	HsaEX0036569	0.313269	0.17	NA	NA
LRRC63	HsaEX0036679	0.246473	0.15	NA	NA
LRRC69	HsaEX0036689	NA	NA	0.312481	0.17
LUC7L2	HsaEX0036994	0.325735	0.19	NA	NA
LYSMD4	HsaEX0037090	0.31338	0.23	NA	NA
LZTFL1	HsaEX0037123	NA	NA	0.206528	0.15
MACF1	HsaEX0037172	0.200365	0.17	NA	NA
MACF1	HsaEX0037173	0.181261	0.15	NA	NA
MAPKAPK5	HsaEX0037824	NA	NA	-0.422512	0.27
MATR3	HsaEX0038048	0.236346	0.15	NA	NA
MATR3	HsaEX0038052	-0.436438	0.22	NA	NA
MBOAT2	HsaEX0038131	NA	NA	0.439368	0.21
MBOAT2	HsaEX0038132	NA	NA	-0.453541	0.18
MCTP2	HsaEX0038338	0.237305	0.17	NA	NA
MCTP2	HsaEX0038339	0.331526	0.15	NA	NA
ME3	HsaEX0038478	NA	NA	-0.592067	0.35
MED15	HsaEX0038591	NA	NA	0.43096	0.24
MEF2B	HsaEX0038697	NA	NA	0.402862	0.2
MKI67	HsaEX0039360	0.212668	0.15	NA	NA
MMRN1	HsaEX0039687	0.453005	0.22	NA	NA
MRPL3	HsaEX0040118	NA	NA	-0.40257	0.25
MRRF	HsaEX0040215	NA	NA	0.271964	0.17
MTHFD2L	HsaEX0040502	NA	NA	0.307776	0.22
MTMR11	HsaEX0040567	-0.473116	0.23	NA	NA
MTMR8	HsaEX0040648	NA	NA	-0.263691	0.16
MYEF2	HsaEX0040938	-0.188724	0.15	NA	NA
MYO5C	HsaEX0041212	0.308598	0.17	NA	NA
MYO5C	HsaEX0041216	0.410513	0.16	NA	NA
NAV1	HsaEX0041744	NA	NA	-0.514933	0.32
NCF1B	HsaEX0041989	-0.404185	0.18	NA	NA
NCRNA00278	HsaEX0042183	NA	NA	0.382798	0.18
NEIL1	HsaEX0042447	0.374828	0.15	NA	NA
NEURL1B	HsaEX0042613	NA	NA	0.475238	0.2
NEXN	HsaEX0042628	-0.251409	0.15	NA	NA
NHEDC1	HsaEX0042858	-0.367796	0.16	NA	NA
NHSL2	HsaEX0042894	NA	NA	0.427997	0.15
NIPAL2	HsaEX0042966	NA	NA	0.502955	0.27
NPL	HsaEX0043581	0.279618	0.17	NA	NA
NUMA1	HsaEX0044209	NA	NA	0.201984	0.18
OBSCN	HsaEX0044539	NA	NA	0.322769	0.18
ODZ1	HsaEX0044622	0.5765	0.38	NA	NA
OSBP2	HsaEX0044857	0.423401	0.21	NA	NA
OSBP2	HsaEX0044860	NA	NA	0.425058	0.15
OSTC	HsaEX0044991	0.264873	0.19	NA	NA
P2RX5	HsaEX0045089	0.424952	0.29	NA	NA
P4HA2	HsaEX0045119	NA	NA	0.359561	0.17
PARP11	HsaEX0045567	NA	NA	0.225941	0.16
PCBP3	HsaEX0045794	0.382732	0.17	NA	NA
PCBP3	HsaEX0045796	0.362054	0.15	NA	NA
PCSK5	HsaEX0046050	0.481677	0.23	NA	NA
PEX11A	HsaEX0046628	NA	NA	0.370651	0.25
PEX7	HsaEX0046688	0.247559	0.16	NA	NA
PFKM	HsaEX0046753	-0.283858	0.16	NA	NA
PHF5A	HsaEX0047063	NA	NA	-0.345955	0.15
PIGC	HsaEX0047395	NA	NA	-0.45964	0.15
PIK3R3	HsaEX0047600	0.313387	0.17	NA	NA
PLAGL1	HsaEX0048009	-0.534624	0.36	NA	NA
PLB1	HsaEX0048037	0.47001	0.21	NA	NA
PLXNA4	HsaEX0048554	-0.77189	0.53	NA	NA
PLXNB1	HsaEX0048578	-0.332123	0.17	NA	NA
POLN	HsaEX0048994	-0.396268	0.16	NA	NA
POLN	HsaEX0048999	NA	NA	-0.408016	0.19
PPARA	HsaEX0049279	-0.272611	0.15	NA	NA
PPARG	HsaEX0049292	NA	NA	0.468031	0.22
PRG4	HsaEX0050030	0.547895	0.33	NA	NA
PRKX	HsaEX0050247	NA	NA	0.356865	0.15
PROK2	HsaEX0050320	0.598189	0.35	NA	NA
PRPSAP2	HsaEX0050406	NA	NA	-0.555119	0.33
PRSS16	HsaEX0050476	-0.479346	0.22	NA	NA
PRSS36	HsaEX0050485	0.389214	0.17	NA	NA
PTCD2	HsaEX0050741	0.234349	0.15	NA	NA
PTCH1	HsaEX0050759	0.314529	0.15	NA	NA
PTCH2	HsaEX0050765	NA	NA	0.434533	0.27
RAD54L	HsaEX0051942	NA	NA	-0.277369	0.17
RALGPS1	HsaEX0052089	NA	NA	0.315244	0.16
RAPSN	HsaEX0052308	-0.512379	0.25	NA	NA
RASIP1	HsaEX0052467	0.550313	0.29	NA	NA
RCBTB2	HsaEX0052871	0.341612	0.23	NA	NA
RDM1	HsaEX0052950	0.35372	0.15	NA	NA
RFPL3S	HsaEX0053195	0.46578	0.32	NA	NA
RFX2	HsaEX0053240	-0.382525	0.22	NA	NA
RFX2	HsaEX0053241	NA	NA	0.302297	0.2
RFX3	HsaEX0053248	NA	NA	0.279186	0.16
RFX8	HsaEX0053284	NA	NA	0.508117	0.27
RFX8	HsaEX0053285	NA	NA	0.493517	0.3
RNF212	HsaEX0054037	NA	NA	-0.395139	0.23
RP1-101K10.6	HsaEX0054278	NA	NA	-0.380456	0.2
RP1-1J6.2	HsaEX0054302	NA	NA	-0.412249	0.26
RP1-309F20.3	HsaEX0054318	NA	NA	0.520555	0.32
RP11-120D5.1	HsaEX0054399	NA	NA	-0.453778	0.21
RP11-134O21.1	HsaEX0054424	0.454957	0.22	NA	NA
RP11-264J9.1	HsaEX0054565	0.519638	0.23	NA	NA
RP11-267N12.3	HsaEX0054570	NA	NA	0.290675	0.18
RP11-295K2.3	HsaEX0054596	NA	NA	-0.520553	0.29
RP11-308D16.4	HsaEX0054605	-0.333319	0.16	NA	NA
RP11-308D16.4	HsaEX0054608	-0.694703	0.41	NA	NA
RP11-314N13.4	HsaEX0054624	0.291026	0.16	NA	NA
RP11-342M1.3	HsaEX0054673	0.534339	0.31	NA	NA
RP11-420A23.1	HsaEX0054775	-0.384059	0.18	NA	NA
RP11-420A23.1	HsaEX0054776	-0.485229	0.18	NA	NA
RP11-447D11.2	HsaEX0054848	0.556204	0.34	NA	NA
RP11-453F18__B.1	HsaEX0054863	-0.479839	0.25	NA	NA
RP11-453F18__B.1	HsaEX0054865	0.394763	0.25	NA	NA
RP11-460N20.5	HsaEX0054879	0.345363	0.16	NA	NA
RP11-465B22.3	HsaEX0054890	0.437865	0.28	NA	NA
RP11-50E11.3	HsaEX0054950	-0.344446	0.18	NA	NA
RP11-551L14.1	HsaEX0055012	-0.397519	0.16	NA	NA
RP11-58B17.1	HsaEX0055048	0.489392	0.25	NA	NA
RP11-617D20.1	HsaEX0055055	NA	NA	0.366131	0.17
RP11-81N13.1	HsaEX0055157	-0.436138	0.3	NA	NA
RP4-756H11.3	HsaEX0055323	0.354257	0.16	NA	NA
RP4-798C17.6	HsaEX0055338	NA	NA	0.476489	0.35
RP5-842K24.2	HsaEX0055365	0.503039	0.31	NA	NA
RPL23AP53	HsaEX0055498	0.239937	0.16	NA	NA
RPP40	HsaEX0055543	NA	NA	-0.214756	0.15
RRN3P3	HsaEX0055751	-0.316224	0.19	NA	NA
RTN4RL1	HsaEX0055889	NA	NA	-0.48259	0.26
SAMD3	HsaEX0056148	NA	NA	-0.480207	0.25
SCMH1	HsaEX0056511	NA	NA	-0.261362	0.16
SCNN1D	HsaEX0056603	-0.438794	0.24	NA	NA
SCNN1D	HsaEX0056604	-0.40711	0.18	NA	NA
SEMA4F	HsaEX0057120	0.287556	0.18	NA	NA
SEPT10	HsaEX0057255	0.485742	0.25	NA	NA
SH3BGR	HsaEX0057944	-0.394497	0.24	NA	NA
SHF	HsaEX0058178	-0.422181	0.22	NA	NA
SIDT1	HsaEX0058258	NA	NA	0.210273	0.15
SLC16A6	HsaEX0058733	NA	NA	0.36608	0.15
SLC22A5	HsaEX0058906	NA	NA	-0.283905	0.15
SLC25A23	HsaEX0059042	0.337324	0.19	NA	NA
SLC37A4	HsaEX0059509	0.326136	0.17	NA	NA
SLC43A2	HsaEX0059699	-0.371627	0.19	NA	NA
SLC44A3	HsaEX0059729	-0.336243	0.19	NA	NA
SLC4A8	HsaEX0059851	0.269718	0.15	NA	NA
SLC7A8	HsaEX0060000	-0.23848	0.15	NA	NA
SLC9A3	HsaEX0060032	NA	NA	-0.382799	0.21
SLC9A5	HsaEX0060054	-0.349667	0.19	NA	NA
SLC9A7	HsaEX0060062	NA	NA	0.394153	0.28
SNED1	HsaEX0060672	NA	NA	-0.596013	0.43
SNX19	HsaEX0060830	NA	NA	0.25941	0.19
SPAG16	HsaEX0061144	0.431614	0.16	NA	NA
SPAG16	HsaEX0061145	0.520836	0.28	NA	NA
SPATA1	HsaEX0061210	0.479775	0.23	NA	NA
SPATA13	HsaEX0061212	NA	NA	-0.289029	0.15
SPATA18	HsaEX0061223	NA	NA	-0.510779	0.28
SPTAN1	HsaEX0061551	0.17005	0.15	NA	NA
SRGAP3	HsaEX0061724	-0.465816	0.23	NA	NA
SRPX	HsaEX0061772	NA	NA	0.463534	0.23
ST6GALNAC1	HsaEX0062028	0.318362	0.22	NA	NA
ST8SIA1	HsaEX0062084	-0.446146	0.29	NA	NA
ST8SIA6	HsaEX0062099	0.366835	0.22	NA	NA
STAT2	HsaEX0062329	NA	NA	0.173498	0.15
STAT2	HsaEX0062330	NA	NA	0.196946	0.17
SUCLA2	HsaEX0062821	-0.367162	0.19	NA	NA
SUDS3	HsaEX0062829	-0.409297	0.16	NA	NA
SUPT3H	HsaEX0062930	0.30419	0.21	NA	NA
SYDE2	HsaEX0063114	0.395953	0.24	NA	NA
SYP	HsaEX0063241	0.388706	0.23	NA	NA
TCEA1	HsaEX0064107	-0.428795	0.17	-0.525638	0.31
TEC	HsaEX0064392	0.564713	0.28	NA	NA
TET1	HsaEX0064522	-0.528255	0.29	NA	NA
TEX10	HsaEX0064542	0.236409	0.17	NA	NA
TIMD4	HsaEX0064974	0.298074	0.16	NA	NA
TIRAP	HsaEX0065021	NA	NA	0.34433	0.25
TLR5	HsaEX0065164	0.476065	0.17	NA	NA
TMEM104	HsaEX0065355	-0.225898	0.16	NA	NA
TMEM177	HsaEX0065601	NA	NA	0.309102	0.16
TMOD3	HsaEX0066054	-0.384306	0.18	NA	NA
TNFSF4	HsaEX0066229	NA	NA	0.270596	0.18
TPTE2	HsaEX0066764	-0.471574	0.25	NA	NA
TRIM16	HsaEX0067035	NA	NA	0.391255	0.26
TRIM5	HsaEX0067152	NA	NA	0.335022	0.29
TRIM66	HsaEX0067179	NA	NA	-0.260842	0.16
TRIM69	HsaEX0067194	0.252522	0.18	NA	NA
TRPC3	HsaEX0067373	NA	NA	-0.408171	0.17
TSGA10	HsaEX0067561	NA	NA	0.395927	0.21
TSNARE1	HsaEX0067590	NA	NA	-0.450273	0.16
TTC16	HsaEX0067785	-0.440816	0.25	NA	NA
TTC18	HsaEX0067808	-0.503396	0.32	NA	NA
TTC26	HsaEX0067877	-0.305423	0.16	NA	NA
TTLL11	HsaEX0068061	-0.681704	0.42	NA	NA
TTLL13	HsaEX0068072	NA	NA	0.306742	0.15
TUBG2	HsaEX0068322	0.270414	0.17	NA	NA
UBE2E2	HsaEX0068738	0.303266	0.16	NA	NA
UQCC	HsaEX0069478	0.545577	0.46	NA	NA
UQCC	HsaEX0069479	0.42286	0.38	NA	NA
USP10	HsaEX0069569	-0.380256	0.21	NA	NA
USP10	HsaEX0069571	0.355847	0.24	NA	NA
VWCE	HsaEX0070794	-0.470327	0.29	NA	NA
WDR31	HsaEX0071060	-0.421892	0.15	NA	NA
WDR78	HsaEX0071372	0.504955	0.28	NA	NA
XPOT	HsaEX0071834	-0.330399	0.17	NA	NA
ZBP1	HsaEX0072079	NA	NA	0.208165	0.15
ZBTB38	HsaEX0072143	NA	NA	0.464267	0.24
ZC3H11A	HsaEX0072216	-0.352085	0.15	NA	NA
ZDHHC20	HsaEX0072505	NA	NA	-0.179134	0.15
ZFP1	HsaEX0072635	0.294187	0.16	NA	NA
ZFP62	HsaEX0072669	-0.23497	0.16	NA	NA
ZIK1	HsaEX0072812	0.340964	0.24	NA	NA
ZNF211	HsaEX0073180	0.247722	0.18	NA	NA
ZNF239	HsaEX0073238	NA	NA	-0.489481	0.21
ZNF252	HsaEX0073262	NA	NA	-0.284371	0.19
ZNF254	HsaEX0073267	0.235046	0.15	NA	NA
ZNF280C	HsaEX0073327	0.223323	0.16	NA	NA
ZNF429	HsaEX0073641	-0.329733	0.22	NA	NA
ZNF44	HsaEX0073694	NA	NA	-0.340017	0.22
ZNF449	HsaEX0073714	0.238542	0.15	NA	NA
ZNF487	HsaEX0073781	-0.496586	0.39	NA	NA
ZNF517	HsaEX0073837	NA	NA	0.350352	0.15
ZNF519	HsaEX0073851	NA	NA	0.389985	0.22
ZNF584	HsaEX0073995	-0.41171	0.3	NA	NA
ZNF625	HsaEX0074080	NA	NA	-0.391181	0.21
ZNF674	HsaEX0074162	-0.596738	0.46	NA	NA
ZNF678	HsaEX0074168	-0.436371	0.25	NA	NA
ZNF681	HsaEX0074177	NA	NA	0.434359	0.24
ZNF681	HsaEX0074178	NA	NA	0.608258	0.44
ZNF683	HsaEX0074184	0.389822	0.17	NA	NA
ZNF691	HsaEX0074200	-0.34256	0.23	NA	NA
ZNF780B	HsaEX0074350	-0.259996	0.15	NA	NA
ZNF783	HsaEX0074359	0.213233	0.17	NA	NA
ZNF91	HsaEX0074484	0.345841	0.22	NA	NA
ALG6	HsaALTA0000375-1/3 ‡	0.321285	0.17	NA	NA
ALG6	HsaALTA0000375-2/3	-0.310254	0.15	NA	NA
ARAP3	HsaALTA0000584-2/2	NA	NA	-0.279583	0.16
ATF4	HsaALTA0000747-2/3	-0.386883	0.22	NA	NA
ATF4	HsaALTA0000747-3/3	0.529467	0.38	NA	NA
ATF7IP2	HsaALTA0000751-3/3	-0.3825	0.16	NA	NA
ATP2C1	HsaALTA0000799-2/3	-0.30797	0.18	NA	NA
ATP2C1	HsaALTA0000799-3/3	0.311915	0.18	NA	NA
ATXN2L	HsaALTA0000832-3/3	-0.325133	0.16	NA	NA
C21orf33	HsaALTA0001226-3/3	NA	NA	0.506244	0.26
C5orf42	HsaALTA0001316-1/2	-0.310518	0.19	NA	NA
C5orf42	HsaALTA0001316-2/2	0.320482	0.2	NA	NA
CATSPERG	HsaALTA0001502-1/2	-0.406571	0.19	NA	NA
CATSPERG	HsaALTA0001502-2/2	0.395931	0.18	NA	NA
CCDC12	HsaALTA0001545-1/2	NA	NA	-0.460203	0.17
CCDC12	HsaALTA0001545-2/2	NA	NA	0.438674	0.18
CCDC57	HsaALTA0001581-1/2	-0.533884	0.32	NA	NA
CCDC57	HsaALTA0001581-2/2	0.540857	0.34	NA	NA
CCDC88A	HsaALTA0001593-1/2	NA	NA	0.293287	0.15
CCDC99	HsaALTA0001600-1/2	0.377018	0.19	NA	NA
CCDC99	HsaALTA0001600-2/2	-0.371342	0.15	NA	NA
CEP250	HsaALTA0001799-1/2	-0.35745	0.15	NA	NA
CEP250	HsaALTA0001799-2/2	0.369716	0.17	NA	NA
CEP70	HsaALTA0001808-2/3	0.29768	0.15	NA	NA
CNTROB	HsaALTA0001980-1/2	NA	NA	0.487285	0.25
CNTROB	HsaALTA0001980-2/2	NA	NA	-0.498319	0.26
CPOX	HsaALTA0002126-1/2	-0.33057	0.24	NA	NA
CPOX	HsaALTA0002126-2/2	0.327102	0.24	NA	NA
CSF2RB	HsaALTA0002194-1/2	-0.321737	0.22	NA	NA
CSF2RB	HsaALTA0002194-2/2	0.313504	0.22	NA	NA
CUL3	HsaALTA0002259-2/4	NA	NA	-0.453891	0.2
DEPDC5	HsaALTA0002449-3/3	-0.271544	0.15	NA	NA
DLG4	HsaALTA0002523-2/3	0.531338	0.32	NA	NA
DLG4	HsaALTA0002523-3/3	-0.360088	0.16	NA	NA
E2F1	HsaALTA0002713-1/2	-0.410341	0.25	NA	NA
E2F1	HsaALTA0002713-2/2	0.391465	0.22	NA	NA
EEF1A1	HsaALTA0002748-1/2	NA	NA	0.404817	0.21
EEF1A1	HsaALTA0002748-2/2	NA	NA	-0.38883	0.2
EEF1A1	HsaALTA0002752-1/3	-0.496959	0.27	NA	NA
EEF1A1	HsaALTA0002752-3/3	0.360542	0.15	NA	NA
EEF1A1	HsaALTA0002753-1/3	NA	NA	-0.352524	0.23
ENOSF1	HsaALTA0002916-1/2	0.421236	0.18	NA	NA
ENOSF1	HsaALTA0002916-2/2	-0.413567	0.15	NA	NA
EP400NL	HsaALTA0002933-2/4	-0.482627	0.26	NA	NA
EP400NL	HsaALTA0002933-3/4	0.546465	0.3	NA	NA
EP400NL	HsaALTA0002933-4/4	NA	NA	-0.508451	0.26
FAAH	HsaALTA0003074-2/2	NA	NA	-0.270416	0.15
FAM122C	HsaALTA0003105-1/2	0.522883	0.27	NA	NA
FAM122C	HsaALTA0003105-2/2	-0.499901	0.25	NA	NA
FAM18B2	HsaALTA0003148-2/2	-0.417989	0.16	NA	NA
FASTKD3	HsaALTA0003247-2/3	NA	NA	-0.380357	0.23
GAPDH	HsaALTA0003558-1/2	NA	NA	-0.488224	0.21
GAPDH	HsaALTA0003558-2/2	NA	NA	0.493959	0.22
GNPTAB	HsaALTA0003714-1/2	0.375556	0.16	NA	NA
HM13	HsaALTA0004036-1/3	0.331887	0.19	NA	NA
HM13	HsaALTA0004036-3/3	-0.359102	0.23	NA	NA
HMHA1	HsaALTA0004051-1/2	0.369882	0.23	NA	NA
HMHA1	HsaALTA0004051-2/2	-0.3744	0.24	NA	NA
IL17RE	HsaALTA0004247-3/3	-0.375303	0.16	NA	NA
IL21R	HsaALTA0004258-1/2	NA	NA	-0.552664	0.34
IL21R	HsaALTA0004258-2/2	NA	NA	0.542311	0.32
KIAA1609	HsaALTA0004566-1/2	NA	NA	0.393514	0.17
KIAA1609	HsaALTA0004566-2/2	NA	NA	-0.389899	0.19
KIF3A	HsaALTA0004594-1/2	NA	NA	0.639509	0.4
KIF3A	HsaALTA0004594-2/2	NA	NA	-0.630062	0.41
LARP1	HsaALTA0004700-1/2	0.54746	0.24	NA	NA
LARP1	HsaALTA0004700-2/2	-0.526946	0.22	NA	NA
MPP6	HsaALTA0005310-1/2	NA	NA	-0.31244	0.19
MPP6	HsaALTA0005310-2/2	NA	NA	0.312584	0.19
MT1G	HsaALTA0005394-1/2	0.379188	0.19	NA	NA
MT1G	HsaALTA0005394-2/2	-0.388866	0.22	NA	NA
MTMR6	HsaALTA0005427-1/2	-0.417929	0.16	NA	NA
MTMR6	HsaALTA0005427-2/2	0.405239	0.17	NA	NA
MTO1	HsaALTA0005428-1/2	NA	NA	-0.272586	0.15
MTO1	HsaALTA0005428-2/2	NA	NA	0.283044	0.15
MVP	HsaALTA0005452-2/3	0.456028	0.28	NA	NA
NAB1	HsaALTA0005536-1/2	0.479719	0.17	NA	NA
NBR2	HsaALTA0005575-1/2	-0.421695	0.26	NA	NA
NBR2	HsaALTA0005575-2/2	0.422132	0.25	NA	NA
NCKAP1L	HsaALTA0005597-2/3	-0.396028	0.25	NA	NA
NIF3L1	HsaALTA0005725-1/3	0.546139	0.43	0.366029	0.23
NIF3L1	HsaALTA0005725-2/3	-0.60733	0.47	-0.43735	0.31
NOD1	HsaALTA0005762-1/2	NA	NA	0.486028	0.29
NOD1	HsaALTA0005762-2/2	NA	NA	-0.490245	0.27
NOP2	HsaALTA0005775-1/2	0.257429	0.15	NA	NA
NOP2	HsaALTA0005775-2/2	-0.254474	0.16	NA	NA
NUDCD3	HsaALTA0005871-1/2	0.434436	0.19	NA	NA
NUDCD3	HsaALTA0005871-2/2	-0.436839	0.2	NA	NA
NUSAP1	HsaALTA0005909-1/3	-0.724225	0.46	NA	NA
NVL	HsaALTA0005916-1/2	0.47082	0.23	NA	NA
PA2G4	HsaALTA0006016-2/2	NA	NA	0.361236	0.16
PCGF3	HsaALTA0006117-1/2	0.319921	0.15	NA	NA
PCGF3	HsaALTA0006117-2/2	-0.313558	0.15	NA	NA
PDXDC1	HsaALTA0006176-1/2	0.375337	0.15	NA	NA
PDXDC1	HsaALTA0006176-2/2	-0.380153	0.16	NA	NA
PER3	HsaALTA0006186-1/2	NA	NA	-0.45284	0.28
PER3	HsaALTA0006186-2/2	NA	NA	0.456012	0.27
PHF10	HsaALTA0006234-1/2	NA	NA	-0.371455	0.2
PHF10	HsaALTA0006234-2/2	NA	NA	0.361795	0.17
PIKFYVE	HsaALTA0006308-1/2	NA	NA	-0.416528	0.15
PLAGL1	HsaALTA0006370-1/3	NA	NA	-0.386492	0.19
PLAGL1	HsaALTA0006370-2/3	NA	NA	0.377538	0.18
POLR2B	HsaALTA0006523-1/2	-0.392568	0.17	NA	NA
POLR2B	HsaALTA0006523-2/2	0.391781	0.19	NA	NA
POLR2J3	HsaALTA0006536-4/4	-0.443887	0.29	NA	NA
PON2	HsaALTA0006547-1/2	-0.349234	0.19	NA	NA
PON2	HsaALTA0006547-2/2	0.346153	0.18	NA	NA
PPP1R12A	HsaALTA0006601-1/2	0.435628	0.19	NA	NA
PPP1R12A	HsaALTA0006601-2/2	-0.414448	0.16	NA	NA
PRELID1	HsaALTA0006672-1/2	-0.409182	0.17	NA	NA
PRELID1	HsaALTA0006672-2/2	0.422766	0.17	NA	NA
PTBP2	HsaALTA0006795-1/2	0.341377	0.21	NA	NA
PTBP2	HsaALTA0006795-2/2	-0.341443	0.22	NA	NA
PTMA	HsaALTA0006817-3/4	NA	NA	0.331745	0.21
PTMA	HsaALTA0006817-4/4	NA	NA	-0.349895	0.22
RBM11	HsaALTA0007043-1/2	NA	NA	0.712721	0.49
RBM11	HsaALTA0007043-2/2	NA	NA	-0.693796	0.5
RECK	HsaALTA0007093-1/2	0.436585	0.23	NA	NA
RECK	HsaALTA0007093-2/2	-0.444541	0.23	NA	NA
RFC4	HsaALTA0007123-1/2	NA	NA	-0.293439	0.18
RFC4	HsaALTA0007123-2/2	NA	NA	0.294588	0.17
RFXANK	HsaALTA0007133-1/2	-0.62633	0.41	NA	NA
RFXANK	HsaALTA0007133-2/2	0.626019	0.41	NA	NA
RHOT1	HsaALTA0007173-1/2	NA	NA	0.399204	0.16
RHOT1	HsaALTA0007173-2/2	NA	NA	-0.40157	0.17
RPL14	HsaALTA0007302-1/2	0.32093	0.16	NA	NA
RPL14	HsaALTA0007302-2/2	-0.309286	0.15	NA	NA
RPS3A	HsaALTA0007384-1/2	NA	NA	0.370341	0.15
RWDD2A	HsaALTA0007445-1/2	-0.460451	0.27	NA	NA
RWDD2A	HsaALTA0007445-2/2	0.448038	0.27	NA	NA
SAMD4B	HsaALTA0007474-1/2	0.431064	0.18	NA	NA
SAMD4B	HsaALTA0007474-2/2	-0.439662	0.16	NA	NA
SEC63	HsaALTA0007584-2/2	NA	NA	-0.359743	0.15
SECISBP2	HsaALTA0007587-1/2	0.232549	0.17	NA	NA
SECISBP2	HsaALTA0007587-2/2	-0.231642	0.17	NA	NA
SLC25A23	HsaALTA0007877-1/2	NA	NA	0.429769	0.23
SLC25A23	HsaALTA0007877-2/2	NA	NA	-0.445026	0.28
SLC29A1	HsaALTA0007914-1/2	NA	NA	-0.449316	0.19
SLC29A1	HsaALTA0007914-2/2	NA	NA	0.435524	0.17
SLC35E3	HsaALTA0007947-1/2	NA	NA	0.570976	0.3
SLC35E3	HsaALTA0007947-2/2	NA	NA	-0.571582	0.33
SLC9A3R2	HsaALTA0008008-1/2	NA	NA	-0.316173	0.16
SLC9A3R2	HsaALTA0008008-2/2	NA	NA	0.329054	0.18
SMG6	HsaALTA0008047-1/2	0.483857	0.21	NA	NA
SMG6	HsaALTA0008047-2/2	-0.489635	0.22	NA	NA
SMUG1	HsaALTA0008064-2/3	-0.647017	0.51	NA	NA
SMUG1	HsaALTA0008064-3/3	0.652547	0.51	NA	NA
STOML1	HsaALTA0008311-1/2	NA	NA	-0.276755	0.15
STOML1	HsaALTA0008311-2/2	NA	NA	0.281779	0.15
STXBP4	HsaALTA0008336-1/2	NA	NA	0.318329	0.15
STXBP4	HsaALTA0008336-2/2	NA	NA	-0.307346	0.15
TBC1D17	HsaALTA0008473-1/3	-0.459541	0.19	NA	NA
TBC1D2B	HsaALTA0008482-1/2	-0.368529	0.16	NA	NA
TRAF3	HsaALTA0008930-3/3	NA	NA	-0.400279	0.17
TRIP13	HsaALTA0009009-1/2	-0.2712	0.15	NA	NA
TRIP13	HsaALTA0009009-2/2	0.267178	0.15	NA	NA
TXNRD2	HsaALTA0009178-1/2	NA	NA	-0.310497	0.19
TXNRD2	HsaALTA0009178-2/2	NA	NA	0.313932	0.2
UBA52	HsaALTA0009203-3/3	-0.429582	0.21	NA	NA
WIBG	HsaALTA0009541-1/2	0.341342	0.2	NA	NA
WIBG	HsaALTA0009541-2/2	-0.334865	0.19	NA	NA
WRB	HsaALTA0009552-1/2	0.538953	0.23	NA	NA
WRB	HsaALTA0009552-2/2	-0.521602	0.24	NA	NA
YPEL3	HsaALTA0009595-1/2	-0.439003	0.24	NA	NA
YPEL3	HsaALTA0009595-2/2	0.437673	0.24	NA	NA
ZNF167	HsaALTA0009745-1/2	NA	NA	0.502134	0.27
ZNF167	HsaALTA0009745-2/2	NA	NA	-0.488427	0.27
ZNF177	HsaALTA0009746-1/2	NA	NA	0.540607	0.29
ZNF177	HsaALTA0009746-2/2	NA	NA	-0.521755	0.3
ZNF347	HsaALTA0009802-1/2	-0.403722	0.16	NA	NA
ZNF419	HsaALTA0009819-1/2	0.401999	0.24	NA	NA
ZNF419	HsaALTA0009819-2/2	-0.401491	0.25	NA	NA
ZNF462	HsaALTA0009831-1/3	NA	NA	-0.558885	0.35
ZNF462	HsaALTA0009831-2/3	NA	NA	0.37419	0.16
ZNF642	HsaALTA0009872-1/2	NA	NA	-0.531197	0.27
ZNF642	HsaALTA0009872-2/2	NA	NA	0.51144	0.28
ZNF76	HsaALTA0009908-1/3	0.447588	0.18	NA	NA
ZNF780B	HsaALTA0009921-1/2	-0.249842	0.16	NA	NA
ZNF780B	HsaALTA0009921-2/2	0.253131	0.17	NA	NA
AC005726.6	HsaALTD0000058-1/2ﬁ	NA	NA	0.490252	0.26
AC005726.6	HsaALTD0000058-2/2	NA	NA	-0.488202	0.27
AFAP1L2	HsaALTD0000183-1/2	0.306878	0.15	NA	NA
AFMID	HsaALTD0000188-1/2	-0.597223	0.39	NA	NA
AFMID	HsaALTD0000188-2/2	0.61047	0.4	NA	NA
ALG13	HsaALTD0000262-1/2	0.229853	0.16	NA	NA
ALG13	HsaALTD0000262-2/2	-0.236284	0.17	NA	NA
ALG3	HsaALTD0000264-1/2	NA	NA	0.433192	0.17
ALG3	HsaALTD0000264-2/2	NA	NA	-0.474712	0.17
ALG6	HsaALTD0000269-2/2	0.317877	0.17	NA	NA
AP001011.3	HsaALTD0000367-2/2	NA	NA	-0.235344	0.15
ARF1	HsaALTD0000423-1/4	NA	NA	-0.490372	0.29
ASAH2B	HsaALTD0000499-1/2	NA	NA	0.33247	0.2
ASAH2B	HsaALTD0000499-2/2	NA	NA	-0.337127	0.18
ATP5J2	HsaALTD0000587-1/2	-0.516536	0.21	NA	NA
ATP5J2	HsaALTD0000587-2/2	0.503378	0.25	NA	NA
C10orf28	HsaALTD0000781-1/2	NA	NA	0.373189	0.15
C15orf39	HsaALTD0000834-2/2	-0.229106	0.15	NA	NA
C8orf38	HsaALTD0001068-1/2	0.312686	0.19	NA	NA
C8orf38	HsaALTD0001068-2/2	-0.309515	0.2	NA	NA
COMMD6	HsaALTD0001584-1/2	-0.418222	0.2	NA	NA
COMMD6	HsaALTD0001584-2/2	0.390143	0.19	NA	NA
CTAGE5	HsaALTD0001715-1/2	NA	NA	-0.445314	0.25
CTAGE5	HsaALTD0001715-2/2	NA	NA	0.436167	0.26
CXorf57	HsaALTD0001759-2/2	-0.331836	0.17	NA	NA
DCAF17	HsaALTD0001813-1/2	-0.433646	0.15	NA	NA
DCTD	HsaALTD0001822-1/2	NA	NA	0.351843	0.24
DCTD	HsaALTD0001822-2/2	NA	NA	-0.343991	0.22
DISC1	HsaALTD0001941-1/2	NA	NA	-0.365903	0.22
DISC1	HsaALTD0001941-2/2	NA	NA	0.37046	0.24
DLG4	HsaALTD0001950-1/2	-0.445893	0.26	NA	NA
DLG4	HsaALTD0001950-2/2	0.458677	0.27	NA	NA
DNMT3A	HsaALTD0001988-2/2	-0.341683	0.15	NA	NA
E2F1	HsaALTD0002085-1/2	0.363215	0.2	NA	NA
E2F1	HsaALTD0002085-2/2	-0.36294	0.2	NA	NA
EEF1A1	HsaALTD0002118-5/7	-0.382029	0.16	NA	NA
EEF1D	HsaALTD0002124-1/2	0.238397	0.15	NA	NA
EEF1D	HsaALTD0002124-2/2	-0.239152	0.15	NA	NA
FAM134C	HsaALTD0002386-1/2	NA	NA	-0.770917	0.51
FAM134C	HsaALTD0002386-2/2	NA	NA	0.761544	0.51
FAM200B	HsaALTD0002424-1/2	0.316623	0.19	NA	NA
FAM200B	HsaALTD0002424-2/2	-0.306923	0.19	NA	NA
FAM76B	HsaALTD0002458-1/3	-0.401143	0.25	NA	NA
FAM76B	HsaALTD0002458-2/3	0.397123	0.24	NA	NA
FBXO44	HsaALTD0002516-1/2	-0.256803	0.18	NA	NA
FBXO44	HsaALTD0002516-2/2	0.256263	0.17	NA	NA
GART	HsaALTD0002718-1/4	NA	NA	-0.315421	0.19
GBAP	HsaALTD0002728-1/2	-0.281254	0.15	NA	NA
GBAP	HsaALTD0002728-2/2	0.277741	0.15	NA	NA
GGA1	HsaALTD0002758-1/2	-0.393776	0.16	NA	NA
GGA1	HsaALTD0002758-2/2	0.411181	0.19	NA	NA
GNL3	HsaALTD0002814-2/2	-0.416669	0.16	NA	NA
HEATR6	HsaALTD0003000-1/2	NA	NA	-0.487282	0.24
HEATR6	HsaALTD0003000-2/2	NA	NA	0.480931	0.24
HMBOX1	HsaALTD0003059-1/2	NA	NA	-0.333915	0.15
HMBOX1	HsaALTD0003059-2/2	NA	NA	0.347397	0.17
HNRNPA3	HsaALTD0003081-2/3	NA	NA	0.448646	0.22
IDUA	HsaALTD0003180-1/2	-0.291347	0.18	NA	NA
IDUA	HsaALTD0003180-2/2	0.29839	0.18	NA	NA
IFT80	HsaALTD0003198-1/2	0.491461	0.28	NA	NA
IFT80	HsaALTD0003198-2/2	-0.486455	0.26	NA	NA
IKZF2	HsaALTD0003214-1/2	-0.358268	0.15	NA	NA
IL17RA	HsaALTD0003220-1/3	0.411632	0.19	NA	NA
IL17RA	HsaALTD0003220-2/3	-0.419475	0.21	NA	NA
KAT2A	HsaALTD0003381-1/2	-0.251479	0.2	NA	NA
KAT2A	HsaALTD0003381-2/2	0.250367	0.19	NA	NA
KIF3A	HsaALTD0003481-1/2	NA	NA	-0.642495	0.44
KIF3A	HsaALTD0003481-2/2	NA	NA	0.646855	0.44
KLRAQ1	HsaALTD0003510-1/2	-0.317794	0.17	NA	NA
KLRAQ1	HsaALTD0003510-2/2	0.317561	0.16	NA	NA
LARP4B	HsaALTD0003555-1/2	0.518429	0.3	NA	NA
LARP4B	HsaALTD0003555-2/2	-0.51258	0.26	NA	NA
LDHC	HsaALTD0003574-1/2	0.410663	0.19	NA	NA
LDHC	HsaALTD0003574-2/2	-0.394572	0.18	NA	NA
MPHOSPH8	HsaALTD0003990-1/2	0.306415	0.16	NA	NA
MPHOSPH8	HsaALTD0003990-2/2	-0.310707	0.17	NA	NA
MRPL38	HsaALTD0004025-1/2	-0.454131	0.21	NA	NA
MRPL38	HsaALTD0004025-2/2	0.458739	0.22	NA	NA
NADK	HsaALTD0004158-1/2	-0.346758	0.16	NA	NA
NADK	HsaALTD0004158-2/2	0.342688	0.17	NA	NA
NDE1	HsaALTD0004218-1/2	NA	NA	0.503113	0.23
NDE1	HsaALTD0004218-2/2	NA	NA	-0.476139	0.21
NOP2	HsaALTD0004355-1/2	-0.264614	0.15	NA	NA
NOP2	HsaALTD0004355-2/2	0.259792	0.15	NA	NA
NPHP3	HsaALTD0004365-2/3	-0.401329	0.21	NA	NA
NPLOC4	HsaALTD0004370-1/2	NA	NA	0.389378	0.21
NPLOC4	HsaALTD0004370-2/2	NA	NA	-0.385011	0.2
NUDCD2	HsaALTD0004432-1/2	-0.264411	0.16	NA	NA
NUDCD2	HsaALTD0004432-2/2	0.268497	0.17	NA	NA
NUDT1	HsaALTD0004433-2/2	-0.246609	0.15	NA	NA
NUMA1	HsaALTD0004440-1/3	NA	NA	0.399148	0.16
OMA1	HsaALTD0004496-1/3	-0.262612	0.17	NA	NA
OMA1	HsaALTD0004496-2/3	0.278717	0.17	NA	NA
PIN1	HsaALTD0004779-1/2	-0.341301	0.22	NA	NA
PIN1	HsaALTD0004779-2/2	0.34651	0.2	NA	NA
POLR2J2	HsaALTD0004940-2/3	NA	NA	-0.259556	0.16
PQBP1	HsaALTD0005023-1/2	0.412751	0.16	NA	NA
PQBP1	HsaALTD0005023-2/2	-0.397744	0.15	NA	NA
R3HDM1	HsaALTD0005216-1/2	NA	NA	-0.461573	0.22
R3HDM1	HsaALTD0005216-2/2	NA	NA	0.447109	0.18
RAB7L1	HsaALTD0005242-1/2	NA	NA	0.338056	0.21
RAB7L1	HsaALTD0005242-2/2	NA	NA	-0.333919	0.21
RFC5	HsaALTD0005368-1/3	0.382219	0.17	NA	NA
RHPN1	HsaALTD0005410-1/2	-0.407234	0.21	NA	NA
RHPN1	HsaALTD0005410-2/2	0.404132	0.19	NA	NA
RPE	HsaALTD0005507-1/2	0.431861	0.21	NA	NA
RPE	HsaALTD0005507-2/2	-0.427551	0.18	NA	NA
RPL7A	HsaALTD0005551-1/3	-0.376882	0.15	NA	NA
RPL7A	HsaALTD0005551-2/3	0.388063	0.17	NA	NA
RPS6	HsaALTD0005595-2/2	0.254659	0.15	NA	NA
RRAGB	HsaALTD0005609-1/2	NA	NA	-0.253802	0.15
SEC23A	HsaALTD0005736-1/2	0.351835	0.15	NA	NA
SEC23A	HsaALTD0005736-2/2	-0.351971	0.15	NA	NA
SEMA6C	HsaALTD0005768-1/2	0.312884	0.19	NA	NA
SEMA6C	HsaALTD0005768-2/2	-0.313203	0.19	NA	NA
SHF	HsaALTD0005890-1/2	0.474899	0.18	NA	NA
SHF	HsaALTD0005890-2/2	-0.514031	0.24	NA	NA
SLC25A17	HsaALTD0005973-1/2	NA	NA	0.446623	0.23
SLC25A17	HsaALTD0005973-2/2	NA	NA	-0.465176	0.25
SMUG1	HsaALTD0006091-1/2	0.445459	0.25	NA	NA
SMUG1	HsaALTD0006091-2/2	-0.435198	0.26	NA	NA
SNX21	HsaALTD0006125-1/2	0.399671	0.17	NA	NA
SNX21	HsaALTD0006125-2/2	-0.369745	0.17	NA	NA
SSR3	HsaALTD0006226-1/2	0.857115	0.65	NA	NA
SSR3	HsaALTD0006226-2/2	-0.867312	0.67	NA	NA
TAF9	HsaALTD0006361-1/2	0.405729	0.32	NA	NA
TAF9	HsaALTD0006361-2/2	-0.413535	0.33	NA	NA
TANK	HsaALTD0006370-1/3	-0.366455	0.17	NA	NA
TANK	HsaALTD0006370-2/3	0.35552	0.17	NA	NA
TARDBP	HsaALTD0006373-1/2	NA	NA	-0.443121	0.15
TARDBP	HsaALTD0006373-2/2	NA	NA	0.457637	0.18
TCEAL3	HsaALTD0006420-1/2	NA	NA	0.451589	0.31
TCEAL3	HsaALTD0006420-2/2	NA	NA	-0.459522	0.33
TMBIM6	HsaALTD0006570-2/2	-0.247742	0.15	NA	NA
TPI1	HsaALTD0006719-1/2	0.526323	0.23	NA	NA
TPI1	HsaALTD0006719-2/2	-0.533803	0.23	NA	NA
TSC2	HsaALTD0006827-1/2	-0.350498	0.16	NA	NA
TSC2	HsaALTD0006827-2/2	0.353474	0.16	NA	NA
TYK2	HsaALTD0006943-1/2	NA	NA	0.382882	0.23
TYK2	HsaALTD0006943-2/2	NA	NA	-0.370875	0.22
USP49	HsaALTD0007087-1/2	NA	NA	-0.317587	0.16
WBP1	HsaALTD0007164-1/2	0.242861	0.16	NA	NA
WBP1	HsaALTD0007164-2/2	-0.245678	0.15	NA	NA
WSB1	HsaALTD0007233-2/2	NA	NA	-0.241186	0.15
ZNF432	HsaALTD0007445-2/3	-0.572002	0.31	NA	NA
ZNF444	HsaALTD0007446-1/2	-0.435198	0.22	NA	NA
ZNF444	HsaALTD0007446-2/2	0.43365	0.17	NA	NA
ZNF513	HsaALTD0007460-1/2	0.69381	0.42	NA	NA
ZNF513	HsaALTD0007460-2/2	-0.68467	0.41	NA	NA
ZNF646	HsaALTD0007489-1/2	NA	NA	0.295478	0.19
ZNF646	HsaALTD0007489-2/2	NA	NA	-0.308436	0.2
ZNF783	HsaALTD0007511-1/2	0.302625	0.24	NA	NA
ZNF783	HsaALTD0007511-2/2	-0.294897	0.24	NA	NA
†: INT indicates Intron retention. §: EX indicates Cassette Exon. ‡: ALTA indicates Alternative 5' SS. ﬁ: ALTD indicates Alternative 5' SS. *NA - indicates that this event was not annotated to a gene.
