# Supplementary material for: The RNA helicase DDX39B activates FOXP3 RNA splicing to control T regulatory cell fate
Source: eLife. 2023 Jun 1;12:e76927. doi: 10.7554/eLife.76927 (PMC10234631; doi:10.7554/eLife.76927)
Supplement: Supplementary file 8. [file elife-76927-supp8.xlsx]

## Sheet: Sheet1
	Supplementary file 8. Primer and Gblock sequences used in this study.
Target	Oligo Name	Assay	Used in	Sequence
EEF1A1	EEF1A1_Ttl_F	qRT-PCR	Fig. 1, Fig. 2, Fig.3, and Supplemental Figs	TTGGTTCAAGGGATGGAAAG
	EEF1A1_Ttl_R	qRT-PCR	Fig. 1, Fig. 2, Fig.3, and Supplemental Figs	TTGTCAGTTGGACGAGTTGG
DDX39B	DDX39B exon 6 forward RT-qPCR (DDXq51)	qRT-PCR	Fig. 1	GTGCTACCTTGAGCAAAGAGA
	DDX39B exon 7 reverse RT-qPCR (DDXq52)	qRT-PCR	Fig. 1	AACCCATGCAGCGTCAA
FOXP3	FOXP3_qF	qRT-PCR	Fig. 1	ACCTACGCCACGCTCATC
	FOXP3_qR	qRT-PCR	Fig. 1	AACATGCGTGTGAACCAGTG
IL10	IL10_qF	qRT-PCR	Fig. 2 and Supplemental Figs	CGAGATGCCTTCAGCAGAGT
	IL10_qR	qRT-PCR	Fig. 2 and Supplemental Figs	GGCAACCCAGGTAACCCTTA
IL2RA	IL2RA_qF	qRT-PCR	Fig. 2 and Supplemental Figs	GTCCTGGGACAACCAATGTC
	IL2RA_qR	qRT-PCR	Fig. 2 and Supplemental Figs	CACTGGCTGCATTGGACTT
FOXP3 total	FP3-ttl3p_qF	qRT-PCR	Fig.4	AGAAGCAGCGGACACTCAAT
	FP3-ttl3p_qR	qRT-PCR	Fig.4	TGGCAGGATGGTTTCTGAAG
FOXP3 intron 2	FP3-int2_qF	qRT-PCR	Fig.4	GAACAGTGAGGATCAGGATGG
	FP3-ex3_qR	qRT-PCR	Fig.4	CTGGAGGAGTGCCTGTAAGTG
FOXP3 intron 4	FP3-int4_qF	qRT-PCR	Fig.4	GCTCAAAATGAGAGGCCTTG
	FP3-ex5_qR	qRT-PCR	Fig.4	ATTTGGGAAGGTGCAGAGC
FOXP3 intron 6	FP3-ex6_qF	qRT-PCR	Fig.4	CTTCGAAGAGCCAGAGGACTT
	FP3-int6_qR	qRT-PCR	Fig.4	ATCTGCACCCTAGACCTCTCC
FOXP3 intron 7	FP3-int7_qF	qRT-PCR	Fig.4	GTAGCCTGGGCAAAGATGTG
	FP3-ex8_qR	qRT-PCR	Fig.4	CACTCAGCTTCTCCTTCTCCA
FOXP3 intron 9	FP3-ex9_qF	qRT-PCR	Fig.4	GTAGCCATGGAAACAGCACAT
	FP3-int9_qR	qRT-PCR	Fig.4	GCCTGTCAGGATTAGGAGCTT
FOXP3 intron 11	FP3-int11_qF	qRT-PCR	Fig.4	GTCTGGGCTCATAGGCACAT
	FP3-ex12_qR	qRT-PCR	Fig.4	AGCACTTGTGCAGACTCAGG
	KpnI-RLuc_Fw	Plasmid construction	Fig. 6 and Supplememtal Figs	AGCGTTTAAACTTAAGCTTGGTACCATGACTTCG
	RLuc-EcoRI_Rv	Plasmid construction	Fig. 6 and Supplememtal Figs	CGGCCGCCACTGTGCTGGATATCTTATTGTTC
	FOXP3Intron11_Rv1	Plasmid construction	Fig. 6 and Supplememtal Figs	AGGAGCTCACCTTATCTTGATGCTCATAGCT
	FOXP3Intron11_Fw2	Plasmid construction	Fig. 6 and Supplememtal Figs	TCAAGATAAGGTGAGCTCCTCTGAGGTGGC
	FOXP3Intron11_Rv2	Plasmid construction	Fig. 6 and Supplememtal Figs	TTGCTTTGATCTGTGGAAGGCCGGGGACAGG
	FOXP3Intron11_Fw3	Plasmid construction	Fig. 6 and Supplememtal Figs	CCTTCCACAGATCAAAGCAATAGTTCACGCTG
	RLuc_Fw	End-point PCR	Fig. 6 and Supplememtal Figs	TAACGCGGCCTCTTCTTATTT
	RLuc_Rv	End-point PCR	Fig. 6 and Supplememtal Figs	GGATTTCACGAGGCCATGATA
	Intron11_5'SSMut_Rv1	Plasmid mutagenesis	Fig. 6 and Supplememtal Figs	GGAACTCACCTTATCTTGATGC
	Intron11_5'SSMut_Fw2	Plasmid mutagenesis	Fig. 6 and Supplememtal Figs	GATAAGGTGAGTTCCTCTGAG
	Intron11_3'SSPolyT_Rv1	Plasmid mutagenesis	Fig. 6 and Supplememtal Figs	GTGGAAAAAAAAAAAAAGGGAGCAGGTGGGCG
	Intron11_3'SSPolyT_Fw2	Plasmid mutagenesis	Fig. 6 and Supplememtal Figs	CTCCCTTTTTTTTTTTTTCCACAGATCAAAG
	DD-DDX-46	Plasmid mutagenesis	Fig. 7	CAAGTCGGGCATGGGAGCCACAGCAGTGTTTGTCTTG
	DD-DDX-50	Plasmid mutagenesis	Fig. 7	CAAGACAAACACTGCTGTGGCTCCCATGCCCGACTTG
	DD-DDX-47	Plasmid mutagenesis	Fig. 7	CATTAAACACTTTATTTTGGATGCCTGTGATAAGATGCTTGAAC
	DD-DDX-51	Plasmid mutagenesis	Fig. 7	GTTCAAGCATCTTATCACAGGCATCCAAAATAAAGTGTTTAATG
	HGB1_Rv1	Plasmid construction	Supplemental Figs	TGATACCAACCTGATTTGCCCATACCAATAAGG
	HGB1_Fw2	Plasmid construction	Supplemental Figs	GGCAAATCAGGTTGGTATCAAGGTTACAAGACAGG
	HGB1_Rv2	Plasmid construction	Supplemental Figs	CCAGATTTGCCTAAGGGTGGGAAAATAGACCA
	HGB1_Fw3	Plasmid construction	Supplemental Figs	CCACCCTTAGGCAAATCTGGTAATGGTTCTTATAG
FOXP1Intron19_gBlock	FOXP1Intron19	Plasmid construction	Supplemental Figs	GTAAGATTAACGGCCGTCCCGAATATGCAGCAGAGGCACAGGTCTCCCCTACTCATTTCAAAATATATTAGCCTTAGTACACCCATAATTAGTAGTTTCCTTGTCTTACATACCCTGTGTCTTCATAAATTTTCTCTTGGTTGATGACAG
FOXP1C-rich py tract_gBlock	FOXP1C-rich py Intron19	Plasmid construction	Supplemental Figs	GTAAGATTAACGGCCGTCCCGAATATGCAGCAGAGGCACAGGTCTCCCCTACTCATTTCAAAATATATTAGCCTTAGTACACCCATAATTAGTAGTTTCCTTGTCTTACATACCCTGTGTCTTCATAAATCTGTCCCCGGCCTTCCACAG
	FOXP3Intron7_Rv1	Plasmid construction	Supplemental Figs	CTGCAAATTCTTCTGGTTCTAACTTTCTCATG
	FOXP3Intron7_Fw2	Plasmid construction	Supplemental Figs	AGAACCAGAAGAATTTGCAGGTAATGCCAGGGCGTGGAGGG
	FOXP3Intron7_Rv2	Plasmid construction	Supplemental Figs	TTTGAATGGTTCAAGATATGCTGTGAAATGGCACAAACATGAGGCC
	FOXP3Intron7_Fw3	Plasmid construction	Supplemental Figs	CATATCTTGAACCATTCAAAGAGAAAGGTGAAG
	Intron7_5'SSMut_Rv1	Plasmid mutagenesis	Supplemental Figs	CTGGACTTACCTGCAAATTC
	Intron7_5'SSMut_Fw2	Plasmid mutagenesis	Supplemental Figs	GCAGGTAAGTCCAGGGCGG
	Intron7_3'SSPolyT_Rv1	Plasmid mutagenesis	Supplemental Figs	GTGAAAAAAAAAAAAAATGAGGCCTCAGCCTGGC
	Intron7_3'SSPolyT_Fw2	Plasmid mutagenesis	Supplemental Figs	CTCATTTTTTTTTTTTTTCACAGCCAGCATATCT
APC	APC_qF	qRT-PCR	Supplemental Figs	TCAGATCTGTCCTGCTGTGTG
	APC_qR	qRT-PCR	Supplemental Figs	AATTCTGCAATGGCCTGTAG
BCL3	BCL3_qF	qRT-PCR	Supplemental Figs	AACACCGAGTGCCAAGAAAC
	BCL3_qR	qRT-PCR	Supplemental Figs	CACCATGCTAAGGCTGTTGTT
CCR2
CCR4	CCR4_qF	qRT-PCR	Supplemental Figs	CATGGTCAGTGGCTGTGTTC
	CCR4_qR	qRT-PCR	Supplemental Figs	CACGTCGTGGAGTTGAGAGA
CSF2	CSF2_qF	qRT-PCR	Supplemental Figs	ATGTTTGACCTCCAGGAGCC
	CSF2_qR	qRT-PCR	Supplemental Figs	AGTGCTGCTTGTAGTGGCTG
CST7	CST7_qF	qRT-PCR	Supplemental Figs	GTTCAACAACTGCACGAACG
	CST7_qR	qRT-PCR	Supplemental Figs	GTTCTGCCAATTTCCACCTC
CTLA4	CTLA4_qF	qRT-PCR	Supplemental Figs	ATGGCTTGCCTTGGATTTCA
	CTLA4_qR	qRT-PCR	Supplemental Figs	TTTGCAGAAGACAGGGATGA
DDX39A	DDX39A_qF	qRT-PCR	Supplemental Figs	CCGAAGTTGGAAGTGTCTCTTAG
	DDX39A_qR	qRT-PCR	Supplemental Figs	GGCTCTTCCTCTTCATCGTAATC
DMPK	DMPK_qF	qRT-PCR	Supplemental Figs	CTGCCTTTTGTGGGCTACTC
	DMPK_qR	qRT-PCR	Supplemental Figs	CACGTGTGGCTCAAGCAG
DUSP1	DUSP1_qF	qRT-PCR	Supplemental Figs	ACAAGAGCATCCCTGTGGAG
	DUSP1_qR	qRT-PCR	Supplemental Figs	ACCCTTCCTCCAGCATTCTT
EBI3	EBI3_qF	qRT-PCR	Supplemental Figs	CAGCTTCGTGCCTTTCATAA
	EBI3_qR	qRT-PCR	Supplemental Figs	GTGAGAAGATCTCTGGGAAGG
EGR1	EGR1_qF	qRT-PCR	Supplemental Figs	AGCCCTACGAGCACCTGAC
	EGR1_qR	qRT-PCR	Supplemental Figs	AGCGGCCAGTATAGGTGATG
ENTPD1	ENTPD1_qF	qRT-PCR	Supplemental Figs	CCAAGAGGAAGGTGCCTATG
	ENTPD1_qR	qRT-PCR	Supplemental Figs	AGGTCCAAAGCTCCAAAGGT
FOS
GAPDH	GAPDH_qF	qRT-PCR	Supplemental Figs	AGCCACATCGCTCAGACAC
	GAPDH_qR	qRT-PCR	Supplemental Figs	GCCCAATACGACCAAATCC
GATA3	GATA3_qF	qRT-PCR	Supplemental Figs	CCGCCCTACTACGGAAACTC
	GATA3_qR	qRT-PCR	Supplemental Figs	GGTAGGGATCCATGAAGCAG
HLA-DQB1	HLA-DQB1_qF	qRT-PCR	Supplemental Figs	ACAACTACGAGGTGGCGTTC
	HLA-DQB1_qR	qRT-PCR	Supplemental Figs	AATCTGTCACCGAGCAGACC
HLA-DRA	HLA-DRA_qF	qRT-PCR	Supplemental Figs	CAAAAGCAATGCAGCAGAAC
	HLA-DRA_qR	qRT-PCR	Supplemental Figs	GCCAGCTTTGTAAAGCCATT
HLA-DRB1	HLA-DRB1_qF	qRT-PCR	Supplemental Figs	GCACAGAGCAAGATGCTGAG
	HLA-DRB1_qR	qRT-PCR	Supplemental Figs	AATCCTGTTGGCTGAAGTCC
ICAM1	ICAM1_qF	qRT-PCR	Supplemental Figs	GAACCAGAGCCAGGAGACAC
	ICAM1_qR	qRT-PCR	Supplemental Figs	GGGCCTCACACTTCACTGTC
IFNG	IFNG_qF	qRT-PCR	Supplemental Figs	GAGTGTGGAGACCATCAAGGA
	IFNG_qR	qRT-PCR	Supplemental Figs	GTATTGCTTTGCGTTGGACA
IL1A	IL1A_qF	qRT-PCR	Supplemental Figs	CGGGAAGGTTCTGAAGAAGA
	IL1A_qR	qRT-PCR	Supplemental Figs	GGAAGCTAAAAGGTGCTGACC
IL1B	IL1B_qF	qRT-PCR	Supplemental Figs	GCTGAGGAAGATGCTGGTTC
	IL1B_qR	qRT-PCR	Supplemental Figs	CGTGCACATAAGCCTCGTTA
IL2	IL2_qF	qRT-PCR	Supplemental Figs	AAACCTCTGGAGGAAGTGCT
	IL2_qR	qRT-PCR	Supplemental Figs	CATGAATGTTGTTTCAGATCCCTTT
IL4	IL4_qF	qRT-PCR	Supplemental Figs	ACTGCACAGCAGTTCCACAG
	IL4_qR	qRT-PCR	Supplemental Figs	ACTCTGGTTGGCTTCCTTCA
IL5	IL5_qF	qRT-PCR	Supplemental Figs	AGCCAATGAGACTCTGAGGATTC
	IL5_qR	qRT-PCR	Supplemental Figs	CAGTACCCCCTTGCACAGTT
IL6	IL6_qF	qRT-PCR	Supplemental Figs	AATTCGGTACATCCTCGACGG
	IL6_qR	qRT-PCR	Supplemental Figs	GGTTGTTTTCTGCCAGTGCC
IL8	IL8_qF	qRT-PCR	Supplemental Figs	CCACCGGAAGGAACCATCTC
	IL8_qR	qRT-PCR	Supplemental Figs	GGCAAAACTGCACCTTCACA
IL9	IL9_qF	qRT-PCR	Supplemental Figs	AGATCCAGCTTCCAAGTGCC
	IL9_qR	qRT-PCR	Supplemental Figs	TCTGGTGCAGTTGTCAGAGG
IL13	IL13_qF	qRT-PCR	Supplemental Figs	CCTGACAGCTGGCATGTACT
	IL13_qR	qRT-PCR	Supplemental Figs	CTCTGGGTCTTCTCGATGGC
IL17A	IL17A_qF	qRT-PCR	Supplemental Figs	GCAGGCACAAACTCATCCATC
	IL17A_qR	qRT-PCR	Supplemental Figs	CAGCAGTAGCAGTGACACCA
IL17D	IL17D_qF	qRT-PCR	Supplemental Figs	CATCCCTGGCTTGCTTTTAG
	IL17D_qR	qRT-PCR	Supplemental Figs	TCCGTGAACTTTTCCAAACC
IL17F	IL17F_qF	qRT-PCR	Supplemental Figs	GGCATCATCAATGAAAACCA
	IL17F_qR	qRT-PCR	Supplemental Figs	GATGCAGCCCAAGTTCCTAC
IL21	IL21_qF	qRT-PCR	Supplemental Figs	AGAGGAAACCACCTTCCACA
	IL21_qR	qRT-PCR	Supplemental Figs	AGGAATTCTTTGGGTGGTTTT
IL22	IL22_qF	qRT-PCR	Supplemental Figs	ATCACCAACCGCACCTTCAT
	IL22_qR	qRT-PCR	Supplemental Figs	AGCAGCGCTCACTCATACTG
IL7R	IL7R_qF	qRT-PCR	Supplemental Figs	CAATATATGTGTGAAGGTTGGAGAA
	IL7R_qR	qRT-PCR	Supplemental Figs	CATTGGCTCCTTCCCGATAG
JUN	JUN_qF	qRT-PCR	Supplemental Figs	TGACTGCAAAGATGGAAACG
	JUN_qR	qRT-PCR	Supplemental Figs	CAGGGTCATGCTCTGTTTCA
LIF	LIF_qF	qRT-PCR	Supplemental Figs	CCTCCTTAGCAACGTGCTGT
	LIF_qR	qRT-PCR	Supplemental Figs	GTTGACAGCCCAGCTTCTTC
NEDD4	NEDD4_qF	qRT-PCR	Supplemental Figs	GTGGGAAGAGAGGCAGGATA
	NEDD4_qR	qRT-PCR	Supplemental Figs	GAATGTTGCCATTCTCAGCA
NRN1	NRN1_qF	qRT-PCR	Supplemental Figs	GCTTTTCGGACTGTTTGCTC
	NRN1_qR	qRT-PCR	Supplemental Figs	CAATCCGTAAGGGCTGTGAC
NT5E	NT5E_qF	qRT-PCR	Supplemental Figs	TCCAAAGAAACCCCTTTTCTC
	NT5E_qR	qRT-PCR	Supplemental Figs	CGAATGTCCCAGTGCAATAA
PHLDA1	PHLDA1_qF	qRT-PCR	Supplemental Figs	CCACATCCACATCCACACTCT
	PHLDA1_qR	qRT-PCR	Supplemental Figs	AGGTGCTGCGGAGAAGCCGGT
RORC	RORC_qF	qRT-PCR	Supplemental Figs	GACAGGGCCCAGACAGCTAC
	RORC_qR	qRT-PCR	Supplemental Figs	GGCATGTCTCCCTGTAGGAC
STAT1	STAT1_qF	qRT-PCR	Supplemental Figs	CAATGGTGTGGCAAAGAGTG
	STAT1_qR	qRT-PCR	Supplemental Figs	GGGCATTCTGGGTAAGTTCA
TBX21	TBX21_qF	qRT-PCR	Supplemental Figs	CCACCTGTTGTGGTCCAAGT
	TBX21_qR	qRT-PCR	Supplemental Figs	ACCACGTCCACAAACATCCT
TGFB1	TGFB1_qF	qRT-PCR	Supplemental Figs	GAGCCTGAGGCCGACTACTA
	TGFB1_qR	qRT-PCR	Supplemental Figs	CGGAGCTCTGATGTGTTGAA
TKTL1	TKTL1_qF	qRT-PCR	Supplemental Figs	GCCGGATCATTACAGTGGAG
	TKTL1_qR	qRT-PCR	Supplemental Figs	ATTCCTCGGACTTCCCACTC
TNFA	TNFA_qF	qRT-PCR	Supplemental Figs	GTTGTAGCAAACCCTCAAGCTG
	TNFA_qR	qRT-PCR	Supplemental Figs	TATCTCTCAGCTCCACGCCA
TNFRSF9	TNFRSF9_qF	qRT-PCR	Supplemental Figs	ACGCTCCGTTTCTCTGTTGT
	TNFRSF9_qR	qRT-PCR	Supplemental Figs	GCAGCTACAGCCATCTTCCT
TNFRSF18	TNFRSF18_qF	qRT-PCR	Supplemental Figs	CATGTGTGTCCAGCCTGAAT
	TNFRSF18_qR	qRT-PCR	Supplemental Figs	GGCACAGTCGATACACTGGA
FOXP1 Intron 11	FP1-int11_qF	qRT-PCR	Supplemental Figs	GGTTCTTGGCAGCAAATTCAT
	FP1-ex12_qR	qRT-PCR	Supplemental Figs	GCATACACCATGTCCATAGAGAG
FOXP1 Intron 14	FP1-Int14_qF	qRT-PCR	Supplemental Figs	CTAGATGTGGTTCCTGGGTTG
	FP1-ex15_qR	qRT-PCR	Supplemental Figs	GACTTGGAGAGAGTGACACTTG
FOXP1 Intron 19	FP1-int19_qF	qRT-PCR	Supplemental Figs	GTCTTACATACCCTGTGTCTTCATA
	FP1-ex20_qR	qRT-PCR	Supplemental Figs	CCATGGAAGCGGTAGTGTATAG
FOXP1 Total	FP1-ttlEx21_qF	qRT-PCR	Supplemental Figs	TCGATCCAGAGGAAGCTGAA
	FP1-ttlEx21_qR	qRT-PCR	Supplemental Figs	GTCACTCCATGTCCTCGTTTAC
FAM3A Intron 6	FAM3A_int6_qF	qRT-PCR	Supplemental Figs	AGGCTGGCCTGGCTTACC
	FAM3A_ex7_qR	qRT-PCR	Supplemental Figs	TCCGGCCCACATGTCAAA
FAM3A Intron 7	FAM3A_int7_qF	qRT-PCR	Supplemental Figs	CCCAATCCCTACTTCTGTTTCC
	FAM3A_ex8_qR	qRT-PCR	Supplemental Figs	CAGTGGCCGAATAAACTTCAAC
FAM3A Total	FAM3A_ex9_qF	qRT-PCR	Supplemental Figs	CAGAACGTGGTCTCAAGGTG
	FAM3A_ex9_qR	qRT-PCR	Supplemental Figs	AATGGAGGACAGGGCTAGAT
RENBP Intron 3	RENBP_int3_qF	qRT-PCR	Supplemental Figs	CCATCGCCTCAAAGGTCTC
	RENBP_ex4_qR	qRT-PCR	Supplemental Figs	AGGCGACAATACATCCATAC
RENBP Intron 6	RENBP_int6_qF	qRT-PCR	Supplemental Figs	GGAGCTGGGTCTTTCTAGTTG
	RENBP_ex7_qR	qRT-PCR	Supplemental Figs	TGACACATTCTCCAGCACAG
RENBP Total	RENBP_ex9_qF	qRT-PCR	Supplemental Figs	CACACAGTGAAGCCATGATTG
	RENBP_ex9_qR	qRT-PCR	Supplemental Figs	GTACTCAGCCACTTGGTAGAAG
RBM10 Intron 5	RBM10_Int5_qF	qRT-PCR	Supplemental Figs	GGGAGATCTCTTCATCCAAGTTT
	RBM10_ex6_qR	qRT-PCR	Supplemental Figs	CACTTCTCTCGGCGTTTGA
RBM10 Intron 12	RBM10_int12_qF	qRT-PCR	Supplemental Figs	CCCACACCTTCCTGTTCTAATG
	RBM10_ex13_qR	qRT-PCR	Supplemental Figs	TCCTGTTGGTAGTAGCTGTAGT
RBM10 Total	RBM10_ex24_qF	qRT-PCR	Supplemental Figs	ACCTCAACCGAGTCCTACAA
	RBM10_ex24_qR	qRT-PCR	Supplemental Figs	ACACCCAACATGTGGAGAAG
PORCN Intron 7	PORCN_int7_qF	qRT-PCR	Supplemental Figs	GGTATCATGTTGGGACCTGAA
	PORCN_ex8_qR	qRT-PCR	Supplemental Figs	AACGACTTCACCTTCCTCTG
PORCN Intron 12	PORCN_int12_qF	qRT-PCR	Supplemental Figs	AGGTGGGACACAGTGAGTA
	PORCN_ex13_qR	qRT-PCR	Supplemental Figs	CCAGAGCTCCAAAGAGCAA
PORCN Total	PORCN_ex14_qF	qRT-PCR	Supplemental Figs	TGGCATACACTGTCCACAAG
	PORCN_ex14_qR	qRT-PCR	Supplemental Figs	GGTAGAAGATCCAGCATCCAAA
CFP Intron 5	CFP_int5_qF	qRT-PCR	Supplemental Figs	TAGCATGCATGACCACACC
	CFP_ex6_qR	qRT-PCR	Supplemental Figs	GCTTCGTGTCTCCTTAGGTTC
CFP Intron 7	CFP_int7_qF	qRT-PCR	Supplemental Figs	CTTGCTGATTCCCTGCTTTG
	CFP_ex8_qR	qRT-PCR	Supplemental Figs	TTCTTGACAGCTGATGGACTT
CFP Total	CFP_ex10_qF	qRT-PCR	Supplemental Figs	TTTCCATGGTCGAAGGTCAG
	CFP_ex10_qR	qRT-PCR	Supplemental Figs	GTAGACATGGTCGTTTCTCCTC
G6PD Intron 5	G6PD_int5_qF	qRT-PCR	Supplemental Figs	GATGCAGCTCTGATCCTCAC
	G6PD_ex6_qR	qRT-PCR	Supplemental Figs	GGGCTTCTCCACGATGATG
G6PD Intron 7	G6PD_int7_qF	qRT-PCR	Supplemental Figs	GAGGCCCAAGGTCAGTTC
	G6PD_ex8_qR	qRT-PCR	Supplemental Figs	TAACGCAGGCGATGTTGT
G6PD Total	G6PD_ex14_qF	qRT-PCR	Supplemental Figs	AGGACTCCGGGACCATT
	G6PD_ex14_qR	qRT-PCR	Supplemental Figs	TTGGCAGCTGAGGAATGTAG
FMR1 Intron 5	FMR1_int5_qF	qRT-PCR	Supplemental Figs	TGCCTGCATTTATTTATGTCAGTAG
	FMR1_ex6_qR	qRT-PCR	Supplemental Figs	CCTTATGTGCCGCCTCTTT
FMR1 Intron 9	FMR1_int9_qF	qRT-PCR	Supplemental Figs	TGCTTACTGCTTTGAGGTATGT
	FMR1_ex10_qR	qRT-PCR	Supplemental Figs	GACTTGTCCACAATCTCCTGAA
FMR1 Total	FMR1_ex17_qF	qRT-PCR	Supplemental Figs	CTCGTGAATGGAGTACCCTAAAC
	FMR1_ex17_qR	qRT-PCR	Supplemental Figs	TGTGCCATCTTGCCTACTATTT
DDX3X Intron 7	DDX3X_int7_qF	qRT-PCR	Supplemental Figs	AACACTGTCATCTACCAATGTCT
	DDX3X_ex8_qR	qRT-PCR	Supplemental Figs	CTCAAGATGGGCAACAGAAATG
DDX3X Intron 15	DDX3X_int15_qF	qRT-PCR	Supplemental Figs	GGAAAGAGTTAGGTTACTTTAGTGGA
	DDX3X_ex16_qR	qRT-PCR	Supplemental Figs	GTAGTCTCTGGCACCAAACC
DDX3X Total	DDX3X_ex17_qF	qRT-PCR	Supplemental Figs	GCCAGACTATACCTTGTGTAGC
	DDX3X_ex17_qR	qRT-PCR	Supplemental Figs	GTGACCTTGAGCTCCCTTAAA
